# Supplementary material for: Fabrication and identification of polysulfone/Fe3O4@APTES nanocomposite membranes used in membrane bioreactors for oily wastewater treatment
Source: Royal Society of Chemistry journal article supplement (doi:10.1039/d4ew00821a), 2024-12-05
Supplement: d4ew00821a1.xlsx [file d4ew00821a1.xlsx]

## Sheet: FT-IR nano
		c	b	a
	4000	54.8003	93.767	85.767
	3999	54.7945	93.7635	85.7635
	3998	54.7887	93.7586	85.7586
	3997	54.7827	93.7523	85.7523
	3996	54.7766	93.7453	85.7453
	3995	54.7702	93.7384	85.7384
	3994	54.7634	93.732	85.732
	3993	54.7562	93.7265	85.7265
	3992	54.7488	93.7227	85.7227
	3991	54.7416	93.7213	85.7213
	3990	54.7351	93.7219	85.7219
	3989	54.7294	93.7226	85.7226
	3988	54.724	93.7219	85.7219
	3987	54.7189	93.7196	85.7196
	3986	54.7137	93.7165	85.7165
	3985	54.7082	93.7132	85.7132
	3984	54.7021	93.7099	85.7099
	3983	54.6955	93.7066	85.7066
	3982	54.6885	93.7033	85.7033
	3981	54.6818	93.6999	85.6999
	3980	54.6755	93.6964	85.6964
	3979	54.6696	93.6924	85.6924
	3978	54.6636	93.6873	85.6873
	3977	54.6575	93.6814	85.6814
	3976	54.6511	93.6749	85.6749
	3975	54.6447	93.6687	85.6687
	3974	54.6382	93.6633	85.6633
	3973	54.6317	93.6588	85.6588
	3972	54.6254	93.6547	85.6547
	3971	54.619	93.6508	85.6508
	3970	54.6125	93.6475	85.6475
	3969	54.6059	93.6449	85.6449
	3968	54.5993	93.6426	85.6426
	3967	54.5928	93.6397	85.6397
	3966	54.5865	93.6358	85.6358
	3965	54.58	93.631	85.631
	3964	54.5731	93.6257	85.6257
	3963	54.5657	93.6207	85.6207
	3962	54.5585	93.6164	85.6164
	3961	54.552	93.6125	85.6125
	3960	54.5461	93.6087	85.6087
	3959	54.5406	93.6047	85.6047
	3958	54.535	93.6006	85.6006
	3957	54.5294	93.5966	85.5966
	3956	54.5234	93.5926	85.5926
	3955	54.5174	93.5888	85.5888
	3954	54.5114	93.5851	85.5851
	3953	54.5055	93.5815	85.5815
	3952	54.4993	93.5779	85.5779
	3951	54.4927	93.574	85.574
	3950	54.4856	93.5696	85.5696
	3949	54.4785	93.5648	85.5648
	3948	54.4721	93.5604	85.5604
	3947	54.4664	93.5569	85.5569
	3946	54.46	93.5536	85.5536
	3945	54.4524	93.5497	85.5497
	3944	54.4444	93.545	85.545
	3943	54.4378	93.5404	85.5404
	3942	54.4324	93.5366	85.5366
	3941	54.4269	93.5334	85.5334
	3940	54.4207	93.5303	85.5303
	3939	54.4147	93.5281	85.5281
	3938	54.4102	93.5273	85.5273
	3937	54.4064	93.5266	85.5266
	3936	54.401	93.5232	85.5232
	3935	54.3928	93.5165	85.5165
	3934	54.3832	93.5087	85.5087
	3933	54.374	93.5025	85.5025
	3932	54.366	93.4982	85.4982
	3931	54.3593	93.495	85.495
	3930	54.3541	93.4931	85.4931
	3929	54.3503	93.4922	85.4922
	3928	54.3463	93.4904	85.4904
	3927	54.3414	93.4864	85.4864
	3926	54.3361	93.4815	85.4815
	3925	54.3313	93.4779	85.4779
	3924	54.3264	93.475	85.475
	3923	54.3209	93.4715	85.4715
	3922	54.3152	93.4677	85.4677
	3921	54.3096	93.4648	85.4648
	3920	54.3042	93.4625	85.4625
	3919	54.2986	93.4596	85.4596
	3918	54.2931	93.4562	85.4562
	3917	54.2875	93.4534	85.4534
	3916	54.282	93.4514	85.4514
	3915	54.2765	93.4493	85.4493
	3914	54.2709	93.4466	85.4466
	3913	54.2654	93.4435	85.4435
	3912	54.2597	93.4402	85.4402
	3911	54.2541	93.4368	85.4368
	3910	54.2484	93.4333	85.4333
	3909	54.2427	93.4297	85.4297
	3908	54.2369	93.4262	85.4262
	3907	54.2311	93.4229	85.4229
	3906	54.2253	93.4196	85.4196
	3905	54.2196	93.4164	85.4164
	3904	54.2139	93.4133	85.4133
	3903	54.2083	93.4103	85.4103
	3902	54.2027	93.4074	85.4074
	3901	54.1972	93.4046	85.4046
	3900	54.1919	93.4021	85.4021
	3899	54.1867	93.3997	85.3997
	3898	54.1815	93.3975	85.3975
	3897	54.1763	93.3953	85.3953
	3896	54.1713	93.3932	85.3932
	3895	54.1662	93.3912	85.3912
	3894	54.1613	93.3894	85.3894
	3893	54.1565	93.3876	85.3876
	3892	54.1517	93.386	85.386
	3891	54.1471	93.3845	85.3845
	3890	54.1424	93.383	85.383
	3889	54.1378	93.3815	85.3815
	3888	54.1331	93.38	85.38
	3887	54.1284	93.3786	85.3786
	3886	54.1237	93.3774	85.3774
	3885	54.119	93.3762	85.3762
	3884	54.1143	93.375	85.375
	3883	54.1095	93.3738	85.3738
	3882	54.1047	93.3727	85.3727
	3881	54.1	93.3717	85.3717
	3880	54.0954	93.3708	85.3708
	3879	54.0909	93.3701	85.3701
	3878	54.0865	93.3694	85.3694
	3877	54.0821	93.3687	85.3687
	3876	54.0776	93.3681	85.3681
	3875	54.0733	93.3674	85.3674
	3874	54.069	93.3667	85.3667
	3873	54.0648	93.3661	85.3661
	3872	54.0606	93.3654	85.3654
	3871	54.0565	93.3649	85.3649
	3870	54.0526	93.3646	85.3646
	3869	54.0489	93.3644	85.3644
	3868	54.0452	93.3643	85.3643
	3867	54.0416	93.3641	85.3641
	3866	54.0381	93.3641	85.3641
	3865	54.0347	93.3642	85.3642
	3864	54.0313	93.3643	85.3643
	3863	54.028	93.3645	85.3645
	3862	54.0247	93.3647	85.3647
	3861	54.0214	93.365	85.365
	3860	54.0181	93.3652	85.3652
	3859	54.0149	93.3655	85.3655
	3858	54.0115	93.3657	85.3657
	3857	54.0082	93.3659	85.3659
	3856	54.005	93.3662	85.3662
	3855	54.0019	93.3665	85.3665
	3854	53.9989	93.367	85.367
	3853	53.996	93.3673	85.3673
	3852	53.9929	93.3675	85.3675
	3851	53.9898	93.3676	85.3676
	3850	53.9867	93.3677	85.3677
	3849	53.9836	93.3678	85.3678
	3848	53.9807	93.3681	85.3681
	3847	53.9778	93.3685	85.3685
	3846	53.975	93.3689	85.3689
	3845	53.9722	93.3694	85.3694
	3844	53.9695	93.3698	85.3698
	3843	53.9668	93.3702	85.3702
	3842	53.9642	93.3707	85.3707
	3841	53.9617	93.3713	85.3713
	3840	53.9593	93.3719	85.3719
	3839	53.957	93.3725	85.3725
	3838	53.9547	93.3731	85.3731
	3837	53.9525	93.3737	85.3737
	3836	53.9503	93.3744	85.3744
	3835	53.9481	93.375	85.375
	3834	53.9461	93.3757	85.3757
	3833	53.944	93.3766	85.3766
	3832	53.9421	93.3776	85.3776
	3831	53.9403	93.3787	85.3787
	3830	53.9386	93.3799	85.3799
	3829	53.9368	93.3811	85.3811
	3828	53.9351	93.3824	85.3824
	3827	53.9333	93.3836	85.3836
	3826	53.9316	93.3849	85.3849
	3825	53.9299	93.3862	85.3862
	3824	53.9283	93.3875	85.3875
	3823	53.9267	93.3889	85.3889
	3822	53.9251	93.3903	85.3903
	3821	53.9237	93.3919	85.3919
	3820	53.9224	93.3935	85.3935
	3819	53.9211	93.3951	85.3951
	3818	53.9199	93.3967	85.3967
	3817	53.9188	93.3984	85.3984
	3816	53.9178	93.4003	85.4003
	3815	53.9169	93.4022	85.4022
	3814	53.916	93.404	85.404
	3813	53.9149	93.4057	85.4057
	3812	53.9137	93.4073	85.4073
	3811	53.9126	93.409	85.409
	3810	53.9114	93.4108	85.4108
	3809	53.9102	93.4125	85.4125
	3808	53.9091	93.4143	85.4143
	3807	53.9079	93.416	85.416
	3806	53.9066	93.4176	85.4176
	3805	53.9053	93.4191	85.4191
	3804	53.9039	93.4204	85.4204
	3803	53.9025	93.4217	85.4217
	3802	53.9012	93.423	85.423
	3801	53.9	93.4244	85.4244
	3800	53.8987	93.4257	85.4257
	3799	53.8974	93.4268	85.4268
	3798	53.896	93.428	85.428
	3797	53.8947	93.4291	85.4291
	3796	53.8934	93.4303	85.4303
	3795	53.8922	93.4315	85.4315
	3794	53.891	93.4327	85.4327
	3793	53.8898	93.434	85.434
	3792	53.8886	93.4352	85.4352
	3791	53.8873	93.4365	85.4365
	3790	53.886	93.4377	85.4377
	3789	53.8847	93.4387	85.4387
	3788	53.8832	93.4395	85.4395
	3787	53.8816	93.4401	85.4401
	3786	53.8799	93.4407	85.4407
	3785	53.8783	93.4413	85.4413
	3784	53.8767	93.4419	85.4419
	3783	53.8751	93.4424	85.4424
	3782	53.8734	93.4429	85.4429
	3781	53.8718	93.4433	85.4433
	3780	53.8701	93.4437	85.4437
	3779	53.8683	93.444	85.444
	3778	53.8665	93.4442	85.4442
	3777	53.8645	93.4442	85.4442
	3776	53.8625	93.4441	85.4441
	3775	53.8604	93.4438	85.4438
	3774	53.8581	93.4433	85.4433
	3773	53.8557	93.4426	85.4426
	3772	53.8533	93.4419	85.4419
	3771	53.8509	93.4412	85.4412
	3770	53.8486	93.4406	85.4406
	3769	53.8464	93.4399	85.4399
	3768	53.8442	93.4391	85.4391
	3767	53.8421	93.4384	85.4384
	3766	53.84	93.4378	85.4378
	3765	53.838	93.4372	85.4372
	3764	53.836	93.4365	85.4365
	3763	53.834	93.4359	85.4359
	3762	53.832	93.4353	85.4353
	3761	53.8301	93.4347	85.4347
	3760	53.8281	93.4341	85.4341
	3759	53.8262	93.4335	85.4335
	3758	53.8242	93.433	85.433
	3757	53.8224	93.4325	85.4325
	3756	53.8207	93.4321	85.4321
	3755	53.8189	93.4318	85.4318
	3754	53.8173	93.4316	85.4316
	3753	53.8156	93.4313	85.4313
	3752	53.8138	93.4309	85.4309
	3751	53.8121	93.4303	85.4303
	3750	53.8103	93.4296	85.4296
	3749	53.8085	93.4287	85.4287
	3748	53.8068	93.4279	85.4279
	3747	53.8052	93.4271	85.4271
	3746	53.8036	93.4265	85.4265
	3745	53.8023	93.4262	85.4262
	3744	53.8011	93.426	85.426
	3743	53.7999	93.4259	85.4259
	3742	53.7987	93.4257	85.4257
	3741	53.7974	93.4255	85.4255
	3740	53.7962	93.4254	85.4254
	3739	53.795	93.4254	85.4254
	3738	53.7939	93.4256	85.4256
	3737	53.7929	93.4259	85.4259
	3736	53.7921	93.4263	85.4263
	3735	53.7913	93.427	85.427
	3734	53.7906	93.4278	85.4278
	3733	53.7902	93.4289	85.4289
	3732	53.79	93.4304	85.4304
	3731	53.7899	93.432	85.432
	3730	53.7898	93.4337	85.4337
	3729	53.7898	93.4354	85.4354
	3728	53.7897	93.4371	85.4371
	3727	53.7897	93.4389	85.4389
	3726	53.7896	93.4407	85.4407
	3725	53.7895	93.4425	85.4425
	3724	53.7894	93.4444	85.4444
	3723	53.7894	93.4463	85.4463
	3722	53.7894	93.4483	85.4483
	3721	53.7895	93.4504	85.4504
	3720	53.7897	93.4525	85.4525
	3719	53.7899	93.4547	85.4547
	3718	53.7901	93.4569	85.4569
	3717	53.7902	93.459	85.459
	3716	53.7903	93.461	85.461
	3715	53.7902	93.463	85.463
	3714	53.79	93.4648	85.4648
	3713	53.7897	93.4665	85.4665
	3712	53.7893	93.468	85.468
	3711	53.7888	93.4695	85.4695
	3710	53.7882	93.4709	85.4709
	3709	53.7876	93.4725	85.4725
	3708	53.7871	93.4742	85.4742
	3707	53.7865	93.4761	85.4761
	3706	53.786	93.478	85.478
	3705	53.7854	93.4801	85.4801
	3704	53.7849	93.4822	85.4822
	3703	53.7843	93.4842	85.4842
	3702	53.7835	93.486	85.486
	3701	53.7828	93.4879	85.4879
	3700	53.782	93.4898	85.4898
	3699	53.7812	93.4914	85.4914
	3698	53.7804	93.4929	85.4929
	3697	53.78	93.4949	85.4949
	3696	53.7798	93.4971	85.4971
	3695	53.7794	93.4984	85.4984
	3694	53.7786	93.4985	85.4985
	3693	53.7774	93.4983	85.4983
	3692	53.7761	93.4984	85.4984
	3691	53.7743	93.4981	85.4981
	3690	53.7719	93.4971	85.4971
	3689	53.7698	93.4965	85.4965
	3688	53.7686	93.4975	85.4975
	3687	53.7679	93.4988	85.4988
	3686	53.7663	93.4977	85.4977
	3685	53.7642	93.4951	85.4951
	3684	53.7627	93.4946	85.4946
	3683	53.7621	93.496	85.496
	3682	53.7612	93.4958	85.4958
	3681	53.7595	93.493	85.493
	3680	53.7577	93.4899	85.4899
	3679	53.7557	93.4864	85.4864
	3678	53.7518	93.4793	85.4793
	3677	53.7463	93.4711	85.4711
	3676	53.742	93.4675	85.4675
	3675	53.7399	93.4681	85.4681
	3674	53.7385	93.4697	85.4697
	3673	53.7353	93.466	85.466
	3672	53.7312	93.4589	85.4589
	3671	53.7303	93.4587	85.4587
	3670	53.7323	93.4643	85.4643
	3669	53.7327	93.466	85.466
	3668	53.7308	93.4645	85.4645
	3667	53.7291	93.4649	85.4649
	3666	53.7295	93.469	85.469
	3665	53.7316	93.4754	85.4754
	3664	53.7335	93.4803	85.4803
	3663	53.7338	93.4821	85.4821
	3662	53.7327	93.4821	85.4821
	3661	53.7316	93.4825	85.4825
	3660	53.7301	93.4813	85.4813
	3659	53.7274	93.4766	85.4766
	3658	53.7238	93.4701	85.4701
	3657	53.7213	93.4675	85.4675
	3656	53.7207	93.4694	85.4694
	3655	53.7198	93.4693	85.4693
	3654	53.716	93.4604	85.4604
	3653	53.7101	93.445	85.445
	3652	53.706	93.4342	85.4342
	3651	53.7051	93.4327	85.4327
	3650	53.7027	93.4266	85.4266
	3649	53.694	93.4039	85.4039
	3648	53.683	93.38	85.38
	3647	53.6767	93.3732	85.3732
	3646	53.6763	93.3831	85.3831
	3645	53.679	93.3988	85.3988
	3644	53.6824	93.4126	85.4126
	3643	53.6857	93.4238	85.4238
	3642	53.6885	93.4338	85.4338
	3641	53.6898	93.4417	85.4417
	3640	53.6889	93.4458	85.4458
	3639	53.6866	93.4475	85.4475
	3638	53.6841	93.4484	85.4484
	3637	53.6811	93.4465	85.4465
	3636	53.6766	93.44	85.44
	3635	53.672	93.4333	85.4333
	3634	53.6691	93.4315	85.4315
	3633	53.6669	93.4314	85.4314
	3632	53.6625	93.4253	85.4253
	3631	53.6559	93.4159	85.4159
	3630	53.6506	93.4145	85.4145
	3629	53.6474	93.4188	85.4188
	3628	53.6439	93.4192	85.4192
	3627	53.6395	93.4151	85.4151
	3626	53.6347	93.4102	85.4102
	3625	53.6317	93.4102	85.4102
	3624	53.6308	93.4158	85.4158
	3623	53.6298	93.4186	85.4186
	3622	53.6262	93.4115	85.4115
	3621	53.6204	93.3975	85.3975
	3620	53.6146	93.3834	85.3834
	3619	53.6098	93.3721	85.3721
	3618	53.6061	93.3652	85.3652
	3617	53.6028	93.3616	85.3616
	3616	53.5986	93.3573	85.3573
	3615	53.5938	93.3522	85.3522
	3614	53.5896	93.3495	85.3495
	3613	53.5867	93.3497	85.3497
	3612	53.5846	93.3514	85.3514
	3611	53.5828	93.3547	85.3547
	3610	53.5816	93.3611	85.3611
	3609	53.5805	93.3694	85.3694
	3608	53.5782	93.3745	85.3745
	3607	53.5737	93.3751	85.3751
	3606	53.5687	93.3757	85.3757
	3605	53.5653	93.3804	85.3804
	3604	53.5634	93.3877	85.3877
	3603	53.5609	93.3935	85.3935
	3602	53.5563	93.3945	85.3945
	3601	53.5499	93.3912	85.3912
	3600	53.5433	93.3849	85.3849
	3599	53.5376	93.3771	85.3771
	3598	53.5332	93.3689	85.3689
	3597	53.5297	93.3613	85.3613
	3596	53.5261	93.3541	85.3541
	3595	53.5216	93.3487	85.3487
	3594	53.5169	93.3474	85.3474
	3593	53.5127	93.3504	85.3504
	3592	53.5088	93.3551	85.3551
	3591	53.5038	93.3576	85.3576
	3590	53.497	93.3563	85.3563
	3589	53.4882	93.3509	85.3509
	3588	53.477	93.339	85.339
	3587	53.4652	93.3236	85.3236
	3586	53.4575	93.3147	85.3147
	3585	53.4554	93.3162	85.3162
	3584	53.4565	93.3241	85.3241
	3583	53.4586	93.3337	85.3337
	3582	53.4599	93.3418	85.3418
	3581	53.459	93.3471	85.3471
	3580	53.4554	93.3495	85.3495
	3579	53.4495	93.35	85.35
	3578	53.4426	93.349	85.349
	3577	53.4357	93.3466	85.3466
	3576	53.4295	93.343	85.343
	3575	53.4245	93.3392	85.3392
	3574	53.4208	93.337	85.337
	3573	53.4176	93.3368	85.3368
	3572	53.4137	93.3373	85.3373
	3571	53.4077	93.3357	85.3357
	3570	53.3985	93.3292	85.3292
	3569	53.3863	93.3162	85.3162
	3568	53.3701	93.2945	85.2945
	3567	53.3502	93.2662	85.2662
	3566	53.3326	93.2441	85.2441
	3565	53.3239	93.2392	85.2392
	3564	53.324	93.2493	85.2493
	3563	53.3289	93.2659	85.2659
	3562	53.3338	93.2812	85.2812
	3561	53.3353	93.2916	85.2916
	3560	53.3327	93.2971	85.2971
	3559	53.3278	93.3002	85.3002
	3558	53.3226	93.3026	85.3026
	3557	53.3182	93.3047	85.3047
	3556	53.3141	93.3057	85.3057
	3555	53.3086	93.3043	85.3043
	3554	53.3008	93.2998	85.2998
	3553	53.2916	93.2938	85.2938
	3552	53.2832	93.2892	85.2892
	3551	53.2771	93.2871	85.2871
	3550	53.2724	93.286	85.286
	3549	53.2678	93.2832	85.2832
	3548	53.2618	93.2779	85.2779
	3547	53.2533	93.27	85.27
	3546	53.2417	93.261	85.261
	3545	53.2294	93.2541	85.2541
	3544	53.2201	93.2521	85.2521
	3543	53.2154	93.2549	85.2549
	3542	53.2146	93.2608	85.2608
	3541	53.2146	93.2667	85.2667
	3540	53.2129	93.27	85.27
	3539	53.2083	93.2691	85.2691
	3538	53.2014	93.2648	85.2648
	3537	53.1934	93.2594	85.2594
	3536	53.1849	93.2547	85.2547
	3535	53.176	93.2518	85.2518
	3534	53.1669	93.2502	85.2502
	3533	53.1584	93.2489	85.2489
	3532	53.1503	93.2471	85.2471
	3531	53.142	93.2445	85.2445
	3530	53.1326	93.2409	85.2409
	3529	53.1221	93.2369	85.2369
	3528	53.1111	93.2329	85.2329
	3527	53.0997	93.2287	85.2287
	3526	53.0881	93.2237	85.2237
	3525	53.0765	93.2183	85.2183
	3524	53.0657	93.2138	85.2138
	3523	53.0565	93.2116	85.2116
	3522	53.0495	93.2117	85.2117
	3521	53.0441	93.2127	85.2127
	3520	53.0391	93.2129	85.2129
	3519	53.034	93.2122	85.2122
	3518	53.0288	93.2109	85.2109
	3517	53.0228	93.2094	85.2094
	3516	53.0155	93.2072	85.2072
	3515	53.0071	93.2044	85.2044
	3514	52.9982	93.2011	85.2011
	3513	52.9886	93.1973	85.1973
	3512	52.9776	93.1929	85.1929
	3511	52.9655	93.1884	85.1884
	3510	52.9536	93.1844	85.1844
	3509	52.9439	93.1813	85.1813
	3508	52.9368	93.1793	85.1793
	3507	52.931	93.1778	85.1778
	3506	52.9243	93.176	85.176
	3505	52.9156	93.1732	85.1732
	3504	52.9046	93.1696	85.1696
	3503	52.8924	93.1654	85.1654
	3502	52.8811	93.1617	85.1617
	3501	52.872	93.159	85.159
	3500	52.8647	93.157	85.157
	3499	52.8576	93.1553	85.1553
	3498	52.8496	93.1531	85.1531
	3497	52.8406	93.1506	85.1506
	3496	52.831	93.1477	85.1477
	3495	52.8215	93.1449	85.1449
	3494	52.8129	93.1424	85.1424
	3493	52.8052	93.1402	85.1402
	3492	52.7978	93.1381	85.1381
	3491	52.7896	93.1356	85.1356
	3490	52.7802	93.1326	85.1326
	3489	52.7697	93.1292	85.1292
	3488	52.7585	93.1258	85.1258
	3487	52.7473	93.1227	85.1227
	3486	52.7367	93.1198	85.1198
	3485	52.7266	93.117	85.117
	3484	52.717	93.114	85.114
	3483	52.7075	93.1109	85.1109
	3482	52.6978	93.1077	85.1077
	3481	52.688	93.1046	85.1046
	3480	52.6781	93.1017	85.1017
	3479	52.6683	93.0994	85.0994
	3478	52.659	93.0977	85.0977
	3477	52.6501	93.0964	85.0964
	3476	52.6414	93.0947	85.0947
	3475	52.6327	93.0919	85.0919
	3474	52.6239	93.0877	85.0877
	3473	52.6151	93.0826	85.0826
	3472	52.6061	93.0772	85.0772
	3471	52.5967	93.0724	85.0724
	3470	52.5864	93.0687	85.0687
	3469	52.5749	93.0658	85.0658
	3468	52.5628	93.0637	85.0637
	3467	52.5514	93.0617	85.0617
	3466	52.5414	93.0597	85.0597
	3465	52.5324	93.057	85.057
	3464	52.5229	93.0536	85.0536
	3463	52.5122	93.0498	85.0498
	3462	52.5008	93.0462	85.0462
	3461	52.4903	93.0431	85.0431
	3460	52.4817	93.041	85.041
	3459	52.4748	93.04	85.04
	3458	52.4682	93.0396	85.0396
	3457	52.4605	93.0382	85.0382
	3456	52.451	93.0346	85.0346
	3455	52.4403	93.0294	85.0294
	3454	52.4291	93.0241	85.0241
	3453	52.4182	93.0202	85.0202
	3452	52.4078	93.0175	85.0175
	3451	52.3975	93.0144	85.0144
	3450	52.3869	93.0089	85.0089
	3449	52.3757	93.0005	85.0005
	3448	52.3643	92.9906	84.9906
	3447	52.3527	92.9822	84.9822
	3446	52.3409	92.9771	84.9771
	3445	52.3294	92.9747	84.9747
	3444	52.3189	92.9736	84.9736
	3443	52.3099	92.9723	84.9723
	3442	52.3019	92.9704	84.9704
	3441	52.2941	92.968	84.968
	3440	52.2864	92.965	84.965
	3439	52.2797	92.9617	84.9617
	3438	52.274	92.9587	84.9587
	3437	52.2681	92.9557	84.9557
	3436	52.2606	92.9528	84.9528
	3435	52.2512	92.9498	84.9498
	3434	52.2407	92.9463	84.9463
	3433	52.2306	92.9421	84.9421
	3432	52.2216	92.937	84.937
	3431	52.2129	92.9312	84.9312
	3430	51.6054	93.4645	85.4645
	3429	51.6115	93.4678	85.4678
	3428	51.6157	93.4683	85.4683
	3427	51.6197	93.4681	85.4681
	3426	51.6252	93.4701	85.4701
	3425	51.6323	93.4747	85.4747
	3424	51.6391	93.4791	85.4791
	3423	51.6447	93.4809	85.4809
	3422	51.6519	93.4834	85.4834
	3421	51.6601	93.4876	85.4876
	3420	51.6669	93.4918	85.4918
	3419	51.6727	93.4963	85.4963
	3418	51.6788	93.5009	85.5009
	3417	51.6844	93.5033	85.5033
	3416	51.6893	93.5018	85.5018
	3415	51.6953	93.5	85.5
	3414	51.7015	93.499	85.499
	3413	51.7066	93.4983	85.4983
	3412	51.7107	93.4975	85.4975
	3411	51.7147	93.4962	85.4962
	3410	51.7201	93.4974	85.4974
	3409	51.7263	93.5002	85.5002
	3408	51.7326	93.503	85.503
	3407	51.7384	93.5036	85.5036
	3406	51.7437	93.5022	85.5022
	3405	51.7493	93.5051	85.5051
	3404	51.7554	93.5142	85.5142
	3403	51.7608	93.5191	85.5191
	3402	51.7661	93.5194	85.5194
	3401	51.7716	93.5195	85.5195
	3400	51.7772	93.519	85.519
	3399	51.783	93.5195	85.5195
	3398	51.7891	93.5213	85.5213
	3397	51.7954	93.5229	85.5229
	3396	51.8014	93.5232	85.5232
	3395	51.8069	93.5255	85.5255
	3394	51.8124	93.5324	85.5324
	3393	51.8183	93.5399	85.5399
	3392	51.8243	93.5398	85.5398
	3391	51.8297	93.5318	85.5318
	3390	51.8343	93.5211	85.5211
	3389	51.8386	93.5137	85.5137
	3388	51.8448	93.5132	85.5132
	3387	51.8522	93.5151	85.5151
	3386	51.8591	93.5152	85.5152
	3385	51.8641	93.5136	85.5136
	3384	51.8683	93.5133	85.5133
	3383	51.8729	93.5136	85.5136
	3382	51.8763	93.51	85.51
	3381	51.8763	93.5003	85.5003
	3380	51.8726	93.4878	85.4878
	3379	51.8696	93.4781	85.4781
	3378	51.871	93.4737	85.4737
	3377	51.8787	93.475	85.475
	3376	51.8872	93.4778	85.4778
	3375	51.8899	93.4785	85.4785
	3374	51.89	93.4786	85.4786
	3373	51.8952	93.4811	85.4811
	3372	51.9061	93.4853	85.4853
	3371	51.9186	93.4897	85.4897
	3370	51.9295	93.4931	85.4931
	3369	51.9344	93.495	85.495
	3368	51.9279	93.495	85.495
	3367	51.9212	93.498	85.498
	3366	51.9389	93.5102	85.5102
	3365	51.966	93.5211	85.5211
	3364	51.981	93.5226	85.5226
	3363	51.9825	93.5181	85.5181
	3362	51.9699	93.5106	85.5106
	3361	51.9588	93.5067	85.5067
	3360	51.9654	93.5117	85.5117
	3359	51.9854	93.5222	85.5222
	3358	52.0042	93.5314	85.5314
	3357	52.0191	93.5376	85.5376
	3356	52.0275	93.539	85.539
	3355	52.0272	93.5357	85.5357
	3354	52.0255	93.5317	85.5317
	3353	52.0211	93.5279	85.5279
	3352	52.0077	93.5234	85.5234
	3351	51.9904	93.5238	85.5238
	3350	51.9878	93.5392	85.5392
	3349	51.9896	93.5551	85.5551
	3348	51.9712	93.5489	85.5489
	3347	51.9551	93.5372	85.5372
	3346	51.9517	93.5358	85.5358
	3345	51.9454	93.5385	85.5385
	3344	51.9321	93.5397	85.5397
	3343	51.9228	93.5406	85.5406
	3342	51.9217	93.5407	85.5407
	3341	51.9228	93.537	85.537
	3340	51.9222	93.5305	85.5305
	3339	51.9168	93.5236	85.5236
	3338	51.9056	93.5199	85.5199
	3337	51.8897	93.5179	85.5179
	3336	51.8751	93.5137	85.5137
	3335	51.8724	93.5109	85.5109
	3334	51.8696	93.5065	85.5065
	3333	51.8711	93.5132	85.5132
	3332	51.9015	93.549	85.549
	3331	51.9277	93.5738	85.5738
	3330	51.9335	93.5699	85.5699
	3329	51.8957	93.5371	85.5371
	3328	51.8213	93.4998	85.4998
	3327	51.773	93.5027	85.5027
	3326	51.7747	93.5363	85.5363
	3325	51.7756	93.55	85.55
	3324	51.7324	93.5251	85.5251
	3323	51.6628	93.4883	85.4883
	3322	51.5971	93.4614	85.4614
	3321	51.5321	93.4358	85.4358
	3320	51.4593	93.4038	85.4038
	3319	51.3818	93.3691	85.3691
	3318	51.3091	93.3404	85.3404
	3317	51.2536	93.3315	85.3315
	3316	51.1992	93.3351	85.3351
	3315	51.1001	93.3027	85.3027
	3314	51.0056	93.2563	85.2563
	3313	50.9369	93.2184	85.2184
	3312	50.8614	93.1794	85.1794
	3311	50.7816	93.1455	85.1455
	3310	50.7094	93.1187	85.1187
	3309	50.6428	93.0943	85.0943
	3308	50.5759	93.073	85.073
	3307	50.5059	93.053	85.053
	3306	50.4274	93.0139	85.0139
	3305	50.3548	92.9603	84.9603
	3304	50.286	92.9011	84.9011
	3303	50.2064	92.8394	84.8394
	3302	50.1196	92.7841	84.7841
	3301	50.025	92.727	84.727
	3300	49.9311	92.6635	84.6635
	3299	49.8562	92.6066	84.6066
	3298	49.7963	92.5584	84.5584
	3297	49.7386	92.5161	84.5161
	3296	49.6743	92.4771	84.4771
	3295	49.604	92.4399	84.4399
	3294	49.5257	92.3893	84.3893
	3293	49.4456	92.3249	84.3249
	3292	49.3797	92.2697	84.2697
	3291	49.3198	92.22	84.22
	3290	49.2585	92.1671	84.1671
	3289	49.2002	92.1152	84.1152
	3288	49.1422	92.067	84.067
	3287	49.073	92.017	84.017
	3286	49.0079	91.9874	83.9874
	3285	48.9635	91.9814	83.9814
	3284	48.8877	91.8983	83.8983
	3283	48.8444	91.8293	83.8293
	3282	48.8318	91.7991	83.7991
	3281	48.7864	91.7393	83.7393
	3280	48.7131	91.6616	83.6616
	3279	48.6356	91.5846	83.5846
	3278	48.5588	91.494	83.494
	3277	48.5035	91.4203	83.4203
	3276	48.4778	91.3951	83.3951
	3275	48.4533	91.3854	83.3854
	3274	48.4156	91.3665	83.3665
	3273	48.3718	91.3465	83.3465
	3272	48.3332	91.3408	83.3408
	3271	48.2963	91.3442	83.3442
	3270	48.2553	91.3477	83.3477
	3269	48.2089	91.3481	83.3481
	3268	48.1607	91.3503	83.3503
	3267	48.1071	91.3398	83.3398
	3266	48.0633	91.3282	83.3282
	3265	48.0477	91.3434	83.3434
	3264	48.0297	91.358	83.358
	3263	47.9972	91.3646	83.3646
	3262	47.96	91.3754	83.3754
	3261	47.9234	91.3921	83.3921
	3260	47.8843	91.4082	83.4082
	3259	47.8432	91.4202	83.4202
	3258	47.805	91.4292	83.4292
	3257	47.7727	91.4398	83.4398
	3256	47.742	91.4524	83.4524
	3255	47.7047	91.4597	83.4597
	3254	47.6585	91.4532	83.4532
	3253	47.6192	91.4501	83.4501
	3252	47.5958	91.4668	83.4668
	3251	47.5725	91.4882	83.4882
	3250	47.5418	91.5081	83.5081
	3249	47.5111	91.535	83.535
	3248	47.4817	91.5647	83.5647
	3247	47.4501	91.5829	83.5829
	3246	47.4197	91.5896	83.5896
	3245	47.3885	91.5883	83.5883
	3244	47.3577	91.5898	83.5898
	3243	47.3315	91.6016	83.6016
	3242	47.3022	91.6095	83.6095
	3241	47.2635	91.6055	83.6055
	3240	47.2233	91.6031	83.6031
	3239	47.1895	91.6094	83.6094
	3238	47.1593	91.6128	83.6128
	3237	47.1326	91.6113	83.6113
	3236	47.1124	91.6143	83.6143
	3235	47.09	91.6167	83.6167
	3234	47.0589	91.6121	83.6121
	3233	47.027	91.6057	83.6057
	3232	47.0027	91.6063	83.6063
	3231	46.984	91.61	83.61
	3230	46.9651	91.6087	83.6087
	3229	46.9482	91.6034	83.6034
	3228	46.9347	91.596	83.596
	3227	46.9192	91.5837	83.5837
	3226	46.8978	91.5656	83.5656
	3225	46.875	91.5497	83.5497
	3224	46.857	91.5445	83.5445
	3223	46.8418	91.5458	83.5458
	3222	46.8243	91.5429	83.5429
	3221	46.8059	91.5332	83.5332
	3220	46.7923	91.5224	83.5224
	3219	46.7832	91.5112	83.5112
	3218	46.7743	91.4955	83.4955
	3217	46.7636	91.4748	83.4748
	3216	46.7551	91.4573	83.4573
	3215	46.7475	91.4424	83.4424
	3214	46.7352	91.4227	83.4227
	3213	46.7233	91.4004	83.4004
	3212	46.7188	91.3818	83.3818
	3211	46.7155	91.3637	83.3637
	3210	46.7046	91.3421	83.3421
	3209	46.6919	91.3246	83.3246
	3208	46.6861	91.3157	83.3157
	3207	46.6827	91.3025	83.3025
	3206	46.6778	91.2815	83.2815
	3205	46.6722	91.2615	83.2615
	3204	46.6631	91.2444	83.2444
	3203	46.651	91.2296	83.2296
	3202	46.6396	91.2134	83.2134
	3201	46.6245	91.1842	83.1842
	3200	46.6108	91.1496	83.1496
	3199	46.6054	91.1249	83.1249
	3198	46.6013	91.1065	83.1065
	3197	46.5949	91.0884	83.0884
	3196	46.5909	91.0728	83.0728
	3195	46.5864	91.0571	83.0571
	3194	46.577	91.0417	83.0417
	3193	46.5655	91.0302	83.0302
	3192	46.5727	91.0379	83.0379
	3191	46.5973	91.0553	83.0553
	3190	46.5635	91.0067	83.0067
	3189	46.5188	90.9427	82.9427
	3188	46.5364	90.9381	82.9381
	3187	46.5516	90.9388	82.9388
	3186	46.5493	90.9293	82.9293
	3185	46.5559	90.9276	82.9276
	3184	46.5723	90.932	82.932
	3183	46.5769	90.9275	82.9275
	3182	46.5665	90.9124	82.9124
	3181	46.557	90.8971	82.8971
	3180	46.5616	90.8934	82.8934
	3179	46.5779	90.9024	82.9024
	3178	46.5917	90.914	82.914
	3177	46.6003	90.923	82.923
	3176	46.605	90.9275	82.9275
	3175	46.6043	90.9269	82.9269
	3174	46.6058	90.9303	82.9303
	3173	46.6171	90.9427	82.9427
	3172	46.6224	90.9496	82.9496
	3171	46.6084	90.9389	82.9389
	3170	46.6162	90.9426	82.9426
	3169	46.663	90.9733	82.9733
	3168	46.7021	90.9989	82.9989
	3167	46.7167	91.0134	83.0134
	3166	46.7208	91.0284	83.0284
	3165	46.7257	91.0437	83.0437
	3164	46.7354	91.0516	83.0516
	3163	46.761	91.0639	83.0639
	3162	46.8002	91.087	83.087
	3161	46.837	91.1102	83.1102
	3160	46.8651	91.1289	83.1289
	3159	46.8888	91.1461	83.1461
	3158	46.916	91.1637	83.1637
	3157	46.9549	91.1828	83.1828
	3156	47.002	91.2019	83.2019
	3155	47.0411	91.2184	83.2184
	3154	47.0696	91.2372	83.2372
	3153	47.1013	91.2621	83.2621
	3152	47.1513	91.291	83.291
	3151	47.2218	91.3242	83.3242
	3150	47.2845	91.3476	83.3476
	3149	47.3285	91.3569	83.3569
	3148	47.3692	91.3636	83.3636
	3147	47.4244	91.3845	83.3845
	3146	47.4965	91.4241	83.4241
	3145	47.5716	91.4674	83.4674
	3144	47.6417	91.502	83.502
	3143	47.7083	91.529	83.529
	3142	47.7713	91.5521	83.5521
	3141	47.8229	91.5696	83.5696
	3140	47.8615	91.5814	83.5814
	3139	47.8964	91.5913	83.5913
	3138	47.9489	91.6009	83.6009
	3137	48.0613	91.6405	83.6405
	3136	48.2135	91.7098	83.7098
	3135	48.3222	91.7509	83.7509
	3134	48.3843	91.7629	83.7629
	3133	48.4375	91.7725	83.7725
	3132	48.4993	91.7877	83.7877
	3131	48.5625	91.8023	83.8023
	3130	48.621	91.8135	83.8135
	3129	48.684	91.8223	83.8223
	3128	48.7522	91.8175	83.8175
	3127	48.8277	91.8062	83.8062
	3126	48.9095	91.8059	83.8059
	3125	48.9784	91.8105	83.8105
	3124	49.021	91.8104	83.8104
	3123	49.0476	91.8131	83.8131
	3122	49.0746	91.8256	83.8256
	3121	49.1053	91.8357	83.8357
	3120	49.142	91.8353	83.8353
	3119	49.1977	91.8423	83.8423
	3118	49.2743	91.8659	83.8659
	3117	49.3495	91.8906	83.8906
	3116	49.4121	91.9111	83.9111
	3115	49.4599	91.9275	83.9275
	3114	49.4945	91.94	83.94
	3113	49.5246	91.9512	83.9512
	3112	49.5538	91.9606	83.9606
	3111	49.5846	91.9711	83.9711
	3110	49.6163	91.9823	83.9823
	3109	49.6482	91.9913	83.9913
	3108	49.6735	91.9925	83.9925
	3107	49.6909	91.9905	83.9905
	3106	49.7041	91.9892	83.9892
	3105	49.7166	91.9845	83.9845
	3104	49.7259	91.9635	83.9635
	3103	49.7344	91.9291	83.9291
	3102	49.7562	91.9034	83.9034
	3101	49.7763	91.8776	83.8776
	3100	49.7742	91.8362	83.8362
	3099	49.7557	91.7887	83.7887
	3098	49.7349	91.749	83.749
	3097	49.716	91.7193	83.7193
	3096	49.6966	91.6957	83.6957
	3095	49.675	91.6762	83.6762
	3094	49.6578	91.6658	83.6658
	3093	49.6358	91.6552	83.6552
	3092	49.5937	91.6359	83.6359
	3091	49.5281	91.6118	83.6118
	3090	49.4513	91.598	83.598
	3089	49.3719	91.6003	83.6003
	3088	49.282	91.6029	83.6029
	3087	49.2085	91.6135	83.6135
	3086	49.1535	91.624	83.624
	3085	49.0826	91.6163	83.6163
	3084	48.9916	91.602	83.602
	3083	48.8955	91.5935	83.5935
	3082	48.8066	91.5903	83.5903
	3081	48.7225	91.5869	83.5869
	3080	48.6275	91.5785	83.5785
	3079	48.5246	91.5727	83.5727
	3078	48.4348	91.5766	83.5766
	3077	48.3714	91.5912	83.5912
	3076	48.3222	91.6056	83.6056
	3075	48.2646	91.6076	83.6076
	3074	48.2026	91.6059	83.6059
	3073	48.1469	91.6112	83.6112
	3072	48.0942	91.6205	83.6205
	3071	48.0358	91.6258	83.6258
	3070	47.9802	91.6346	83.6346
	3069	47.9417	91.657	83.657
	3068	47.9091	91.6775	83.6775
	3067	47.8727	91.6798	83.6798
	3066	47.8505	91.6805	83.6805
	3065	47.8394	91.6886	83.6886
	3064	47.821	91.6982	83.6982
	3063	47.7936	91.7066	83.7066
	3062	47.765	91.7137	83.7137
	3061	47.7418	91.7227	83.7227
	3060	47.7207	91.735	83.735
	3059	47.7028	91.7528	83.7528
	3058	47.6871	91.7722	83.7722
	3057	47.6696	91.7915	83.7915
	3056	47.6468	91.8096	83.8096
	3055	47.6129	91.8188	83.8188
	3054	47.5815	91.8265	83.8265
	3053	47.5641	91.8445	83.8445
	3052	47.5545	91.8737	83.8737
	3051	47.5384	91.9015	83.9015
	3050	47.512	91.913	83.913
	3049	47.4925	91.9131	83.9131
	3048	47.4794	91.91	83.91
	3047	47.4599	91.9042	83.9042
	3046	47.4422	91.9038	83.9038
	3045	47.4369	91.9148	83.9148
	3044	47.4346	91.9279	83.9279
	3043	47.4235	91.9307	83.9307
	3042	47.4128	91.9279	83.9279
	3041	47.4174	91.9334	83.9334
	3040	47.4301	91.9469	83.9469
	3039	47.4408	91.962	83.962
	3038	47.4499	91.9754	83.9754
	3037	47.4598	91.9897	83.9897
	3036	47.4686	92.0073	84.0073
	3035	47.4745	92.0255	84.0255
	3034	47.4854	92.044	84.044
	3033	47.5035	92.0611	84.0611
	3032	47.52	92.0729	84.0729
	3031	47.5284	92.0772	84.0772
	3030	50.4966	92.1732	84.1732
	3029	50.4908	92.1724	84.1724
	3028	50.4856	92.1725	84.1725
	3027	50.4813	92.1724	84.1724
	3026	50.4787	92.1719	84.1719
	3025	50.478	92.1717	84.1717
	3024	50.4783	92.173	84.173
	3023	50.4785	92.1758	84.1758
	3022	50.4778	92.1788	84.1788
	3021	50.4761	92.18	84.18
	3020	50.4734	92.1786	84.1786
	3019	50.4694	92.1756	84.1756
	3018	50.4642	92.1731	84.1731
	3017	50.4587	92.1726	84.1726
	3016	50.4539	92.1739	84.1739
	3015	50.45	92.175	84.175
	3014	50.4463	92.1737	84.1737
	3013	50.4427	92.1683	84.1683
	3012	50.4389	92.1602	84.1602
	3011	50.4352	92.1534	84.1534
	3010	50.4311	92.1522	84.1522
	3009	50.4269	92.1567	84.1567
	3008	50.4229	92.1628	84.1628
	3007	50.4195	92.1662	84.1662
	3006	50.4165	92.1662	84.1662
	3005	50.4134	92.165	84.165
	3004	50.41	92.1652	84.1652
	3003	50.4066	92.1673	84.1673
	3002	50.4033	92.1703	84.1703
	3001	50.4007	92.1723	84.1723
	3000	50.3994	92.1724	84.1724
	2999	50.4	92.1721	84.1721
	2998	50.4017	92.1746	84.1746
	2997	50.4027	92.1813	84.1813
	2996	50.401	92.1896	84.1896
	2995	50.3963	92.1951	84.1951
	2994	50.3891	92.1962	84.1962
	2993	50.3811	92.1951	84.1951
	2992	50.3741	92.1953	84.1953
	2991	50.3697	92.198	84.198
	2990	50.3676	92.2016	84.2016
	2989	50.366	92.2034	84.2034
	2988	50.3635	92.2018	84.2018
	2987	50.3595	92.1983	84.1983
	2986	50.3548	92.1964	84.1964
	2985	50.3495	92.1985	84.1985
	2984	50.3441	92.2037	84.2037
	2983	50.3393	92.2084	84.2084
	2982	50.3355	92.2101	84.2101
	2981	50.332	92.2084	84.2084
	2980	50.3277	92.2049	84.2049
	2979	50.3226	92.2021	84.2021
	2978	50.3177	92.2018	84.2018
	2977	50.3133	92.2034	84.2034
	2976	50.3085	92.2033	84.2033
	2975	50.3025	92.1976	84.1976
	2974	50.2958	92.1859	84.1859
	2973	50.2897	92.1714	84.1714
	2972	50.2846	92.157	84.157
	2971	50.2797	92.1429	84.1429
	2970	50.2738	92.1265	84.1265
	2969	50.2661	92.1061	84.1061
	2968	50.257	92.0819	84.0819
	2967	50.248	92.0561	84.0561
	2966	50.2406	92.0299	84.0299
	2965	50.2347	92.0021	84.0021
	2964	50.2293	91.9702	83.9702
	2963	50.2234	91.9339	83.9339
	2962	50.2165	91.897	83.897
	2961	50.2079	91.8642	83.8642
	2960	50.1974	91.8377	83.8377
	2959	50.1861	91.8158	83.8158
	2958	50.1759	91.796	83.796
	2957	50.1682	91.7766	83.7766
	2956	50.1621	91.7569	83.7569
	2955	50.157	91.7381	83.7381
	2954	50.1534	91.7222	83.7222
	2953	50.1512	91.7112	83.7112
	2952	50.1489	91.7045	83.7045
	2951	50.1441	91.7007	83.7007
	2950	50.1361	91.6995	83.6995
	2949	50.1261	91.7016	83.7016
	2948	50.1156	91.7058	83.7058
	2947	50.1052	91.7082	83.7082
	2946	50.0961	91.7063	83.7063
	2945	50.0888	91.7002	83.7002
	2944	50.0827	91.6916	83.6916
	2943	50.0757	91.6804	83.6804
	2942	50.0666	91.6642	83.6642
	2941	50.0558	91.6402	83.6402
	2940	50.0446	91.6067	83.6067
	2939	50.0331	91.5645	83.5645
	2938	50.0208	91.5179	83.5179
	2937	50.0073	91.4713	83.4713
	2936	49.9931	91.4243	83.4243
	2935	49.9787	91.3713	83.3713
	2934	49.965	91.3075	83.3075
	2933	49.9533	91.2347	83.2347
	2932	49.9439	91.1578	83.1578
	2931	49.9356	91.0789	83.0789
	2930	49.9267	90.9969	82.9969
	2929	49.9168	90.913	82.913
	2928	49.9074	90.8321	82.8321
	2927	49.901	90.7587	82.7587
	2926	49.8981	90.6923	82.6923
	2925	49.8972	90.6303	82.6303
	2924	49.8953	90.5725	82.5725
	2923	49.8904	90.5228	82.5228
	2922	49.8827	90.4859	82.4859
	2921	49.875	90.4646	82.4646
	2920	49.8703	90.4586	82.4586
	2919	49.8703	90.4653	82.4653
	2918	49.8738	90.4809	82.4809
	2917	49.8777	90.5017	82.5017
	2916	49.879	90.5254	82.5254
	2915	49.8766	90.5512	82.5512
	2914	49.8713	90.5787	82.5787
	2913	49.8646	90.608	82.608
	2912	49.8581	90.638	82.638
	2911	49.8523	90.6669	82.6669
	2910	49.8466	90.6924	82.6924
	2909	49.8401	90.7138	82.7138
	2908	49.8317	90.7325	82.7325
	2907	49.8215	90.7507	82.7507
	2906	49.8108	90.77	82.77
	2905	49.8011	90.7896	82.7896
	2904	49.7935	90.8081	82.8081
	2903	49.7885	90.8246	82.8246
	2902	49.7863	90.8398	82.8398
	2901	49.7865	90.8554	82.8554
	2900	49.788	90.8712	82.8712
	2899	49.7894	90.8851	82.8851
	2898	49.7893	90.8943	82.8943
	2897	49.7869	90.8986	82.8986
	2896	49.7819	90.9011	82.9011
	2895	49.7753	90.9069	82.9069
	2894	49.7687	90.9199	82.9199
	2893	49.7639	90.9397	82.9397
	2892	49.7612	90.9613	82.9613
	2891	49.76	90.9792	82.9792
	2890	49.7595	90.9921	82.9921
	2889	49.7591	91.0022	83.0022
	2888	49.7583	91.0117	83.0117
	2887	49.7556	91.0196	83.0196
	2886	49.7499	91.0248	83.0248
	2885	49.7413	91.0289	83.0289
	2884	49.7319	91.036	83.036
	2883	49.7243	91.0481	83.0481
	2882	49.7195	91.0633	83.0633
	2881	49.7163	91.0781	83.0781
	2880	49.7133	91.0893	83.0893
	2879	49.7103	91.0953	83.0953
	2878	49.708	91.0955	83.0955
	2877	49.707	91.091	83.091
	2876	49.7062	91.0829	83.0829
	2875	49.7044	91.072	83.072
	2874	49.7012	91.0589	83.0589
	2873	49.6967	91.0459	83.0459
	2872	49.6911	91.0372	83.0372
	2871	49.6841	91.0357	83.0357
	2870	49.6767	91.0398	83.0398
	2869	49.6703	91.0444	83.0444
	2868	49.6656	91.0444	83.0444
	2867	49.662	91.0371	83.0371
	2866	49.6584	91.0228	83.0228
	2865	49.6544	91.0038	83.0038
	2864	49.6501	90.9827	82.9827
	2863	49.6453	90.9611	82.9611
	2862	49.6392	90.938	82.938
	2861	49.6319	90.911	82.911
	2860	49.6243	90.8782	82.8782
	2859	49.6176	90.839	82.839
	2858	49.6121	90.7944	82.7944
	2857	49.6077	90.7467	82.7467
	2856	49.604	90.6992	82.6992
	2855	49.6012	90.6556	82.6556
	2854	49.5998	90.6182	82.6182
	2853	49.6	90.5884	82.5884
	2852	49.6017	90.567	82.567
	2851	49.6043	90.5554	82.5554
	2850	49.6066	90.5558	82.5558
	2849	49.6074	90.5691	82.5691
	2848	49.6057	90.5936	82.5936
	2847	49.6011	90.6252	82.6252
	2846	49.5943	90.6589	82.6589
	2845	49.5867	90.6915	82.6915
	2844	49.5797	90.7224	82.7224
	2843	49.5748	90.7522	82.7522
	2842	49.5725	90.7802	82.7802
	2841	49.5723	90.8052	82.8052
	2840	49.5735	90.8273	82.8273
	2839	49.5748	90.8488	82.8488
	2838	49.5758	90.8718	82.8718
	2837	49.5759	90.8966	82.8966
	2836	49.5746	90.9204	82.9204
	2835	49.5719	90.9399	82.9399
	2834	49.5683	90.9535	82.9535
	2833	49.5652	90.9628	82.9628
	2832	49.5645	90.9713	82.9713
	2831	49.5664	90.9822	82.9822
	2830	49.5699	90.9957	82.9957
	2829	49.5729	91.0095	83.0095
	2828	49.5738	91.0206	83.0206
	2827	49.5728	91.0291	83.0291
	2826	49.5714	91.0374	83.0374
	2825	49.5707	91.0477	83.0477
	2824	49.5706	91.0591	83.0591
	2823	49.5703	91.0689	83.0689
	2822	49.5697	91.0756	83.0756
	2821	49.5696	91.0802	83.0802
	2820	49.5703	91.0849	83.0849
	2819	49.5713	91.0914	83.0914
	2818	49.5721	91.1008	83.1008
	2817	49.5727	91.1128	83.1128
	2816	49.5737	91.1252	83.1252
	2815	49.5757	91.1347	83.1347
	2814	49.578	91.1398	83.1398
	2813	49.5798	91.1413	83.1413
	2812	49.5798	91.1409	83.1409
	2811	49.5783	91.1403	83.1403
	2810	49.5764	91.1413	83.1413
	2809	49.5757	91.1453	83.1453
	2808	49.5766	91.152	83.152
	2807	49.5779	91.1591	83.1591
	2806	49.5784	91.1642	83.1642
	2805	49.578	91.1677	83.1677
	2804	49.5779	91.1717	83.1717
	2803	49.5791	91.1776	83.1776
	2802	49.5809	91.185	83.185
	2801	49.582	91.192	83.192
	2800	49.5817	91.1965	83.1965
	2799	49.5802	91.1972	83.1972
	2798	49.5787	91.1946	83.1946
	2797	49.5781	91.1916	83.1916
	2796	49.5785	91.1917	83.1917
	2795	49.5796	91.1967	83.1967
	2794	49.5808	91.2052	83.2052
	2793	49.5818	91.2138	83.2138
	2792	49.5825	91.2205	83.2205
	2791	49.5827	91.2248	83.2248
	2790	49.5825	91.2278	83.2278
	2789	49.5813	91.2308	83.2308
	2788	49.5791	91.2346	83.2346
	2787	49.5764	91.2393	83.2393
	2786	49.5741	91.2449	83.2449
	2785	49.5728	91.2513	83.2513
	2784	49.5726	91.258	83.258
	2783	49.5727	91.2641	83.2641
	2782	49.5725	91.2689	83.2689
	2781	49.5721	91.2728	83.2728
	2780	49.5715	91.2762	83.2762
	2779	49.5707	91.2789	83.2789
	2778	49.5698	91.2801	83.2801
	2777	49.5687	91.2789	83.2789
	2776	49.5679	91.276	83.276
	2775	49.5673	91.273	83.273
	2774	49.5667	91.2713	83.2713
	2773	49.5657	91.2722	83.2722
	2772	49.5645	91.2757	83.2757
	2771	49.5634	91.2809	83.2809
	2770	49.5626	91.2861	83.2861
	2769	49.5621	91.2897	83.2897
	2768	49.5614	91.2913	83.2913
	2767	49.5604	91.2917	83.2917
	2766	49.5592	91.292	83.292
	2765	49.558	91.2928	83.2928
	2764	49.5569	91.2938	83.2938
	2763	49.556	91.2944	83.2944
	2762	49.5552	91.2947	83.2947
	2761	49.5544	91.2951	83.2951
	2760	49.5535	91.2962	83.2962
	2759	49.5525	91.2981	83.2981
	2758	49.5515	91.3004	83.3004
	2757	49.5506	91.3028	83.3028
	2756	49.5496	91.3048	83.3048
	2755	49.5486	91.3064	83.3064
	2754	49.5475	91.3076	83.3076
	2753	49.5464	91.3089	83.3089
	2752	49.5454	91.311	83.311
	2751	49.5444	91.3141	83.3141
	2750	49.5433	91.3177	83.3177
	2749	49.5424	91.3206	83.3206
	2748	49.5414	91.3216	83.3216
	2747	49.5404	91.3207	83.3207
	2746	49.5395	91.3186	83.3186
	2745	49.5385	91.3169	83.3169
	2744	49.5375	91.3164	83.3164
	2743	49.5365	91.3169	83.3169
	2742	49.5356	91.318	83.318
	2741	49.5347	91.3196	83.3196
	2740	49.5337	91.3217	83.3217
	2739	49.5328	91.3245	83.3245
	2738	49.5318	91.3274	83.3274
	2737	49.5307	91.3303	83.3303
	2736	49.5295	91.333	83.333
	2735	49.5284	91.3354	83.3354
	2734	49.5274	91.337	83.337
	2733	49.5265	91.338	83.338
	2732	49.5258	91.3389	83.3389
	2731	49.525	91.3404	83.3404
	2730	49.5241	91.3423	83.3423
	2729	49.5232	91.3438	83.3438
	2728	49.5225	91.3443	83.3443
	2727	49.522	91.3444	83.3444
	2726	49.5215	91.3448	83.3448
	2725	49.521	91.3461	83.3461
	2724	49.5202	91.3481	83.3481
	2723	49.519	91.3499	83.3499
	2722	49.517	91.3512	83.3512
	2721	49.5146	91.3521	83.3521
	2720	49.5122	91.3527	83.3527
	2719	49.5108	91.3534	83.3534
	2718	49.5104	91.3546	83.3546
	2717	49.5107	91.3561	83.3561
	2716	49.5106	91.3577	83.3577
	2715	49.5095	91.3591	83.3591
	2714	49.5077	91.3606	83.3606
	2713	49.506	91.3625	83.3625
	2712	49.5051	91.3646	83.3646
	2711	49.5055	91.3664	83.3664
	2710	49.507	91.367	83.367
	2709	49.5092	91.3664	83.3664
	2708	49.5112	91.3648	83.3648
	2707	49.5123	91.3624	83.3624
	2706	49.5117	91.3597	83.3597
	2705	49.5096	91.3578	83.3578
	2704	49.5065	91.3577	83.3577
	2703	49.5033	91.3596	83.3596
	2702	49.5005	91.3638	83.3638
	2701	49.498	91.3701	83.3701
	2700	49.4953	91.3767	83.3767
	2699	49.4925	91.3806	83.3806
	2698	49.4902	91.3798	83.3798
	2697	49.4893	91.3755	83.3755
	2696	49.49	91.3714	83.3714
	2695	49.4919	91.3698	83.3698
	2694	49.4936	91.3705	83.3705
	2693	49.4941	91.3723	83.3723
	2692	49.4928	91.3747	83.3747
	2691	49.4903	91.3777	83.3777
	2690	49.4882	91.3814	83.3814
	2689	49.4883	91.3849	83.3849
	2688	49.4905	91.3874	83.3874
	2687	49.493	91.3878	83.3878
	2686	49.4936	91.3858	83.3858
	2685	49.4917	91.3833	83.3833
	2684	49.4882	91.3836	83.3836
	2683	49.4843	91.3885	83.3885
	2682	49.4814	91.396	83.396
	2681	49.4809	91.4019	83.4019
	2680	49.4832	91.4035	83.4035
	2679	49.4875	91.4015	83.4015
	2678	49.4918	91.3987	83.3987
	2677	49.4943	91.397	83.397
	2676	49.4943	91.3963	83.3963
	2675	49.4924	91.3961	83.3961
	2674	49.4895	91.3966	83.3966
	2673	49.487	91.3982	83.3982
	2672	49.4857	91.4002	83.4002
	2671	49.4855	91.4015	83.4015
	2670	49.4856	91.4011	83.4011
	2669	49.485	91.4004	83.4004
	2668	49.4839	91.4011	83.4011
	2667	49.4838	91.404	83.404
	2666	49.4868	91.4077	83.4077
	2665	49.4939	91.411	83.411
	2664	49.5038	91.4148	83.4148
	2663	49.5144	91.4225	83.4225
	2662	49.5245	91.4373	83.4373
	2661	49.535	91.4583	83.4583
	2660	49.5468	91.4807	83.4807
	2659	49.5603	91.4989	83.4989
	2658	49.5756	91.5107	83.5107
	2657	49.5928	91.5185	83.5185
	2656	49.612	91.5265	83.5265
	2655	49.632	91.5377	83.5377
	2654	49.651	91.5528	83.5528
	2653	49.6677	91.5706	83.5706
	2652	49.6821	91.5885	83.5885
	2651	49.6953	91.6039	83.6039
	2650	49.7085	91.6158	83.6158
	2649	49.7231	91.6256	83.6256
	2648	49.7399	91.6369	83.6369
	2647	49.7593	91.6518	83.6518
	2646	49.781	91.6691	83.6691
	2645	49.8036	91.6862	83.6862
	2644	49.8246	91.7021	83.7021
	2643	49.8423	91.7194	83.7194
	2642	49.8575	91.7407	83.7407
	2641	49.8722	91.7652	83.7652
	2640	49.8875	91.788	83.788
	2639	49.9023	91.8043	83.8043
	2638	49.9154	91.8134	83.8134
	2637	49.9281	91.8183	83.8183
	2636	49.9421	91.8227	83.8227
	2635	49.9571	91.8283	83.8283
	2634	49.9707	91.8351	83.8351
	2633	49.9815	91.8434	83.8434
	2632	49.9908	91.8542	83.8542
	2631	50.0005	91.8674	83.8674
	2630	50.0112	91.8808	83.8808
	2629	50.0221	91.8919	83.8919
	2628	50.0318	91.8998	83.8998
	2627	50.0399	91.9066	83.9066
	2626	50.0469	91.9145	83.9145
	2625	50.0542	91.9242	83.9242
	2624	50.0636	91.9351	83.9351
	2623	50.0762	91.9464	83.9464
	2622	50.091	91.9574	83.9574
	2621	50.1057	91.9669	83.9669
	2620	50.1182	91.9733	83.9733
	2619	50.1276	91.9773	83.9773
	2618	50.1341	91.9819	83.9819
	2617	50.1386	91.9897	83.9897
	2616	50.1421	92.0005	84.0005
	2615	50.1454	92.0112	84.0112
	2614	50.1504	92.0181	84.0181
	2613	50.1591	92.0197	84.0197
	2612	50.1715	92.0177	84.0177
	2611	50.1848	92.0159	84.0159
	2610	50.1954	92.0171	84.0171
	2609	50.2019	92.0207	84.0207
	2608	50.2059	92.0238	84.0238
	2607	50.21	92.0254	84.0254
	2606	50.2159	92.0278	84.0278
	2605	50.2234	92.0331	84.0331
	2604	50.2317	92.0408	84.0408
	2603	50.2396	92.0483	84.0483
	2602	50.2471	92.0539	84.0539
	2601	50.2538	92.0582	84.0582
	2600	50.2592	92.0617	84.0617
	2599	50.2623	92.0654	84.0654
	2598	50.2632	92.0703	84.0703
	2597	50.2631	92.0771	84.0771
	2596	50.2633	92.0845	84.0845
	2595	50.2641	92.0902	84.0902
	2594	50.2657	92.0936	84.0936
	2593	50.2687	92.0956	84.0956
	2592	50.2737	92.0977	84.0977
	2591	50.2806	92.1006	84.1006
	2590	50.2885	92.1047	84.1047
	2589	50.2971	92.1098	84.1098
	2588	50.3062	92.1147	84.1147
	2587	50.3154	92.1179	84.1179
	2586	50.3242	92.1193	84.1193
	2585	50.332	92.1205	84.1205
	2584	50.3376	92.1235	84.1235
	2583	50.3402	92.128	84.128
	2582	50.3409	92.1324	84.1324
	2581	50.3427	92.1352	84.1352
	2580	50.3474	92.1365	84.1365
	2579	50.3528	92.1372	84.1372
	2578	50.3549	92.1383	84.1383
	2577	50.3523	92.1404	84.1404
	2576	50.3469	92.1437	84.1437
	2575	50.3425	92.1478	84.1478
	2574	50.341	92.1521	84.1521
	2573	50.342	92.1562	84.1562
	2572	50.3437	92.1601	84.1601
	2571	50.3442	92.1639	84.1639
	2570	50.3431	92.1678	84.1678
	2569	50.3424	92.1716	84.1716
	2568	50.3442	92.1747	84.1747
	2567	50.3486	92.1767	84.1767
	2566	50.3548	92.1782	84.1782
	2565	50.3618	92.18	84.18
	2564	50.3695	92.1827	84.1827
	2563	50.3771	92.1858	84.1858
	2562	50.383	92.1892	84.1892
	2561	50.3865	92.1928	84.1928
	2560	50.3883	92.1965	84.1965
	2559	50.3894	92.1999	84.1999
	2558	50.3898	92.2026	84.2026
	2557	50.3892	92.205	84.205
	2556	50.388	92.2076	84.2076
	2555	50.3875	92.2105	84.2105
	2554	50.3885	92.214	84.214
	2553	50.3904	92.2179	84.2179
	2552	50.392	92.2218	84.2218
	2551	50.3922	92.2251	84.2251
	2550	50.3911	92.2272	84.2272
	2549	50.3901	92.2285	84.2285
	2548	50.3909	92.2299	84.2299
	2547	50.3935	92.2317	84.2317
	2546	50.3965	92.2338	84.2338
	2545	50.3981	92.2358	84.2358
	2544	50.3979	92.2378	84.2378
	2543	50.397	92.2399	84.2399
	2542	50.3971	92.2421	84.2421
	2541	50.3991	92.2446	84.2446
	2540	50.4029	92.2474	84.2474
	2539	50.4071	92.2505	84.2505
	2538	50.4106	92.2538	84.2538
	2537	50.4124	92.2569	84.2569
	2536	50.4124	92.2596	84.2596
	2535	50.411	92.2618	84.2618
	2534	50.4096	92.2634	84.2634
	2533	50.4094	92.2649	84.2649
	2532	50.4106	92.2669	84.2669
	2531	50.4122	92.2691	84.2691
	2530	50.4133	92.2713	84.2713
	2529	50.4133	92.2731	84.2731
	2528	50.4126	92.2745	84.2745
	2527	50.4116	92.2758	84.2758
	2526	50.4108	92.2773	84.2773
	2525	50.4106	92.2791	84.2791
	2524	50.4115	92.2811	84.2811
	2523	50.4129	92.283	84.283
	2522	50.4143	92.2846	84.2846
	2521	50.4159	92.2862	84.2862
	2520	50.4181	92.2877	84.2877
	2519	50.4208	92.2893	84.2893
	2518	50.4236	92.2909	84.2909
	2517	50.4261	92.2925	84.2925
	2516	50.4281	92.2939	84.2939
	2515	50.4289	92.2952	84.2952
	2514	50.4281	92.2965	84.2965
	2513	50.426	92.2978	84.2978
	2512	50.4243	92.2991	84.2991
	2511	50.4241	92.3004	84.3004
	2510	50.4249	92.3015	84.3015
	2509	50.4256	92.3025	84.3025
	2508	50.4256	92.3033	84.3033
	2507	50.4256	92.3041	84.3041
	2506	50.4258	92.3053	84.3053
	2505	50.4267	92.3069	84.3069
	2504	50.4283	92.3083	84.3083
	2503	50.4311	92.3091	84.3091
	2502	50.4343	92.3094	84.3094
	2501	50.4368	92.3096	84.3096
	2500	50.4378	92.3102	84.3102
	2499	50.4379	92.3111	84.3111
	2498	50.4382	92.3124	84.3124
	2497	50.4393	92.3141	84.3141
	2496	50.4403	92.316	84.316
	2495	50.4407	92.318	84.318
	2494	50.4406	92.3194	84.3194
	2493	50.4403	92.3201	84.3201
	2492	50.4401	92.3201	84.3201
	2491	50.4403	92.3198	84.3198
	2490	50.4414	92.3197	84.3197
	2489	50.4442	92.32	84.32
	2488	50.4484	92.3205	84.3205
	2487	50.452	92.3212	84.3212
	2486	50.4531	92.3222	84.3222
	2485	50.4516	92.3238	84.3238
	2484	50.4492	92.3258	84.3258
	2483	50.4473	92.3278	84.3278
	2482	50.4457	92.3293	84.3293
	2481	50.444	92.3303	84.3303
	2480	50.4428	92.331	84.331
	2479	50.4425	92.3316	84.3316
	2478	50.4433	92.3323	84.3323
	2477	50.4447	92.3335	84.3335
	2476	50.4466	92.3356	84.3356
	2475	50.4485	92.338	84.338
	2474	50.4495	92.3403	84.3403
	2473	50.4491	92.3422	84.3422
	2472	50.4477	92.3434	84.3434
	2471	50.447	92.3442	84.3442
	2470	50.448	92.3448	84.3448
	2469	50.4512	92.3456	84.3456
	2468	50.456	92.347	84.347
	2467	50.4614	92.3488	84.3488
	2466	50.466	92.3506	84.3506
	2465	50.4692	92.3521	84.3521
	2464	50.4708	92.3531	84.3531
	2463	50.4714	92.3541	84.3541
	2462	50.4712	92.3551	84.3551
	2461	50.4711	92.3561	84.3561
	2460	50.4714	92.3569	84.3569
	2459	50.4724	92.3573	84.3573
	2458	50.4739	92.3576	84.3576
	2457	50.4751	92.3582	84.3582
	2456	50.4753	92.3593	84.3593
	2455	50.4746	92.3608	84.3608
	2454	50.4736	92.3623	84.3623
	2453	50.4737	92.3632	84.3632
	2452	50.4755	92.3636	84.3636
	2451	50.4784	92.364	84.364
	2450	50.481	92.3648	84.3648
	2449	50.4823	92.3662	84.3662
	2448	50.4823	92.368	84.368
	2447	50.4813	92.3699	84.3699
	2446	50.4798	92.3715	84.3715
	2445	50.4784	92.3726	84.3726
	2444	50.4778	92.3733	84.3733
	2443	50.4782	92.3738	84.3738
	2442	50.4793	92.3741	84.3741
	2441	50.4807	92.3741	84.3741
	2440	50.4823	92.3736	84.3736
	2439	50.484	92.3726	84.3726
	2438	50.4851	92.3722	84.3722
	2437	50.4851	92.3728	84.3728
	2436	50.4839	92.3745	84.3745
	2435	50.4816	92.3765	84.3765
	2434	50.4787	92.3781	84.3781
	2433	50.4761	92.3788	84.3788
	2432	50.4747	92.3788	84.3788
	2431	50.4748	92.3785	84.3785
	2430	50.4761	92.3779	84.3779
	2429	50.4778	92.3771	84.3771
	2428	50.479	92.3763	84.3763
	2427	50.4789	92.3757	84.3757
	2426	50.4768	92.3755	84.3755
	2425	50.473	92.3758	84.3758
	2424	50.4689	92.3765	84.3765
	2423	50.466	92.377	84.377
	2422	50.4649	92.377	84.377
	2421	50.4652	92.3767	84.3767
	2420	50.4664	92.3764	84.3764
	2419	50.4684	92.3761	84.3761
	2418	50.4704	92.3757	84.3757
	2417	50.4715	92.3752	84.3752
	2416	50.4713	92.375	84.375
	2415	50.4698	92.3754	84.3754
	2414	50.4671	92.376	84.376
	2413	50.4633	92.3766	84.3766
	2412	50.4587	92.377	84.377
	2411	50.4541	92.3774	84.3774
	2410	50.45	92.3776	84.3776
	2409	50.447	92.3778	84.3778
	2408	50.4459	92.3782	84.3782
	2407	50.4472	92.3787	84.3787
	2406	50.4495	92.3791	84.3791
	2405	50.4501	92.3793	84.3793
	2404	50.4472	92.3789	84.3789
	2403	50.4423	92.3782	84.3782
	2402	50.4389	92.3775	84.3775
	2401	50.4388	92.377	84.377
	2400	50.4402	92.377	84.377
	2399	50.4403	92.3778	84.3778
	2398	50.4381	92.3792	84.3792
	2397	50.4346	92.3811	84.3811
	2396	50.4313	92.3825	84.3825
	2395	50.4286	92.3823	84.3823
	2394	50.4258	92.38	84.38
	2393	50.4221	92.3769	84.3769
	2392	50.4174	92.3743	84.3743
	2391	50.4115	92.3732	84.3732
	2390	50.4036	92.3738	84.3738
	2389	50.3942	92.3755	84.3755
	2388	50.3853	92.3776	84.3776
	2387	50.3801	92.3785	84.3785
	2386	50.3803	92.3771	84.3771
	2385	50.3844	92.3736	84.3736
	2384	50.388	92.3695	84.3695
	2383	50.3864	92.3668	84.3668
	2382	50.3784	92.367	84.367
	2381	50.367	92.3706	84.3706
	2380	50.3569	92.3767	84.3767
	2379	50.3501	92.3827	84.3827
	2378	50.3454	92.3864	84.3864
	2377	50.3414	92.3872	84.3872
	2376	50.3397	92.3854	84.3854
	2375	50.3427	92.3816	84.3816
	2374	50.3493	92.3765	84.3765
	2373	50.355	92.3727	84.3727
	2372	50.3559	92.3728	84.3728
	2371	50.3516	92.3773	84.3773
	2370	50.3445	92.3835	84.3835
	2369	50.3369	92.3883	84.3883
	2368	50.3292	92.3918	84.3918
	2367	50.3193	92.3954	84.3954
	2366	50.3052	92.3992	84.3992
	2365	50.2871	92.4012	84.4012
	2364	50.2666	92.4002	84.4002
	2363	50.2471	92.3954	84.3954
	2362	50.23	92.3869	84.3869
	2361	50.2128	92.3779	84.3779
	2360	50.1934	92.3705	84.3705
	2359	50.169	92.366	84.366
	2358	50.1419	92.3631	84.3631
	2357	50.1175	92.357	84.357
	2356	50.0966	92.3481	84.3481
	2355	50.076	92.3344	84.3344
	2354	50.0558	92.3169	84.3169
	2353	50.0455	92.3037	84.3037
	2352	50.052	92.3018	84.3018
	2351	50.0768	92.3074	84.3074
	2350	50.1162	92.3108	84.3108
	2349	50.16	92.317	84.317
	2348	50.1993	92.3345	84.3345
	2347	50.2287	92.3642	84.3642
	2346	50.2443	92.3995	84.3995
	2345	50.2423	92.4259	84.4259
	2344	50.2276	92.4295	84.4295
	2343	50.2108	92.4075	84.4075
	2342	50.1955	92.3792	84.3792
	2341	50.1821	92.3592	84.3592
	2340	50.1704	92.3439	84.3439
	2339	50.16	92.3287	84.3287
	2338	50.1491	92.314	84.314
	2337	50.1375	92.3033	84.3033
	2336	50.1259	92.2959	84.2959
	2335	50.1163	92.2893	84.2893
	2334	50.1097	92.2812	84.2812
	2333	50.1086	92.2751	84.2751
	2332	50.112	92.2737	84.2737
	2331	50.1169	92.2769	84.2769
	2330	50.1225	92.2757	84.2757
	2329	50.1285	92.2692	84.2692
	2328	50.1375	92.2589	84.2589
	2327	50.1494	92.2518	84.2518
	2326	50.166	92.253	84.253
	2325	50.187	92.2626	84.2626
	2324	50.209	92.279	84.279
	2323	50.2267	92.295	84.295
	2322	50.2375	92.3071	84.3071
	2321	50.2466	92.3149	84.3149
	2320	50.2604	92.3192	84.3192
	2319	50.2805	92.3231	84.3231
	2318	50.3013	92.3273	84.3273
	2317	50.3158	92.335	84.335
	2316	50.322	92.3443	84.3443
	2315	50.3237	92.3552	84.3552
	2314	50.3287	92.3656	84.3656
	2313	50.3426	92.3769	84.3769
	2312	50.3647	92.3885	84.3885
	2311	50.3879	92.4003	84.4003
	2310	50.4063	92.4106	84.4106
	2309	50.419	92.4191	84.4191
	2308	50.4307	92.4242	84.4242
	2307	50.4443	92.426	84.426
	2306	50.4593	92.4276	84.4276
	2305	50.4732	92.4337	84.4337
	2304	50.4842	92.4452	84.4452
	2303	50.4917	92.4587	84.4587
	2302	50.4967	92.4706	84.4706
	2301	50.5011	92.4823	84.4823
	2300	50.5071	92.4954	84.4954
	2299	50.5157	92.5109	84.5109
	2298	50.5278	92.5254	84.5254
	2297	50.5432	92.5369	84.5369
	2296	50.5608	92.5442	84.5442
	2295	50.5761	92.5491	84.5491
	2294	50.5847	92.5551	84.5551
	2293	50.5859	92.5653	84.5653
	2292	50.584	92.5796	84.5796
	2291	50.5843	92.5938	84.5938
	2290	50.5898	92.6042	84.6042
	2289	50.5994	92.6102	84.6102
	2288	50.6101	92.6139	84.6139
	2287	50.6193	92.6175	84.6175
	2286	50.6267	92.6231	84.6231
	2285	50.6353	92.6311	84.6311
	2284	50.6481	92.6401	84.6401
	2283	50.6653	92.6472	84.6472
	2282	50.6836	92.6515	84.6515
	2281	50.6987	92.6559	84.6559
	2280	50.7073	92.6641	84.6641
	2279	50.709	92.6762	84.6762
	2278	50.706	92.688	84.688
	2277	50.7026	92.6951	84.6951
	2276	50.7014	92.6966	84.6966
	2275	50.7012	92.6964	84.6964
	2274	50.701	92.6997	84.6997
	2273	50.7025	92.709	84.709
	2272	50.7074	92.7219	84.7219
	2271	50.7134	92.7328	84.7328
	2270	50.7153	92.7383	84.7383
	2269	50.7119	92.7387	84.7387
	2268	50.7068	92.7373	84.7373
	2267	50.7045	92.7362	84.7362
	2266	50.7058	92.7357	84.7357
	2265	50.7092	92.7353	84.7353
	2264	50.7141	92.7352	84.7352
	2263	50.7203	92.7366	84.7366
	2262	50.7268	92.7404	84.7404
	2261	50.7326	92.7462	84.7462
	2260	50.7385	92.7525	84.7525
	2259	50.7459	92.7575	84.7575
	2258	50.7545	92.7611	84.7611
	2257	50.7627	92.7645	84.7645
	2256	50.7685	92.7682	84.7682
	2255	50.7718	92.7712	84.7712
	2254	50.7737	92.7729	84.7729
	2253	50.7755	92.7737	84.7737
	2252	50.7779	92.7741	84.7741
	2251	50.7809	92.7744	84.7744
	2250	50.7854	92.7754	84.7754
	2249	50.7916	92.7786	84.7786
	2248	50.7974	92.7848	84.7848
	2247	50.799	92.7926	84.7926
	2246	50.7956	92.7996	84.7996
	2245	50.7906	92.8038	84.8038
	2244	50.7877	92.8046	84.8046
	2243	50.7872	92.8029	84.8029
	2242	50.7874	92.8001	84.8001
	2241	50.7885	92.7977	84.7977
	2240	50.7922	92.7967	84.7967
	2239	50.798	92.7974	84.7974
	2238	50.8028	92.7997	84.7997
	2237	50.8045	92.8028	84.8028
	2236	50.8046	92.8057	84.8057
	2235	50.8062	92.8075	84.8075
	2234	50.8103	92.8083	84.8083
	2233	50.8148	92.8095	84.8095
	2232	50.8162	92.8122	84.8122
	2231	50.8127	92.8168	84.8168
	2230	50.8063	92.8218	84.8218
	2229	50.8014	92.8256	84.8256
	2228	50.8011	92.828	84.828
	2227	50.8048	92.8297	84.8297
	2226	50.8092	92.8313	84.8313
	2225	50.8137	92.8324	84.8324
	2224	50.8198	92.8321	84.8321
	2223	50.8278	92.8306	84.8306
	2222	50.8348	92.8301	84.8301
	2221	50.8381	92.8323	84.8323
	2220	50.8378	92.836	84.836
	2219	50.8361	92.8383	84.8383
	2218	50.8339	92.8395	84.8395
	2217	50.8306	92.8431	84.8431
	2216	50.826	92.8511	84.8511
	2215	50.8205	92.861	84.861
	2214	50.8154	92.8684	84.8684
	2213	50.8123	92.8714	84.8714
	2212	50.8131	92.8706	84.8706
	2211	50.8188	92.8677	84.8677
	2210	50.8288	92.8662	84.8662
	2209	50.8409	92.8698	84.8698
	2208	50.852	92.8781	84.8781
	2207	50.8596	92.8852	84.8852
	2206	50.8633	92.8861	84.8861
	2205	50.8644	92.8817	84.8817
	2204	50.8643	92.8773	84.8773
	2203	50.8619	92.8765	84.8765
	2202	50.8563	92.879	84.879
	2201	50.8499	92.8835	84.8835
	2200	50.8467	92.8883	84.8883
	2199	50.8474	92.8907	84.8907
	2198	50.8492	92.8912	84.8912
	2197	50.8498	92.8945	84.8945
	2196	50.8504	92.9048	84.9048
	2195	50.8521	92.9207	84.9207
	2194	50.8539	92.9369	84.9369
	2193	50.8545	92.9513	84.9513
	2192	50.8548	92.9627	84.9627
	2191	50.8562	92.9672	84.9672
	2190	50.8594	92.962	84.962
	2189	50.8652	92.9513	84.9513
	2188	50.8756	92.9432	84.9432
	2187	50.8905	92.9392	84.9392
	2186	50.9054	92.9342	84.9342
	2185	50.9138	92.926	84.926
	2184	50.9114	92.9192	84.9192
	2183	50.8997	92.9184	84.9184
	2182	50.8857	92.9229	84.9229
	2181	50.8774	92.9283	84.9283
	2180	50.8774	92.931	84.931
	2179	50.8809	92.929	84.929
	2178	50.8818	92.9225	84.9225
	2177	50.8779	92.9145	84.9145
	2176	50.8718	92.9097	84.9097
	2175	50.8668	92.9104	84.9104
	2174	50.8655	92.9144	84.9144
	2173	50.8679	92.9174	84.9174
	2172	50.8704	92.9168	84.9168
	2171	50.8683	92.9136	84.9136
	2170	50.8639	92.9111	84.9111
	2169	50.8662	92.9119	84.9119
	2168	50.8802	92.9156	84.9156
	2167	50.8982	92.9192	84.9192
	2166	50.9097	92.9198	84.9198
	2165	50.917	92.9179	84.9179
	2164	50.9319	92.9164	84.9164
	2163	50.9582	92.9171	84.9171
	2162	50.9848	92.9189	84.9189
	2161	50.9985	92.919	84.919
	2160	50.9941	92.9159	84.9159
	2159	50.9705	92.9101	84.9101
	2158	50.9309	92.9038	84.9038
	2157	50.8889	92.899	84.899
	2156	50.8617	92.8957	84.8957
	2155	50.8523	92.8924	84.8924
	2154	50.8498	92.8889	84.8889
	2153	50.8461	92.8869	84.8869
	2152	50.8444	92.8873	84.8873
	2151	50.8506	92.8892	84.8892
	2150	50.8624	92.8904	84.8904
	2149	50.8725	92.8897	84.8897
	2148	50.8772	92.8872	84.8872
	2147	50.8786	92.8835	84.8835
	2146	50.8799	92.8798	84.8798
	2145	50.8826	92.8772	84.8772
	2144	50.8852	92.8762	84.8762
	2143	50.8842	92.8762	84.8762
	2142	50.8767	92.8758	84.8758
	2141	50.864	92.8744	84.8744
	2140	50.8504	92.8731	84.8731
	2139	50.8394	92.8726	84.8726
	2138	50.8317	92.873	84.873
	2137	50.8274	92.8745	84.8745
	2136	50.8265	92.8769	84.8769
	2135	50.8269	92.8795	84.8795
	2134	50.8258	92.8809	84.8809
	2133	50.8239	92.881	84.881
	2132	50.824	92.8803	84.8803
	2131	50.8261	92.8787	84.8787
	2130	50.8269	92.8762	84.8762
	2129	50.8246	92.873	84.873
	2128	50.821	92.871	84.871
	2127	50.8191	92.8715	84.8715
	2126	50.8205	92.8742	84.8742
	2125	50.826	92.8774	84.8774
	2124	50.8356	92.8801	84.8801
	2123	50.8455	92.8822	84.8822
	2122	50.8503	92.8847	84.8847
	2121	50.8477	92.8879	84.8879
	2120	50.8418	92.8914	84.8914
	2119	50.8392	92.8943	84.8943
	2118	50.8434	92.8959	84.8959
	2117	50.8535	92.8968	84.8968
	2116	50.8657	92.8981	84.8981
	2115	50.8753	92.9007	84.9007
	2114	50.8792	92.9046	84.9046
	2113	50.8781	92.9088	84.9088
	2112	50.8754	92.9124	84.9124
	2111	50.8735	92.915	84.915
	2110	50.8721	92.9168	84.9168
	2109	50.8708	92.9184	84.9184
	2108	50.8705	92.9202	84.9202
	2107	50.8726	92.9224	84.9224
	2106	50.8768	92.9252	84.9252
	2105	50.8814	92.9287	84.9287
	2104	50.8847	92.9323	84.9323
	2103	50.886	92.9357	84.9357
	2102	50.8857	92.9388	84.9388
	2101	50.8846	92.9416	84.9416
	2100	50.884	92.9444	84.9444
	2099	50.8846	92.9473	84.9473
	2098	50.8865	92.9506	84.9506
	2097	50.8894	92.9542	84.9542
	2096	50.8922	92.958	84.958
	2095	50.8937	92.9615	84.9615
	2094	50.8938	92.9643	84.9643
	2093	50.8936	92.9668	84.9668
	2092	50.8948	92.97	84.97
	2091	50.8976	92.9741	84.9741
	2090	50.9012	92.9785	84.9785
	2089	50.905	92.9826	84.9826
	2088	50.9086	92.9868	84.9868
	2087	50.9121	92.9918	84.9918
	2086	50.9149	92.9976	84.9976
	2085	50.9169	93.003	85.003
	2084	50.9179	93.0074	85.0074
	2083	50.9181	93.0101	85.0101
	2082	50.9179	93.0113	85.0113
	2081	50.9186	93.0122	85.0122
	2080	50.9212	93.0147	85.0147
	2079	50.9254	93.0193	85.0193
	2078	50.9296	93.0242	85.0242
	2077	50.9325	93.0278	85.0278
	2076	50.9347	93.031	85.031
	2075	50.9374	93.0357	85.0357
	2074	50.9407	93.0419	85.0419
	2073	50.9442	93.0487	85.0487
	2072	50.9477	93.0552	85.0552
	2071	50.9515	93.0611	85.0611
	2070	50.9562	93.0659	85.0659
	2069	50.9613	93.07	85.07
	2068	50.965	93.0737	85.0737
	2067	50.9658	93.0767	85.0767
	2066	50.964	93.0784	85.0784
	2065	50.9625	93.0804	85.0804
	2064	50.9637	93.0845	85.0845
	2063	50.9672	93.0898	85.0898
	2062	50.9704	93.0938	85.0938
	2061	50.9719	93.0957	85.0957
	2060	50.9731	93.0972	85.0972
	2059	50.9759	93.0988	85.0988
	2058	50.9811	93.1001	85.1001
	2057	50.9885	93.1023	85.1023
	2056	50.9966	93.1075	85.1075
	2055	51.0031	93.1159	85.1159
	2054	51.0068	93.1255	85.1255
	2053	51.0084	93.1359	85.1359
	2052	51.0099	93.1484	85.1484
	2051	51.0121	93.1624	85.1624
	2050	51.0141	93.1745	85.1745
	2049	51.0155	93.1818	85.1818
	2048	51.0171	93.1837	85.1837
	2047	51.019	93.1812	85.1812
	2046	51.0207	93.1759	85.1759
	2045	51.0218	93.172	85.172
	2044	51.0232	93.1748	85.1748
	2043	51.0257	93.1856	85.1856
	2042	51.0288	93.2003	85.2003
	2041	51.0316	93.2122	85.2122
	2040	51.0338	93.2184	85.2184
	2039	51.0362	93.22	85.22
	2038	51.0394	93.2185	85.2185
	2037	51.0433	93.214	85.214
	2036	51.0467	93.2071	85.2071
	2035	51.0485	93.2002	85.2002
	2034	51.0488	93.1964	85.1964
	2033	51.0488	93.1982	85.1982
	2032	51.0494	93.2046	85.2046
	2031	51.0501	93.2103	85.2103
	2030	51.0503	93.2106	85.2106
	2029	51.0513	93.2054	85.2054
	2028	51.0543	93.1999	85.1999
	2027	51.0584	93.1983	85.1983
	2026	51.0613	93.2008	85.2008
	2025	51.0625	93.2049	85.2049
	2024	51.0637	93.2075	85.2075
	2023	51.066	93.2069	85.2069
	2022	51.069	93.2032	85.2032
	2021	51.0722	93.1989	85.1989
	2020	51.0759	93.1969	85.1969
	2019	51.0795	93.1973	85.1973
	2018	51.0813	93.1973	85.1973
	2017	51.0806	93.1957	85.1957
	2016	51.0794	93.1944	85.1944
	2015	51.0796	93.1952	85.1952
	2014	51.0815	93.197	85.197
	2013	51.0844	93.1977	85.1977
	2012	51.0884	93.1966	85.1966
	2011	51.0936	93.1942	85.1942
	2010	51.0989	93.1912	85.1912
	2009	51.1028	93.1894	85.1894
	2008	51.1045	93.1905	85.1905
	2007	51.1035	93.193	85.193
	2006	51.1001	93.1926	85.1926
	2005	51.0962	93.1874	85.1874
	2004	51.0944	93.1798	85.1798
	2003	51.0956	93.1736	85.1736
	2002	51.0981	93.171	85.171
[truncated: 1,552 more rows]

## Sheet: VSMnano
	0	-0.29097	-0.09699	-0.06699
	100	8.81823	2.93941	-0.06059
	200	14.4402	4.8134	1.8134
	300	18.4513	6.15043	3.15043
	400	21.5514	7.18379	4.18379
	500	24.0047	8.00156	5.00156
	600	26.048	8.68265	5.68265
	700	27.7892	9.26308	6.26308
	800	29.2507	9.75023	6.75023
	900	30.556	10.1853	7.18534
	1000	31.7216	10.5739	7.57388
	1100	32.7524	10.9175	7.91746
	1200	33.6752	11.2251	8.22506
	1300	34.5719	11.524	8.52397
	1400	35.3126	11.7709	8.77087
	1500	36.0255	12.0085	9.0085
	1600	36.7336	12.2445	9.24453
	1700	37.3695	12.4565	9.4565
	1800	37.8807	12.6269	9.6269
	1900	38.4537	12.8179	9.81791
	2000	38.9731	12.991	9.99104
	2100	39.4362	13.1454	10.1454
	2200	39.9463	13.3154	10.3154
	2300	40.3991	13.4664	10.4664
	2400	40.7799	13.5933	10.5933
	2500	41.2044	13.7348	10.7348
	2600	41.5849	13.8616	10.8616
	2700	41.9643	13.9881	10.9881
	2800	42.3614	14.1205	11.1205
	2900	42.6608	14.2203	11.2203
	3000	42.9896	14.3299	11.3299
	3600	45.19	15.0633	12.0633
	4200	47.2141	15.738	12.738
	4800	48.489	16.163	13.163
	5400	48.671	16.2237	13.2237
	6000	50.1925	16.7308	13.7308
	6600	51.3982	17.1327	14.1327
	7200	51.4822	17.1607	14.1607
	7800	52.0889	17.363	14.363
	8400	52.838	17.6127	14.6127
	9000	53.5666	17.8555	14.8555
	10000	54.6872	18.2291	15.2291
	11000	55.6773	18.5591	15.5591
	12000	56.6583	18.8861	15.8861
	13000	57.7428	19.2476	16.2476
	14000	60.0604	20.0201	17.0201
	15000	62.3781	20.7927	17.7927
	14000	59.8171	19.939	16.939
	13000	57.9287	19.3096	16.3096
	12000	56.847	18.949	15.949
	11000	55.7163	18.5721	15.5721
	10000	54.6631	18.221	15.221
	9000	53.6025	17.8675	14.8675
	8400	52.8855	17.6285	14.6285
	7800	52.1618	17.3873	14.3873
	7200	51.4396	17.1465	14.1465
	6600	50.6731	16.891	13.891
	6000	49.7701	16.59	13.59
	5400	48.7809	16.2603	13.2603
	4800	47.6321	15.8774	12.8774
	4200	46.3841	15.4614	12.4614
	3600	44.8959	14.9653	11.9653
	3000	43.121	14.3737	11.3737
	2900	42.7861	14.2621	11.2621
	2800	42.4477	14.1492	11.1492
	2700	42.2279	14.076	11.076
	2600	41.7413	13.9138	10.9138
	2500	41.3705	13.7902	10.7902
	2400	41.3183	13.7728	10.7728
	2300	40.4754	13.4918	10.4918
	2200	40.0474	13.3491	10.3491
	2100	39.576	13.192	10.192
	2000	39.0786	13.0262	10.0262
	1900	38.5339	12.8446	9.84464
	1800	38.0108	12.6702	9.67025
	1700	37.4694	12.4898	9.4898
	1600	36.8711	12.2904	9.29036
	1500	36.1944	12.0648	9.06481
	1400	35.4667	11.8222	8.82224
	1300	34.682	11.5607	8.56065
	1200	33.8436	11.2812	8.28121
	1100	32.8928	10.9643	7.96428
	1000	31.8475	10.6159	7.61585
	900	30.7111	10.237	7.23705
	800	29.4089	9.80298	6.80298
	700	27.9369	9.31231	6.31231
	600	26.201	8.73366	5.73366
	500	24.142	8.04735	5.04735
	400	21.6769	7.22564	4.22564
	300	18.5723	6.19076	3.19076
	200	14.555	4.85167	1.85167
	100	8.98368	2.99456	-0.00544
	0	0.29097	0.09699	-2.90301
	-100	-8.44608	-2.81536	0.18464
	-200	-13.8685	-4.62285	-1.62285
	-300	-17.8611	-5.95371	-2.95371
	-400	-20.9069	-6.96898	-3.96898
	-500	-23.3673	-7.78911	-4.78911
	-600	-25.3936	-8.46453	-5.46453
	-700	-27.0024	-9.0008	-6.0008
	-800	-28.5	-9.49999	-6.49999
	-900	-29.8095	-9.9365	-6.9365
	-1000	-30.9476	-10.3159	-7.31586
	-1100	-31.9677	-10.6559	-7.65591
	-1200	-32.9197	-10.9732	-7.97323
	-1300	-33.7133	-11.2378	-8.23776
	-1400	-34.5349	-11.5116	-8.51163
	-1500	-35.2616	-11.7539	-8.75388
	-1600	-35.7983	-11.9328	-8.93275
	-1700	-36.2023	-12.0674	-9.06742
	-1800	-38.109	-12.703	-9.703
	-1900	-38.109	-12.703	-9.703
	-2000	-38.109	-12.703	-9.703
	-2100	-38.5815	-12.8605	-9.86049
	-2200	-39.0934	-13.0311	-10.0311
	-2300	-39.5376	-13.1792	-10.1792
	-2400	-39.9368	-13.3123	-10.3123
	-2500	-40.3654	-13.4551	-10.4551
	-2600	-40.7111	-13.5703	-10.5703
	-2700	-41.1516	-13.7172	-10.7172
	-2800	-41.477	-13.8257	-10.8257
	-2900	-41.3733	-13.7911	-10.7911
	-3600	-43.9292	-14.6431	-11.6431
	-4200	-45.4384	-15.1461	-12.1461
	-4800	-46.7265	-15.5755	-12.5755
	-5400	-47.8666	-15.9556	-12.9556
	-6000	-48.8002	-16.2667	-13.2667
	-6600	-49.872	-16.624	-13.624
	-7200	-50.7494	-16.9165	-13.9165
	-7800	-50.7102	-16.9034	-13.9034
	-8400	-52.1852	-17.3951	-14.3951
	-9000	-52.9244	-17.6415	-14.6415
	-10000	-54.0638	-18.0213	-15.0213
	-11000	-55.1651	-18.3884	-15.3884
	-12000	-56.2555	-18.7518	-15.7518
	-13000	-57.4871	-19.1624	-16.1624
	-14000	-59.7133	-19.9044	-16.9044
	-15000	-61.9394	-20.6465	-17.6465
	-14000	-59.605	-19.8683	-16.8683
	-13000	-57.7009	-19.2336	-16.2336
	-12000	-56.4087	-18.8029	-15.8029
	-11000	-55.2284	-18.4095	-15.4095
	-10000	-54.1715	-18.0572	-15.0572
	-9000	-52.0982	-17.3661	-14.3661
	-8400	-51.4035	-17.1345	-14.1345
	-7800	-51.4406	-17.1469	-14.1469
	-7200	-50.8009	-16.9336	-13.9336
	-6600	-49.9269	-16.6423	-13.6423
	-6000	-48.982	-16.3273	-13.3273
	-5400	-47.9668	-15.9889	-12.9889
	-4800	-46.7783	-15.5928	-12.5928
	-4200	-45.5179	-15.1727	-12.1727
	-3600	-44.0763	-14.6921	-11.6921
	-3000	-42.2506	-14.0835	-11.0835
	-2900	-41.9159	-13.972	-10.972
	-2800	-41.5659	-13.8553	-10.8553
	-2700	-41.2392	-13.7464	-10.7464
	-2600	-40.8596	-13.6199	-10.6199
	-2500	-40.4449	-13.4816	-10.4816
	-2400	-39.9605	-13.3201	-10.3201
	-2300	-39.6729	-13.2243	-10.2243
	-2200	-39.1975	-13.0658	-10.0658
	-2100	-38.7223	-12.9074	-9.90744
	-2000	-38.2506	-12.7502	-9.75019
	-1900	-37.6893	-12.5631	-9.56309
	-1800	-37.1515	-12.3838	-9.38382
	-1700	-36.5849	-12.195	-9.19497
	-1600	-35.9541	-11.9847	-8.98471
	-1500	-35.3827	-11.7942	-8.79424
	-1400	-34.6368	-11.5456	-8.5456
	-1300	-33.8688	-11.2896	-8.2896
	-1200	-33.01	-11.0033	-8.00333
	-1100	-32.0863	-10.6954	-7.69544
	-1000	-31.0473	-10.3491	-7.34909
	-900	-29.8907	-9.96355	-6.96355
	-800	-28.6228	-9.54094	-6.54094
	-700	-27.1352	-9.04508	-6.04508
	-600	-25.5091	-8.50305	-5.50305
	-500	-23.4758	-7.82528	-4.82528
	-400	-21.0096	-7.00321	-4.00321
	-300	-17.9488	-5.98293	-2.98293
	-200	-13.9637	-4.65458	-1.65458
	-100	-8.52636	-2.84212	0.15788
	0	-0.29097	-0.09699	2.90301

## Sheet: XRDnano
	5	16.2563
	5.02	38.025
	5.04	27.225
	5.06	16.2563
	5.08	32.4
	5.1	16.2563
	5.12	27.225
	5.14	61.2563
	5.16	27.225
	5.18	32.4
	5.2	50.625
	5.22	27.225
	5.24	11.025
	5.26	44.1
	5.28	5.625
	5.3	27.225
	5.32	44.1
	5.34	32.4
	5.36	22.5
	5.38	44.1
	5.4	22.5
	5.42	27.225
	5.44	50.625
	5.46	22.5
	5.48	50.625
	5.5	27.225
	5.52	22.5
	5.54	27.225
	5.56	32.4
	5.58	16.2563
	5.6	32.4
	5.62	16.2563
	5.64	44.1
	5.66	27.225
	5.68	5.625
	5.7	22.5
	5.72	50.625
	5.74	50.625
	5.76	22.5
	5.78	32.4
	5.8	5.625
	5.82	38.025
	5.84	16.2563
	5.86	50.625
	5.88	50.625
	5.9	32.4
	5.92	16.2563
	5.94	44.1
	5.96	11.025
	5.98	22.5
	6	32.4
	6.02	27.225
	6.04	16.2563
	6.06	38.025
	6.08	22.5
	6.1	16.2563
	6.12	16.2563
	6.14	27.225
	6.16	32.4
	6.18	50.625
	6.2	16.2563
	6.22	22.5
	6.24	44.1
	6.26	57.6
	6.28	22.5
	6.3	38.025
	6.32	32.4
	6.34	32.4
	6.36	32.4
	6.38	16.2563
	6.4	38.025
	6.42	22.5
	6.44	27.225
	6.46	44.1
	6.48	27.225
	6.5	38.025
	6.52	72.9
	6.54	32.4
	6.56	16.2563
	6.58	57.6
	6.6	22.5
	6.62	32.4
	6.64	27.225
	6.66	50.625
	6.68	32.4
	6.7	44.1
	6.72	22.5
	6.74	32.4
	6.76	38.025
	6.78	27.225
	6.8	22.5
	6.82	38.025
	6.84	57.6
	6.86	50.625
	6.88	50.625
	6.9	22.5
	6.92	38.025
	6.94	27.225
	6.96	72.9
	6.98	27.225
	7	5.625
	7.02	50.625
	7.04	44.1
	7.06	32.4
	7.08	11.025
	7.1	27.225
	7.12	22.5
	7.14	38.025
	7.16	16.2563
	7.18	38.025
	7.2	27.225
	7.22	32.4
	7.24	44.1
	7.26	16.2563
	7.28	32.4
	7.3	11.025
	7.32	32.4
	7.34	50.625
	7.36	27.225
	7.38	11.025
	7.4	44.1
	7.42	0
	7.44	27.225
	7.46	16.2563
	7.48	38.025
	7.5	50.625
	7.52	27.225
	7.54	22.5
	7.56	38.025
	7.58	22.5
	7.6	22.5
	7.62	16.2563
	7.64	38.025
	7.66	16.2563
	7.68	27.225
	7.7	22.5
	7.72	44.1
	7.74	38.025
	7.76	27.225
	7.78	27.225
	7.8	32.4
	7.82	32.4
	7.84	32.4
	7.86	22.5
	7.88	11.025
	7.9	61.2563
	7.92	22.5
	7.94	32.4
	7.96	38.025
	7.98	44.1
	8	27.225
	8.02	22.5
	8.04	61.2563
	8.06	44.1
	8.08	22.5
	8.1	16.2563
	8.12	32.4
	8.14	16.2563
	8.16	22.5
	8.18	50.625
	8.2	50.625
	8.22	32.4
	8.24	16.2563
	8.26	27.225
	8.28	50.625
	8.3	32.4
	8.32	50.625
	8.34	38.025
	8.36	38.025
	8.38	32.4
	8.4	22.5
	8.42	22.5
	8.44	22.5
	8.46	27.225
	8.48	16.2563
	8.5	72.9
	8.52	22.5
	8.54	22.5
	8.56	27.225
	8.58	27.225
	8.6	61.2563
	8.62	16.2563
	8.64	44.1
	8.66	44.1
	8.68	27.225
	8.7	32.4
	8.72	16.2563
	8.74	27.225
	8.76	11.025
	8.78	32.4
	8.8	11.025
	8.82	27.225
	8.84	16.2563
	8.86	50.625
	8.88	22.5
	8.9	50.625
	8.92	50.625
	8.94	27.225
	8.96	44.1
	8.98	22.5
	9	38.025
	9.02	27.225
	9.04	27.225
	9.06	27.225
	9.08	32.4
	9.1	32.4
	9.12	32.4
	9.14	44.1
	9.16	38.025
	9.18	38.025
	9.2	38.025
	9.22	50.625
	9.24	57.6
	9.26	27.225
	9.28	22.5
	9.3	27.225
	9.32	50.625
	9.34	38.025
	9.36	27.225
	9.38	38.025
	9.4	11.025
	9.42	27.225
	9.44	44.1
	9.46	68.9062
	9.48	22.5
	9.5	38.025
	9.52	27.225
	9.54	44.1
	9.56	16.2563
	9.58	27.225
	9.6	32.4
	9.62	22.5
	9.64	44.1
	9.66	22.5
	9.68	27.225
	9.7	44.1
	9.72	22.5
	9.74	16.2563
	9.76	32.4
	9.78	57.6
	9.8	44.1
	9.82	22.5
	9.84	27.225
	9.86	44.1
	9.88	38.025
	9.9	27.225
	9.92	32.4
	9.94	27.225
	9.96	27.225
	9.98	22.5
	10	16.2563
	10.02	27.225
	10.04	16.2563
	10.06	11.025
	10.08	44.1
	10.1	27.225
	10.12	16.2563
	10.14	22.5
	10.16	22.5
	10.18	61.2563
	10.2	22.5
	10.22	38.025
	10.24	50.625
	10.26	27.225
	10.28	27.225
	10.3	11.025
	10.32	38.025
	10.34	50.625
	10.36	27.225
	10.38	11.025
	10.4	61.2563
	10.42	22.5
	10.44	44.1
	10.46	32.4
	10.48	16.2563
	10.5	11.025
	10.52	16.2563
	10.54	22.5
	10.56	27.225
	10.58	57.6
	10.6	11.025
	10.62	32.4
	10.64	38.025
	10.66	44.1
	10.68	44.1
	10.7	22.5
	10.72	44.1
	10.74	5.625
	10.76	32.4
	10.78	32.4
	10.8	38.025
	10.82	27.225
	10.84	27.225
	10.86	27.225
	10.88	32.4
	10.9	32.4
	10.92	44.1
	10.94	32.4
	10.96	44.1
	10.98	38.025
	11	38.025
	11.02	32.4
	11.04	50.625
	11.06	27.225
	11.08	32.4
	11.1	16.2563
	11.12	38.025
	11.14	32.4
	11.16	27.225
	11.18	57.6
	11.2	38.025
	11.22	38.025
	11.24	5.625
	11.26	32.4
	11.28	44.1
	11.3	50.625
	11.32	27.225
	11.34	22.5
	11.36	22.5
	11.38	11.025
	11.4	38.025
	11.42	32.4
	11.44	16.2563
	11.46	44.1
	11.48	44.1
	11.5	44.1
	11.52	61.2563
	11.54	50.625
	11.56	22.5
	11.58	44.1
	11.6	50.625
	11.62	32.4
	11.64	11.025
	11.66	44.1
	11.68	27.225
	11.7	50.625
	11.72	50.625
	11.74	38.025
	11.76	50.625
	11.78	27.225
	11.8	16.2563
	11.82	44.1
	11.84	22.5
	11.86	32.4
	11.88	32.4
	11.9	16.2563
	11.92	27.225
	11.94	50.625
	11.96	38.025
	11.98	22.5
	12	32.4
	12.02	32.4
	12.04	50.625
	12.06	57.6
	12.08	38.025
	12.1	57.6
	12.12	32.4
	12.14	16.2563
	12.16	44.1
	12.18	32.4
	12.2	38.025
	12.22	38.025
	12.24	61.2563
	12.26	32.4
	12.28	22.5
	12.3	11.025
	12.32	16.2563
	12.34	11.025
	12.36	57.6
	12.38	32.4
	12.4	32.4
	12.42	32.4
	12.44	27.225
	12.46	22.5
	12.48	38.025
	12.5	11.025
	12.52	50.625
	12.54	32.4
	12.56	72.9
	12.58	38.025
	12.6	16.2563
	12.62	11.025
	12.64	27.225
	12.66	27.225
	12.68	38.025
	12.7	22.5
	12.72	27.225
	12.74	32.4
	12.76	50.625
	12.78	27.225
	12.8	16.2563
	12.82	38.025
	12.84	32.4
	12.86	50.625
	12.88	22.5
	12.9	44.1
	12.92	61.2563
	12.94	22.5
	12.96	27.225
	12.98	38.025
	13	11.025
	13.02	38.025
	13.04	61.2563
	13.06	57.6
	13.08	27.225
	13.1	27.225
	13.12	27.225
	13.14	72.9
	13.16	27.225
	13.18	38.025
	13.2	22.5
	13.22	38.025
	13.24	38.025
	13.26	38.025
	13.28	38.025
	13.3	32.4
	13.32	32.4
	13.34	22.5
	13.36	32.4
	13.38	16.2563
	13.4	44.1
	13.42	44.1
	13.44	16.2563
	13.46	38.025
	13.48	22.5
	13.5	27.225
	13.52	22.5
	13.54	50.625
	13.56	32.4
	13.58	27.225
	13.6	32.4
	13.62	57.6
	13.64	32.4
	13.66	57.6
	13.68	44.1
	13.7	61.2563
	13.72	32.4
	13.74	38.025
	13.76	44.1
	13.78	16.2563
	13.8	61.2563
	13.82	32.4
	13.84	27.225
	13.86	44.1
	13.88	27.225
	13.9	22.5
	13.92	38.025
	13.94	27.225
	13.96	32.4
	13.98	27.225
	14	50.625
	14.02	27.225
	14.04	38.025
	14.06	27.225
	14.08	32.4
	14.1	57.6
	14.12	77.0062
	14.14	44.1
	14.16	50.625
	14.18	72.9
	14.2	44.1
	14.22	38.025
	14.24	68.9062
	14.26	27.225
	14.28	38.025
	14.3	16.2563
	14.32	22.5
	14.34	50.625
	14.36	38.025
	14.38	44.1
	14.4	38.025
	14.42	44.1
	14.44	32.4
	14.46	27.225
	14.48	11.025
	14.5	22.5
	14.52	27.225
	14.54	16.2563
	14.56	57.6
	14.58	44.1
	14.6	68.9062
	14.62	27.225
	14.64	61.2563
	14.66	11.025
	14.68	32.4
	14.7	50.625
	14.72	50.625
	14.74	27.225
	14.76	44.1
	14.78	44.1
	14.8	44.1
	14.82	61.2563
	14.84	50.625
	14.86	11.025
	14.88	44.1
	14.9	32.4
	14.92	44.1
	14.94	68.9062
	14.96	27.225
	14.98	16.2563
	15	44.1
	15.02	50.625
	15.04	32.4
	15.06	27.225
	15.08	50.625
	15.1	27.225
	15.12	27.225
	15.14	32.4
	15.16	27.225
	15.18	38.025
	15.2	32.4
	15.22	32.4
	15.24	61.2563
	15.26	50.625
	15.28	32.4
	15.3	38.025
	15.32	27.225
	15.34	57.6
	15.36	22.5
	15.38	16.2563
	15.4	44.1
	15.42	27.225
	15.44	57.6
	15.46	16.2563
	15.48	44.1
	15.5	68.9062
	15.52	22.5
	15.54	38.025
	15.56	27.225
	15.58	16.2563
	15.6	68.9062
	15.62	38.025
	15.64	32.4
	15.66	72.9
	15.68	32.4
	15.7	72.9
	15.72	50.625
	15.74	32.4
	15.76	50.625
	15.78	22.5
	15.8	50.625
	15.82	22.5
	15.84	38.025
	15.86	57.6
	15.88	32.4
	15.9	57.6
	15.92	44.1
	15.94	38.025
	15.96	44.1
	15.98	32.4
	16	44.1
	16.02	27.225
	16.04	22.5
	16.06	38.025
	16.08	38.025
	16.1	32.4
	16.12	38.025
	16.14	32.4
	16.16	50.625
	16.18	27.225
	16.2	38.025
	16.22	50.625
	16.24	38.025
	16.26	50.625
	16.28	50.625
	16.3	50.625
	16.32	61.2563
	16.34	38.025
	16.36	38.025
	16.38	57.6
	16.4	44.1
	16.42	16.2563
	16.44	38.025
	16.46	61.2563
	16.48	38.025
	16.5	38.025
	16.52	68.9062
	16.54	44.1
	16.56	57.6
	16.58	38.025
	16.6	27.225
	16.62	61.2563
	16.64	32.4
	16.66	27.225
	16.68	32.4
	16.7	27.225
	16.72	50.625
	16.74	32.4
	16.76	38.025
	16.78	61.2563
	16.8	44.1
	16.82	61.2563
	16.84	57.6
	16.86	27.225
	16.88	32.4
	16.9	44.1
	16.92	44.1
	16.94	61.2563
	16.96	27.225
	16.98	32.4
	17	44.1
	17.02	38.025
	17.04	57.6
	17.06	32.4
	17.08	68.9062
	17.1	44.1
	17.12	44.1
	17.14	22.5
	17.16	27.225
	17.18	68.9062
	17.2	50.625
	17.22	57.6
	17.24	38.025
	17.26	38.025
	17.28	50.625
	17.3	44.1
	17.32	50.625
	17.34	50.625
	17.36	27.225
	17.38	94.5562
	17.4	50.625
	17.42	27.225
	17.44	44.1
	17.46	50.625
	17.48	77.0062
	17.5	32.4
	17.52	50.625
	17.54	57.6
	17.56	57.6
	17.58	32.4
	17.6	57.6
	17.62	72.9
	17.64	72.9
	17.66	61.2563
	17.68	32.4
	17.7	50.625
	17.72	32.4
	17.74	38.025
	17.76	32.4
	17.78	57.6
	17.8	50.625
	17.82	72.9
	17.84	72.9
	17.86	61.2563
	17.88	27.225
	17.9	61.2563
	17.92	38.025
	17.94	32.4
	17.96	68.9062
	17.98	44.1
	18	38.025
	18.02	72.9
	18.04	57.6
	18.06	27.225
	18.08	38.025
	18.1	44.1
	18.12	77.0062
	18.14	72.9
	18.16	32.4
	18.18	68.9062
	18.2	22.5
	18.22	68.9062
	18.24	44.1
	18.26	77.0062
	18.28	72.9
	18.3	44.1
	18.32	94.5562
	18.34	38.025
	18.36	50.625
	18.38	50.625
	18.4	68.9062
	18.42	50.625
	18.44	50.625
	18.46	57.6
	18.48	68.9062
	18.5	68.9062
	18.52	72.9
	18.54	68.9062
	18.56	61.2563
	18.58	72.9
	18.6	27.225
	18.62	50.625
	18.64	72.9
	18.66	44.1
	18.68	61.2563
	18.7	61.2563
	18.72	72.9
	18.74	61.2563
	18.76	57.6
	18.78	77.0062
	18.8	85.5563
	18.82	77.0062
	18.84	77.0062
	18.86	50.625
	18.88	38.025
	18.9	38.025
	18.92	108.9
	18.94	77.0062
	18.96	38.025
	18.98	77.0062
	19	90
	19.02	57.6
	19.04	57.6
	19.06	50.625
	19.08	68.9062
	19.1	27.225
	19.12	72.9
	19.14	44.1
	19.16	68.9062
	19.18	108.9
	19.2	61.2563
	19.22	50.625
	19.24	94.5562
	19.26	44.1
	19.28	61.2563
	19.3	61.2563
	19.32	32.4
	19.34	72.9
	19.36	72.9
	19.38	77.0062
	19.4	57.6
	19.42	68.9062
	19.44	72.9
	19.46	38.025
	19.48	61.2563
	19.5	57.6
	19.52	68.9062
	19.54	68.9062
	19.56	38.025
	19.58	57.6
	19.6	72.9
	19.62	38.025
	19.64	44.1
	19.66	85.5563
	19.68	68.9062
	19.7	57.6
	19.72	38.025
	19.74	50.625
	19.76	22.5
	19.78	68.9062
	19.8	77.0062
	19.82	50.625
	19.84	50.625
	19.86	99.225
	19.88	68.9062
	19.9	57.6
	19.92	50.625
	19.94	85.5563
	19.96	57.6
	19.98	61.2563
	20	27.225
	20.02	72.9
	20.04	57.6
	20.06	77.0062
	20.08	77.0062
	20.1	85.5563
	20.12	68.9062
	20.14	50.625
	20.16	57.6
	20.18	85.5563
	20.2	85.5563
	20.22	108.9
	20.24	90
	20.26	57.6
	20.28	57.6
	20.3	50.625
	20.32	57.6
	20.34	72.9
	20.36	77.0062
	20.38	99.225
	20.4	77.0062
	20.42	85.5563
	20.44	32.4
	20.46	113.906
	20.48	85.5563
	20.5	38.025
	20.52	32.4
	20.54	68.9062
	20.56	57.6
	20.58	72.9
	20.6	61.2563
	20.62	72.9
	20.64	72.9
	20.66	85.5563
	20.68	77.0062
	20.7	68.9062
	20.72	119.025
	20.74	22.5
	20.76	57.6
	20.78	90
	20.8	99.225
	20.82	38.025
	20.84	108.9
	20.86	57.6
	20.88	85.5563
	20.9	99.225
	20.92	61.2563
	20.94	57.6
	20.96	68.9062
	20.98	61.2563
	21	90
	21.02	77.0062
	21.04	72.9
	21.06	99.225
	21.08	68.9062
	21.1	72.9
	21.12	90
	21.14	68.9062
	21.16	85.5563
	21.18	57.6
	21.2	124.256
	21.22	94.5562
	21.24	119.025
	21.26	57.6
	21.28	50.625
	21.3	94.5562
	21.32	94.5562
	21.34	61.2563
	21.36	72.9
	21.38	57.6
	21.4	50.625
	21.42	50.625
	21.44	50.625
	21.46	38.025
	21.48	77.0062
	21.5	61.2563
	21.52	108.9
	21.54	94.5562
	21.56	90
	21.58	90
	21.6	85.5563
	21.62	61.2563
	21.64	90
	21.66	77.0062
	21.68	68.9062
	21.7	94.5562
	21.72	38.025
	21.74	113.906
	21.76	72.9
	21.78	50.625
	21.8	57.6
	21.82	68.9062
	21.84	99.225
	21.86	119.025
	21.88	50.625
	21.9	119.025
	21.92	90
	21.94	94.5562
	21.96	77.0062
	21.98	72.9
	22	57.6
	22.02	94.5562
	22.04	119.025
	22.06	38.025
	22.08	77.0062
	22.1	72.9
	22.12	119.025
	22.14	77.0062
	22.16	57.6
	22.18	113.906
	22.2	94.5562
	22.22	77.0062
	22.24	85.5563
	22.26	135.056
	22.28	119.025
	22.3	119.025
	22.32	124.256
	22.34	113.906
	22.36	94.5562
	22.38	94.5562
	22.4	119.025
	22.42	90
	22.44	90
	22.46	140.625
	22.48	108.9
	22.5	119.025
	22.52	90
	22.54	38.025
	22.56	113.906
	22.58	140.625
	22.6	113.906
	22.62	61.2563
	22.64	85.5563
	22.66	72.9
	22.68	68.9062
	22.7	90
	22.72	99.225
	22.74	129.6
	22.76	164.025
	22.78	113.906
	22.8	85.5563
	22.82	90
	22.84	77.0062
	22.86	68.9062
	22.88	85.5563
	22.9	124.256
	22.92	90
	22.94	68.9062
	22.96	108.9
	22.98	113.906
	23	50.625
	23.02	119.025
	23.04	108.9
	23.06	119.025
	23.08	108.9
	23.1	85.5563
	23.12	124.256
	23.14	72.9
	23.16	94.5562
	23.18	77.0062
	23.2	152.1
	23.22	152.1
	23.24	124.256
	23.26	135.056
	23.28	85.5563
	23.3	140.625
	23.32	85.5563
	23.34	124.256
	23.36	108.9
	23.38	129.6
	23.4	94.5562
	23.42	94.5562
	23.44	113.906
	23.46	90
	23.48	129.6
	23.5	146.306
	23.52	94.5562
	23.54	108.9
	23.56	99.225
	23.58	94.5562
	23.6	57.6
	23.62	124.256
	23.64	108.9
	23.66	124.256
	23.68	90
	23.7	94.5562
	23.72	108.9
	23.74	113.906
	23.76	90
	23.78	140.625
	23.8	99.225
	23.82	119.025
	23.84	85.5563
	23.86	113.906
	23.88	164.025
	23.9	113.906
	23.92	129.6
	23.94	124.256
	23.96	119.025
	23.98	113.906
	24	94.5562
	24.02	94.5562
	24.04	72.9
	24.06	119.025
	24.08	119.025
	24.1	108.9
	24.12	85.5563
	24.14	124.256
	24.16	90
	24.18	129.6
	24.2	119.025
	24.22	129.6
	24.24	119.025
	24.26	129.6
	24.28	119.025
	24.3	113.906
	24.32	124.256
	24.34	119.025
	24.36	113.906
	24.38	77.0062
	24.4	113.906
	24.42	94.5562
	24.44	119.025
	24.46	38.025
	24.48	119.025
	24.5	68.9062
	24.52	108.9
	24.54	135.056
	24.56	85.5563
	24.58	94.5562
	24.6	57.6
	24.62	129.6
	24.64	135.056
	24.66	94.5562
	24.68	124.256
	24.7	108.9
	24.72	113.906
	24.74	135.056
	24.76	85.5563
	24.78	94.5562
	24.8	61.2563
	24.82	77.0062
	24.84	113.906
	24.86	113.906
	24.88	68.9062
	24.9	164.025
	24.92	94.5562
	24.94	77.0062
	24.96	85.5563
	24.98	124.256
	25	124.256
	25.02	113.906
	25.04	124.256
	25.06	129.6
	25.08	113.906
	25.1	85.5563
	25.12	152.1
	25.14	152.1
	25.16	85.5563
	25.18	124.256
	25.2	85.5563
	25.22	57.6
	25.24	129.6
	25.26	94.5562
	25.28	85.5563
	25.3	61.2563
	25.32	124.256
	25.34	72.9
	25.36	90
	25.38	129.6
	25.4	119.025
	25.42	68.9062
	25.44	94.5562
	25.46	85.5563
	25.48	119.025
	25.5	85.5563
	25.52	90
	25.54	90
	25.56	99.225
	25.58	68.9062
	25.6	90
	25.62	108.9
	25.64	119.025
	25.66	94.5562
	25.68	135.056
	25.7	94.5562
	25.72	152.1
	25.74	94.5562
	25.76	113.906
	25.78	124.256
	25.8	108.9
	25.82	140.625
	25.84	119.025
	25.86	99.225
	25.88	99.225
	25.9	77.0062
	25.92	113.906
	25.94	57.6
	25.96	90
	25.98	146.306
	26	129.6
	26.02	119.025
	26.04	108.9
	26.06	170.156
	26.08	90
	26.1	119.025
	26.12	99.225
	26.14	152.1
	26.16	94.5562
	26.18	108.9
	26.2	113.906
	26.22	129.6
	26.24	124.256
	26.26	113.906
	26.28	99.225
	26.3	129.6
	26.32	113.906
	26.34	77.0062
	26.36	129.6
	26.38	108.9
	26.4	124.256
	26.42	90
	26.44	90
	26.46	94.5562
	26.48	129.6
	26.5	85.5563
	26.52	119.025
	26.54	124.256
	26.56	113.906
	26.58	129.6
	26.6	85.5563
	26.62	140.625
	26.64	140.625
	26.66	108.9
	26.68	124.256
	26.7	124.256
	26.72	85.5563
	26.74	90
	26.76	113.906
	26.78	158.006
	26.8	99.225
	26.82	77.0062
	26.84	124.256
	26.86	129.6
	26.88	119.025
	26.9	119.025
	26.92	72.9
	26.94	94.5562
	26.96	77.0062
	26.98	77.0062
	27	72.9
	27.02	94.5562
	27.04	85.5563
	27.06	85.5563
	27.08	90
	27.1	72.9
	27.12	99.225
	27.14	94.5562
	27.16	124.256
	27.18	90
	27.2	77.0062
	27.22	94.5562
	27.24	68.9062
	27.26	99.225
	27.28	119.025
	27.3	68.9062
	27.32	94.5562
	27.34	77.0062
	27.36	108.9
	27.38	113.906
	27.4	140.625
	27.42	38.025
	27.44	61.2563
	27.46	90
	27.48	90
	27.5	94.5562
	27.52	135.056
	27.54	94.5562
	27.56	77.0062
	27.58	38.025
	27.6	90
	27.62	61.2563
	27.64	68.9062
	27.66	113.906
	27.68	50.625
	27.7	90
	27.72	99.225
	27.74	129.6
	27.76	72.9
	27.78	108.9
	27.8	50.625
	27.82	94.5562
	27.84	90
	27.86	108.9
	27.88	108.9
	27.9	57.6
	27.92	77.0062
	27.94	85.5563
	27.96	108.9
	27.98	68.9062
	28	32.4
	28.02	113.906
	28.04	99.225
	28.06	99.225
	28.08	77.0062
	28.1	85.5563
	28.12	85.5563
	28.14	44.1
	28.16	50.625
	28.18	77.0062
	28.2	90
	28.22	90
	28.24	68.9062
	28.26	72.9
	28.28	72.9
	28.3	72.9
	28.32	77.0062
	28.34	90
	28.36	72.9
	28.38	57.6
	28.4	77.0062
	28.42	77.0062
	28.44	72.9
	28.46	61.2563
	28.48	94.5562
	28.5	99.225
	28.52	61.2563
	28.54	90
	28.56	108.9
	28.58	108.9
	28.6	124.256
	28.62	119.025
	28.64	113.906
	28.66	72.9
	28.68	90
	28.7	90
	28.72	68.9062
	28.74	77.0062
	28.76	90
	28.78	124.256
	28.8	50.625
	28.82	94.5562
	28.84	129.6
	28.86	94.5562
	28.88	68.9062
	28.9	72.9
	28.92	90
	28.94	50.625
	28.96	57.6
	28.98	108.9
	29	57.6
	29.02	85.5563
	29.04	68.9062
	29.06	50.625
	29.08	90
	29.1	85.5563
	29.12	99.225
	29.14	50.625
	29.16	61.2563
	29.18	68.9062
	29.2	94.5562
	29.22	77.0062
	29.24	85.5563
	29.26	68.9062
	29.28	135.056
	29.3	85.5563
	29.32	77.0062
	29.34	99.225
	29.36	72.9
	29.38	140.625
	29.4	94.5562
	29.42	152.1
	29.44	99.225
	29.46	72.9
	29.48	119.025
	29.5	108.9
	29.52	99.225
	29.54	108.9
	29.56	129.6
	29.58	99.225
	29.6	119.025
	29.62	108.9
	29.64	85.5563
	29.66	113.906
	29.68	119.025
	29.7	72.9
	29.72	119.025
	29.74	94.5562
	29.76	90
	29.78	90
	29.8	94.5562
	29.82	94.5562
	29.84	99.225
	29.86	152.1
	29.88	90
	29.9	94.5562
	29.92	146.306
	29.94	124.256
	29.96	129.6
	29.98	94.5562
	30	119.025
	30.02	195.806
	30.04	124.256
	30.06	170.156
	30.08	113.906
	30.1	152.1
	30.12	158.006
	30.14	124.256
	30.16	113.906
	30.18	85.5563
	30.2	146.306
	30.22	170.156
	30.24	164.025
	30.26	119.025
	30.28	195.806
	30.3	158.006
	30.32	182.756
	30.34	61.2563
	30.36	129.6
	30.38	129.6
	30.4	182.756
	30.42	85.5563
	30.44	182.756
	30.46	124.256
	30.48	182.756
	30.5	152.1
	30.52	129.6
	30.54	119.025
	30.56	164.025
	30.58	113.906
	30.6	94.5562
	30.62	119.025
	30.64	94.5562
	30.66	94.5562
	30.68	119.025
	30.7	99.225
	30.72	140.625
	30.74	90
	30.76	129.6
	30.78	119.025
	30.8	129.6
	30.82	94.5562
	30.84	85.5563
	30.86	124.256
	30.88	94.5562
	30.9	90
	30.92	90
	30.94	135.056
	30.96	113.906
	30.98	140.625
	31	119.025
	31.02	68.9062
	31.04	99.225
	31.06	140.625
	31.08	99.225
	31.1	113.906
	31.12	57.6
	31.14	85.5563
	31.16	108.9
	31.18	85.5563
	31.2	85.5563
	31.22	90
	31.24	94.5562
	31.26	108.9
	31.28	119.025
	31.3	85.5563
	31.32	94.5562
	31.34	99.225
	31.36	38.025
	31.38	108.9
	31.4	113.906
	31.42	85.5563
	31.44	124.256
	31.46	77.0062
	31.48	94.5562
	31.5	85.5563
	31.52	50.625
	31.54	77.0062
	31.56	124.256
	31.58	113.906
	31.6	85.5563
	31.62	61.2563
	31.64	72.9
	31.66	90
	31.68	119.025
	31.7	119.025
	31.72	90
	31.74	94.5562
	31.76	57.6
	31.78	90
	31.8	119.025
	31.82	124.256
	31.84	119.025
	31.86	90
	31.88	68.9062
	31.9	85.5563
	31.92	85.5563
	31.94	124.256
	31.96	61.2563
	31.98	77.0062
	32	146.306
	32.02	90
	32.04	32.4
	32.06	99.225
	32.08	68.9062
	32.1	85.5563
	32.12	99.225
	32.14	77.0062
	32.16	94.5562
	32.18	44.1
	32.2	77.0062
	32.22	77.0062
	32.24	72.9
	32.26	113.906
	32.28	77.0062
	32.3	94.5562
	32.32	99.225
	32.34	72.9
	32.36	90
	32.38	72.9
	32.4	61.2563
	32.42	77.0062
	32.44	113.906
	32.46	113.906
	32.48	72.9
	32.5	72.9
	32.52	90
	32.54	68.9062
	32.56	72.9
	32.58	94.5562
	32.6	85.5563
	32.62	90
	32.64	90
	32.66	61.2563
	32.68	94.5562
	32.7	108.9
	32.72	94.5562
	32.74	99.225
	32.76	77.0062
	32.78	90
	32.8	50.625
	32.82	90
	32.84	119.025
	32.86	119.025
	32.88	68.9062
	32.9	77.0062
	32.92	90
	32.94	77.0062
	32.96	99.225
	32.98	129.6
	33	90
	33.02	77.0062
	33.04	94.5562
	33.06	72.9
	33.08	90
	33.1	94.5562
	33.12	94.5562
	33.14	119.025
	33.16	94.5562
	33.18	129.6
	33.2	146.306
	33.22	119.025
	33.24	90
	33.26	119.025
	33.28	72.9
	33.3	57.6
	33.32	108.9
	33.34	90
	33.36	94.5562
	33.38	108.9
	33.4	77.0062
	33.42	113.906
	33.44	90
	33.46	61.2563
	33.48	135.056
	33.5	85.5563
	33.52	85.5563
	33.54	108.9
	33.56	61.2563
	33.58	152.1
	33.6	108.9
	33.62	119.025
	33.64	108.9
	33.66	85.5563
	33.68	113.906
	33.7	119.025
	33.72	113.906
	33.74	38.025
	33.76	99.225
	33.78	129.6
	33.8	94.5562
	33.82	124.256
	33.84	113.906
	33.86	99.225
	33.88	135.056
	33.9	77.0062
	33.92	135.056
	33.94	113.906
	33.96	99.225
	33.98	129.6
	34	108.9
	34.02	119.025
	34.04	152.1
	34.06	85.5563
	34.08	124.256
	34.1	99.225
	34.12	77.0062
	34.14	94.5562
	34.16	152.1
	34.18	135.056
	34.2	152.1
	34.22	119.025
	34.24	152.1
	34.26	85.5563
	34.28	146.306
	34.3	94.5562
	34.32	99.225
	34.34	164.025
	34.36	129.6
	34.38	94.5562
	34.4	113.906
	34.42	170.156
	34.44	77.0062
	34.46	158.006
	34.48	152.1
	34.5	61.2563
	34.52	158.006
	34.54	158.006
	34.56	129.6
	34.58	182.756
	34.6	94.5562
	34.62	99.225
	34.64	135.056
	34.66	170.156
	34.68	164.025
	34.7	152.1
	34.72	202.5
	34.74	202.5
	34.76	158.006
	34.78	189.225
	34.8	202.5
	34.82	182.756
	34.84	146.306
	34.86	140.625
	34.88	182.756
	34.9	189.225
	34.92	216.225
	34.94	158.006
	34.96	216.225
	34.98	216.225
	35	182.756
	35.02	245.025
	35.04	237.656
	35.06	216.225
	35.08	283.556
	35.1	230.4
	35.12	202.5
	35.14	216.225
	35.16	237.656
	35.18	369.056
	35.2	216.225
	35.22	308.025
	35.24	283.556
	35.26	260.1
	35.28	275.625
	35.3	316.406
	35.32	245.025
	35.34	324.9
	35.36	351.056
	35.38	308.025
	35.4	283.556
	35.42	283.556
	35.44	378.225
	35.46	299.756
	35.48	378.225
	35.5	360
	35.52	252.506
	35.54	360
	35.56	299.756
	35.58	435.6
	35.6	308.025
	35.62	425.756
	35.64	387.506
	35.66	425.756
	35.68	416.025
	35.7	308.025
	35.72	369.056
	35.74	445.556
	35.76	378.225
	35.78	378.225
	35.8	455.625
	35.82	369.056
	35.84	267.806
	35.86	387.506
	35.88	260.1
	35.9	387.506
	35.92	283.556
	35.94	299.756
	35.96	351.056
	35.98	342.225
	36	316.406
	36.02	260.1
	36.04	333.506
	36.06	308.025
	36.08	299.756
	36.1	245.025
	36.12	283.556
	36.14	378.225
	36.16	324.9
	36.18	209.306
	36.2	283.556
	36.22	230.4
	36.24	291.6
	36.26	291.6
	36.28	267.806
	36.3	230.4
	36.32	195.806
	36.34	267.806
	36.36	182.756
	36.38	245.025
	36.4	216.225
	36.42	182.756
	36.44	275.625
	36.46	245.025
	36.48	176.4
	36.5	182.756
	36.52	152.1
	36.54	189.225
	36.56	152.1
	36.58	140.625
	36.6	189.225
	36.62	164.025
	36.64	170.156
	36.66	152.1
	36.68	129.6
	36.7	170.156
	36.72	158.006
	36.74	152.1
	36.76	164.025
	36.78	140.625
	36.8	182.756
	36.82	152.1
	36.84	108.9
	36.86	146.306
	36.88	176.4
	36.9	152.1
	36.92	152.1
	36.94	129.6
	36.96	108.9
	36.98	119.025
	37	135.056
	37.02	152.1
	37.04	108.9
	37.06	140.625
	37.08	146.306
	37.1	164.025
	37.12	119.025
	37.14	135.056
	37.16	135.056
	37.18	94.5562
	37.2	158.006
	37.22	99.225
	37.24	61.2563
	37.26	90
	37.28	94.5562
	37.3	124.256
	37.32	85.5563
	37.34	90
	37.36	113.906
	37.38	124.256
	37.4	90
	37.42	129.6
	37.44	119.025
	37.46	90
	37.48	135.056
	37.5	90
	37.52	152.1
	37.54	68.9062
	37.56	129.6
	37.58	94.5562
	37.6	90
	37.62	72.9
	37.64	85.5563
	37.66	85.5563
	37.68	94.5562
	37.7	72.9
	37.72	85.5563
	37.74	61.2563
	37.76	50.625
	37.78	85.5563
	37.8	72.9
	37.82	94.5562
	37.84	61.2563
	37.86	94.5562
	37.88	77.0062
	37.9	72.9
	37.92	94.5562
	37.94	113.906
	37.96	85.5563
	37.98	90
	38	77.0062
	38.02	50.625
	38.04	44.1
	38.06	57.6
	38.08	61.2563
	38.1	44.1
	38.12	85.5563
	38.14	90
	38.16	85.5563
	38.18	68.9062
	38.2	77.0062
	38.22	90
	38.24	61.2563
	38.26	50.625
	38.28	77.0062
	38.3	99.225
	38.32	72.9
	38.34	32.4
	38.36	85.5563
	38.38	50.625
	38.4	68.9062
	38.42	68.9062
	38.44	50.625
	38.46	90
	38.48	50.625
	38.5	72.9
	38.52	94.5562
	38.54	44.1
	38.56	57.6
	38.58	61.2563
	38.6	90
	38.62	27.225
	38.64	108.9
	38.66	50.625
	38.68	90
	38.7	99.225
	38.72	57.6
	38.74	57.6
	38.76	27.225
	38.78	90
	38.8	50.625
	38.82	99.225
	38.84	90
	38.86	72.9
	38.88	57.6
	38.9	50.625
	38.92	94.5562
	38.94	77.0062
	38.96	77.0062
	38.98	22.5
	39	72.9
	39.02	68.9062
	39.04	38.025
	39.06	68.9062
	39.08	44.1
	39.1	90
	39.12	94.5562
	39.14	94.5562
	39.16	68.9062
	39.18	68.9062
	39.2	61.2563
	39.22	72.9
	39.24	44.1
	39.26	50.625
	39.28	85.5563
	39.3	68.9062
	39.32	94.5562
	39.34	57.6
	39.36	57.6
	39.38	72.9
	39.4	27.225
	39.42	32.4
	39.44	72.9
	39.46	50.625
	39.48	77.0062
	39.5	68.9062
	39.52	61.2563
	39.54	44.1
	39.56	85.5563
	39.58	61.2563
	39.6	68.9062
	39.62	85.5563
	39.64	61.2563
	39.66	27.225
	39.68	68.9062
	39.7	68.9062
	39.72	44.1
	39.74	44.1
	39.76	90
	39.78	38.025
	39.8	72.9
	39.82	61.2563
	39.84	50.625
	39.86	94.5562
	39.88	85.5563
	39.9	72.9
	39.92	85.5563
	39.94	113.906
	39.96	94.5562
	39.98	90
	40	50.625
	40.02	68.9062
	40.04	38.025
	40.06	68.9062
	40.08	72.9
	40.1	61.2563
	40.12	50.625
	40.14	72.9
	40.16	72.9
	40.18	61.2563
	40.2	44.1
	40.22	90
	40.24	68.9062
	40.26	57.6
	40.28	72.9
	40.3	57.6
	40.32	38.025
	40.34	90
	40.36	61.2563
	40.38	85.5563
	40.4	61.2563
	40.42	77.0062
	40.44	57.6
	40.46	77.0062
	40.48	61.2563
	40.5	94.5562
	40.52	94.5562
	40.54	50.625
	40.56	90
	40.58	72.9
	40.6	61.2563
	40.62	38.025
	40.64	68.9062
	40.66	38.025
	40.68	68.9062
	40.7	77.0062
	40.72	72.9
	40.74	77.0062
	40.76	68.9062
	40.78	68.9062
	40.8	77.0062
	40.82	77.0062
	40.84	72.9
	40.86	61.2563
	40.88	61.2563
	40.9	68.9062
	40.92	72.9
	40.94	77.0062
	40.96	61.2563
	40.98	61.2563
	41	94.5562
	41.02	124.256
	41.04	77.0062
	41.06	61.2563
	41.08	50.625
	41.1	44.1
	41.12	68.9062
	41.14	61.2563
	41.16	68.9062
	41.18	38.025
	41.2	50.625
	41.22	50.625
	41.24	68.9062
	41.26	57.6
	41.28	50.625
	41.3	57.6
	41.32	99.225
	41.34	99.225
	41.36	57.6
	41.38	22.5
	41.4	50.625
	41.42	61.2563
	41.44	99.225
	41.46	44.1
	41.48	68.9062
	41.5	72.9
	41.52	99.225
	41.54	38.025
	41.56	72.9
	41.58	61.2563
	41.6	57.6
	41.62	90
	41.64	44.1
	41.66	90
	41.68	77.0062
	41.7	57.6
	41.72	61.2563
	41.74	108.9
	41.76	32.4
	41.78	38.025
	41.8	94.5562
	41.82	57.6
	41.84	61.2563
	41.86	85.5563
	41.88	77.0062
	41.9	61.2563
	41.92	99.225
	41.94	61.2563
	41.96	61.2563
	41.98	90
	42	108.9
	42.02	68.9062
	42.04	119.025
	42.06	50.625
	42.08	57.6
	42.1	72.9
	42.12	61.2563
	42.14	85.5563
	42.16	68.9062
	42.18	50.625
	42.2	57.6
	42.22	68.9062
	42.24	50.625
	42.26	68.9062
	42.28	50.625
	42.3	77.0062
	42.32	77.0062
	42.34	77.0062
	42.36	44.1
	42.38	50.625
	42.4	50.625
	42.42	57.6
	42.44	57.6
	42.46	61.2563
	42.48	99.225
	42.5	77.0062
	42.52	90
	42.54	50.625
	42.56	57.6
	42.58	32.4
	42.6	72.9
	42.62	77.0062
	42.64	68.9062
	42.66	85.5563
	42.68	57.6
	42.7	113.906
	42.72	90
	42.74	68.9062
	42.76	72.9
	42.78	94.5562
	42.8	61.2563
	42.82	85.5563
	42.84	85.5563
	42.86	77.0062
	42.88	113.906
	42.9	72.9
	42.92	85.5563
	42.94	90
	42.96	68.9062
	42.98	90
	43	85.5563
	43.02	113.906
	43.04	94.5562
	43.06	108.9
	43.08	135.056
	43.1	77.0062
	43.12	113.906
	43.14	119.025
	43.16	61.2563
	43.18	119.025
	43.2	94.5562
	43.22	108.9
	43.24	113.906
	43.26	61.2563
	43.28	94.5562
	43.3	44.1
	43.32	90
	43.34	113.906
	43.36	113.906
	43.38	140.625
	43.4	119.025
	43.42	124.256
	43.44	94.5562
	43.46	72.9
	43.48	113.906
	43.5	152.1
	43.52	99.225
	43.54	99.225
	43.56	68.9062
	43.58	61.2563
	43.6	72.9
	43.62	146.306
	43.64	85.5563
	43.66	99.225
	43.68	94.5562
	43.7	108.9
	43.72	94.5562
	43.74	68.9062
	43.76	99.225
	43.78	119.025
	43.8	94.5562
	43.82	99.225
	43.84	90
	43.86	119.025
	43.88	119.025
	43.9	85.5563
	43.92	94.5562
	43.94	85.5563
	43.96	94.5562
	43.98	119.025
	44	90
	44.02	85.5563
	44.04	119.025
	44.06	90
	44.08	72.9
	44.1	99.225
	44.12	90
	44.14	90
	44.16	99.225
	44.18	72.9
	44.2	72.9
	44.22	50.625
	44.24	68.9062
	44.26	94.5562
	44.28	72.9
	44.3	77.0062
	44.32	61.2563
	44.34	50.625
	44.36	108.9
	44.38	90
	44.4	50.625
	44.42	44.1
	44.44	68.9062
	44.46	72.9
	44.48	108.9
	44.5	72.9
	44.52	68.9062
	44.54	124.256
	44.56	68.9062
	44.58	85.5563
	44.6	50.625
	44.62	32.4
	44.64	72.9
	44.66	72.9
	44.68	72.9
	44.7	57.6
	44.72	72.9
	44.74	72.9
	44.76	27.225
	44.78	94.5562
	44.8	50.625
	44.82	94.5562
	44.84	68.9062
	44.86	77.0062
	44.88	72.9
	44.9	68.9062
	44.92	72.9
	44.94	94.5562
	44.96	68.9062
	44.98	50.625
[truncated: 2,751 more rows]

## Sheet: TGAnano
	2.04428	99.4632
	3.06917	99.4635
	4.09407	99.4639
	5.11896	99.4643
	6.14386	99.4647
	7.16875	99.4651
	8.19364	99.4655
	10.2434	99.4663
	9.21854	99.4659
	11.2683	99.4667
	12.2932	99.4671
	14.343	99.4679
	15.3679	99.4683
	13.3181	99.4675
	16.3928	99.4687
	18.4426	99.4694
	17.4177	99.4691
	19.4675	99.4698
	20.4924	99.4702
	22.5422	99.471
	21.5173	99.4706
	23.5671	99.4714
	24.592	99.4718
	25.6168	99.4722
	26.6417	99.4726
	27.6666	99.473
	28.6915	99.4734
	29.7164	99.4738
	30.7413	99.4742
	31.7662	99.4746
	32.7911	99.475
	34.8409	99.4757
	33.816	99.4754
	35.8658	99.4761
	36.8907	99.4765
	38.9405	99.4773
	37.9156	99.4769
	39.9654	99.4777
	40.9903	99.4781
	42.0152	99.4785
	43.04	99.4789
	45.0898	99.4797
	44.0649	99.4793
	47.1396	99.4805
	46.1147	99.4801
	48.1645	99.4809
	49.1894	99.4813
	50.2143	99.4816
	51.2392	99.482
	52.2641	99.4824
	53.289	99.4828
	54.3139	99.4832
	55.3388	99.4836
	56.3637	99.484
	58.4135	99.4848
	57.3886	99.4844
	59.4384	99.4852
	60.4632	99.4856
	62.513	99.4864
	61.4881	99.486
	63.5379	99.4868
	65.5877	99.4876
	64.5628	99.4872
	66.6126	99.4879
	68.6624	99.4887
	67.6375	99.4883
	69.6873	99.4891
	70.7122	99.4895
	71.7371	99.4899
	72.762	99.4903
	73.7869	99.4907
	75.8367	99.4915
	74.8118	99.4911
	76.8616	99.4919
	78.9113	99.4927
	77.8865	99.4923
	79.9362	99.4931
	80.9584	99.2246
	81.9833	99.225
	83.0082	99.2254
	84.0331	99.2258
	86.0828	99.2266
	85.058	99.2262
	87.1077	99.227
	88.1326	99.2274
	89.1575	99.2278
	90.1824	99.2282
	91.2073	99.2286
	92.2322	99.229
	93.2571	99.2294
	94.282	99.2298
	95.3069	99.2301
	96.3318	99.2305
	97.3567	99.2309
	99.4065	99.2317
	98.3816	99.2313
	100.431	99.2321
	101.456	99.2325
	102.481	99.2329
	103.506	99.2333
	104.531	99.2337
	105.556	99.2341
	106.581	99.2345
	107.606	99.2349
	109.655	99.2357
	108.631	99.2353
	110.68	99.2361
	111.705	99.2364
	112.73	99.2368
	113.755	99.2372
	114.78	99.2376
	115.805	99.238
	116.83	99.2384
	117.855	99.2388
	118.879	99.2392
	119.904	99.2396
	120.926	98.9712
	121.951	98.9716
	122.976	98.972
	124.001	98.9724
	125.026	98.9727
	126.051	98.9731
	127.076	98.9735
	128.101	98.9739
	129.126	98.9743
	130.151	98.9747
	131.175	98.9751
	132.2	98.9755
	133.225	98.9759
	135.275	98.9767
	134.25	98.9763
	136.3	98.9771
	137.322	98.7086
	138.347	98.709
	139.372	98.7094
	140.397	98.7098
	141.422	98.7102
	142.447	98.7106
	143.471	98.711
	144.496	98.7114
	145.521	98.7118
	146.546	98.7122
	147.571	98.7126
	149.621	98.7134
	148.596	98.713
	150.646	98.7138
	151.671	98.7142
	152.695	98.7146
	153.72	98.7149
	154.742	98.4465
	155.767	98.4469
	156.792	98.4473
	157.817	98.4477
	158.842	98.4481
	159.867	98.4485
	160.892	98.4489
	161.917	98.4493
	163.967	98.4501
	162.942	98.4497
	164.991	98.4505
	166.014	98.182
	167.038	98.1824
	168.063	98.1828
	169.088	98.1832
	170.113	98.1836
	171.138	98.184
	172.163	98.1844
	173.188	98.1848
	174.213	98.1852
	175.238	98.1856
	176.263	98.186
	177.287	98.1864
	178.312	98.1868
	179.337	98.1871
	180.362	98.1875
	181.387	98.1879
	182.412	98.1883
	183.437	98.1887
	184.462	98.1891
	186.511	98.1899
	185.487	98.1895
	187.536	98.1903
	188.558	97.9219
	189.583	97.9223
	190.608	97.9227
	191.633	97.9231
	192.658	97.9234
	193.68	97.655
	194.705	97.6554
	195.73	97.6558
	196.755	97.6562
	197.78	97.6566
	198.805	97.657
	199.83	97.6574
	200.854	97.6578
	201.879	97.6582
	202.904	97.6586
	203.929	97.659
	204.951	97.3905
	205.976	97.3909
	207.001	97.3913
	208.026	97.3917
	209.051	97.3921
	210.076	97.3925
	211.101	97.3929
	212.126	97.3933
	213.15	97.3937
	214.175	97.3941
	215.2	97.3945
	216.222	97.126
	217.247	97.1264
	218.272	97.1268
	219.297	97.1272
	220.322	97.1276
	221.344	96.8592
	223.394	96.86
	222.369	96.8596
	224.419	96.8604
	226.469	96.8612
	227.493	96.8616
	228.516	96.5931
	229.54	96.5935
	231.59	96.5943
	230.565	96.5939
	232.615	96.5947
	234.665	96.5955
	233.64	96.5951
	235.69	96.5959
	236.715	96.5963
	238.765	96.5971
	239.789	96.5975
	240.814	96.5979
	242.861	96.3298
	243.886	96.3302
	244.911	96.3306
	245.933	96.0622
	246.958	96.0626
	247.983	96.063
	250.033	96.0638
	249.008	96.0634
	251.058	96.0642
	252.083	96.0645
	254.132	96.0653
	253.108	96.0649
	255.157	96.0657
	256.179	95.7973
	257.204	95.7977
	258.229	95.7981
	259.251	95.5297
	260.276	95.5301
	261.301	95.5305
	262.326	95.5308
	263.348	95.2624
	264.373	95.2628
	265.398	95.2632
	266.423	95.2636
	267.445	94.9952
	268.47	94.9956
	269.492	94.7271
	270.517	94.7275
	271.539	94.4591
	272.564	94.4595
	273.589	94.4599
	274.611	94.1915
	275.633	93.9231
	276.655	93.6546
	277.677	93.3862
	279.724	93.1182
	280.747	92.8497
	281.772	92.8501
	282.796	92.8505
	283.816	92.3133
	285.863	92.0453
	287.907	91.5084
	289.954	91.2404
	291.998	90.7035
	294.043	90.1667
	296.09	89.8987
	297.109	89.3614
	299.153	88.8246
	301.198	88.2877
	302.22	88.0193
	303.242	87.7509
	304.264	87.4824
	305.286	87.214
	306.306	86.6768
	308.35	86.1399
	309.372	85.8715
	311.416	85.3346
	313.461	84.7978
	314.483	84.5294
	316.527	83.9925
	317.549	83.7241
	319.593	83.1872
	321.638	82.6504
	323.682	82.1135
	324.704	81.8451
	325.729	81.8455
	326.751	81.5771
	327.771	81.0399
	329.818	80.7718
	331.865	80.5038
	333.912	80.2358
	335.959	79.9677
	336.981	79.6993
	338.003	79.4309
	340.053	79.4317
	341.072	78.8944
	343.122	78.8952
	345.172	78.896
	346.194	78.6276
	348.241	78.3595
	349.263	78.0911
	351.31	77.8231
	353.36	77.8239
	354.385	77.8243
	355.407	77.5558
	356.429	77.2874
	357.454	77.2878
	359.504	77.2886
	360.529	77.289
	361.553	77.2894
	363.603	77.2902
	364.628	77.2906
	366.675	77.0225
	367.7	77.0229
	368.725	77.0233
	370.775	77.0241
	371.8	77.0245
	372.825	77.0249
	374.872	76.7569
	375.896	76.7573
	377.946	76.758
	379.996	76.7588
	381.021	76.7592
	383.071	76.76
	382.046	76.7596
	384.096	76.7604
	386.145	76.7612
	387.168	76.4928
	388.192	76.4932
	390.242	76.4939
	391.267	76.4943
	393.317	76.4951
	394.342	76.4955
	396.392	76.4963
	398.441	76.4971
	400.488	76.2291
	401.511	75.9606
	402.535	75.961
	404.585	75.9618
	405.61	75.9622
	403.56	75.9614
	407.66	75.963
	408.685	75.9634
	409.71	75.9638
	410.735	75.9642
	411.76	75.9646
	413.809	75.9654
	415.859	75.9662
	417.909	75.9669
	419.959	75.9677
	420.984	75.9681
	422.008	75.9685
	423.033	75.9689
	424.058	75.9693
	425.083	75.9697
	427.133	75.9705
	429.183	75.9713
	431.233	75.9721
	433.282	75.9728
	435.332	75.9736
	437.382	75.9744
	439.432	75.9752
	441.481	75.976
	443.531	75.9768
	444.556	75.9772
	446.606	75.978
	448.656	75.9787
	450.706	75.9795
	452.755	75.9803
	453.777	75.7119
	455.827	75.7127
	456.852	75.7131
	457.877	75.7135
	459.927	75.7143
	460.952	75.7147
	463.001	75.7154
	464.026	75.7158
	466.076	75.7166
	468.123	75.4486
	469.148	75.449
	471.198	75.4498
	473.248	75.4506
	476.322	75.4517
	478.372	75.4525
	480.422	75.4533
	482.472	75.4541
	483.497	75.4545
	484.521	75.4549
	485.546	75.4553
	486.571	75.4557
	488.621	75.4565
	489.646	75.4569
	491.693	75.1888
	492.718	75.1892
	494.768	75.19
	496.817	75.1908
	498.867	75.1916
	500.917	75.1924
	502.967	75.1932
	505.017	75.1939
	507.066	75.1947
	509.116	75.1955
	511.166	75.1963
	514.241	75.1975
	517.315	75.1987
	519.362	74.9306
	521.412	74.9314
	522.437	74.9318
	524.487	74.9326
	526.537	74.9334
	527.562	74.9338
	529.611	74.9346
	531.661	74.9354
	533.711	74.9361
	535.761	74.9369
	537.81	74.9377
	539.86	74.9385
	541.91	74.9393
	543.96	74.9401
	546.007	74.672
	547.032	74.6724
	548.057	74.6728
	550.106	74.6736
	553.181	74.6748
	554.206	74.6752
	556.256	74.676
	558.306	74.6768
	559.331	74.6772
	561.38	74.6779
	563.43	74.6787
	565.48	74.6795
	568.555	74.6807
	570.604	74.6815
	571.629	74.6819
	573.679	74.6827
	575.729	74.6835
	577.779	74.6842
	579.828	74.685
	581.878	74.6858
	584.953	74.687
	587	74.419
	589.05	74.4198
	590.075	74.4202
	592.124	74.4209
	594.174	74.4217
	596.224	74.4225
	598.274	74.4233
	601.348	74.4245
	603.398	74.4253
	605.448	74.4261
	607.498	74.4268
	609.548	74.4276
	611.597	74.4284
	612.622	74.4288
	613.647	74.4292

## Sheet: FT-IRmembrane
	4000	90.0552	3995.69	43.6464
	3995.69	90.0552	3991.39	43.6464
	3991.39	90.0552	3987.08	43.6464
	3987.08	90.0552	3978.47	43.6464
	3982.78	90.0552	3974.16	43.6464
	3978.47	90.0552	3969.86	43.6464
	3974.16	90.0552	3982.78	43.6464
	3969.86	90.0552	3965.55	43.6464
	3965.55	90.0552	3961.24	43.6464
	3961.24	90.0552	3956.94	43.6464
	3956.94	90.0552	3952.63	43.6464
	3952.63	90.0552	3948.33	43.6464
	3948.33	90.0552	3944.02	43.6464
	3939.71	90.0552	3939.71	43.6464
	3944.02	90.0552	3935.41	43.6464
	3935.41	90.0552	3931.1	43.6464
	3931.1	90.0552	3926.79	43.6464
	3926.79	90.0552	3922.49	43.6464
	3922.49	90.0552	3918.18	43.6464
	3918.18	90.0552	3913.88	43.6464
	3913.88	90.0552	3909.57	43.6464
	3909.57	90.0552	3905.26	43.6464
	3905.26	90.0552	3900.96	43.6464
	3900.96	90.0552	3896.65	43.6464
	3896.65	90.0552	3892.34	43.6464
	3892.34	90.0552	3888.04	43.6464
	3888.04	90.0552	3883.73	43.6464
	3883.73	90.0552	3879.43	43.6464
	3879.43	90.0552	3875.12	43.6464
	3875.12	90.0552	3870.81	43.6464
	3870.81	90.0552	3866.51	43.6464
	3866.51	90.0552	3862.2	43.6464
	3862.2	90.0552	3857.89	43.6464
	3857.89	90.0552	3853.59	43.6464
	3853.59	90.0552	3849.28	43.6464
	3849.28	90.0552	3844.98	43.6464
	3844.98	90.0552	3840.67	43.6464
	3840.67	90.0552	3836.36	43.6464
	3836.36	90.0552	3832.06	43.6464
	3827.75	90.0552	3827.75	43.6464
	3832.06	90.0552	3823.44	43.6464
	3823.44	90.0552	3819.14	43.6464
	3814.83	90.0552	3814.83	43.6464
	3819.14	90.0552	3810.53	43.6464
	3810.53	90.0552	3806.22	43.6464
	3806.22	90.0552	3801.91	43.6464
	3801.91	90.0552	3797.61	43.6464
	3797.61	90.0552	3789	43.6464
	3793.3	90.0552	3784.69	43.6464
	3789	90.0552	3793.3	43.6464
	3784.69	90.0552	3776.08	43.6464
	3776.08	90.0552	3780.38	43.6464
	3780.38	90.0552	3771.77	43.6464
	3771.77	90.0552	3763.16	43.6464
	3767.46	90.0552	3767.46	43.6464
	3763.16	90.0552	3758.85	43.6464
	3758.85	90.0552	3750.24	43.6464
	3750.24	90.0552	3741.63	43.6464
	3754.55	90.0552	3733.01	43.6464
	3745.93	90.0552	3724.4	43.6464
	3741.63	90.0552	3745.93	43.6464
	3737.32	90.0552	3754.55	43.6464
	3733.01	90.0552	3737.32	43.6464
	3728.71	90.0552	3728.71	43.6464
	3724.4	90.0552	3720.1	43.6464
	3720.1	90.0552	3711.48	43.6464
	3715.79	90.0552	3715.79	43.6464
	3711.48	90.0552	3707.18	43.6464
	3707.18	90.0552	3702.87	43.6464
	3707.18	89.8711	3698.56	43.6464
	3702.87	89.8711	3694.26	43.6464
	3698.56	89.8711	3689.95	43.6464
	3694.26	89.8711	3681.34	43.4622
	3689.95	89.8711	3677.03	43.4622
	3685.65	89.8711	3672.73	43.4622
	3681.34	89.8711	3668.42	43.4622
	3677.03	89.8711	3664.11	43.4622
	3668.42	89.8711	3655.5	43.4622
	3672.73	89.8711	3651.2	43.4622
	3664.11	89.8711	3646.89	43.2781
	3659.81	89.8711	3642.58	43.2781
	3659.81	89.6869	3633.97	43.2781
	3655.5	89.6869	3629.67	43.2781
	3651.2	89.6869	3621.05	43.2781
	3646.89	89.6869	3616.75	43.0939
	3642.58	89.6869	3612.44	43.0939
	3638.28	89.6869	3608.13	43.0939
	3633.97	89.6869	3603.83	43.0939
	3629.67	89.6869	3599.52	43.0939
	3625.36	89.6869	3595.22	43.0939
	3616.75	89.6869	3590.91	43.0939
	3621.05	89.6869	3586.6	42.9098
	3612.44	89.6869	3582.3	42.9098
	3608.13	89.6869	3577.99	42.9098
	3603.83	89.6869	3573.68	42.9098
	3599.52	89.6869	3569.38	42.9098
	3595.22	89.6869	3565.07	42.7256
	3590.91	89.6869	3560.77	42.7256
	3586.6	89.6869	3556.46	42.7256
	3582.3	89.6869	3552.15	42.7256
	3573.68	89.6869	3547.85	42.5414
	3569.38	89.6869	3543.54	42.5414
	3565.07	89.5028	3539.23	42.5414
	3560.77	89.5028	3534.93	42.5414
	3556.46	89.5028	3530.62	42.3573
	3552.15	89.5028	3526.32	42.3573
	3547.85	89.5028	3522.01	42.3573
	3543.54	89.5028	3517.7	42.3573
	3539.23	89.3186	3513.4	42.1731
	3534.93	89.3186	3509.09	42.1731
	3530.62	89.3186	3504.78	42.1731
	3526.32	89.3186	3500.48	42.1731
	3522.01	89.5028	3496.17	41.989
	3517.7	89.5028	3491.87	41.989
	3513.4	89.5028	3487.56	41.989
	3509.09	89.5028	3483.25	41.989
	3504.78	89.5028	3474.64	41.989
	3496.17	89.6869	3478.95	41.989
	3491.87	89.8711	3470.33	41.989
	3487.56	89.8711	3466.03	41.989
	3483.25	89.8711	3461.72	41.989
	3478.95	89.8711	3457.42	41.989
	3474.64	89.8711	3453.11	42.1731
	3470.33	89.6869	3448.8	42.3573
	3466.03	89.5028	3444.5	42.3573
	3461.72	89.3186	3440.19	42.3573
	3457.42	89.3186	3435.89	42.3573
	3457.42	89.1344	3431.58	42.3573
	3453.11	88.9503	3427.27	42.3573
	3448.8	88.9503	3422.97	42.1731
	3448.8	88.7661	3418.66	41.989
	3444.5	88.7661	3414.35	41.8048
	3444.5	88.582	3410.05	41.4365
	3444.5	88.3978	3405.74	41.0681
	3444.5	88.2136	3401.44	40.884
	3440.19	88.2136	3397.13	40.6998
	3435.89	88.0295	3392.82	40.5157
	3431.58	88.0295	3388.52	40.3315
	3431.58	88.2136	3384.21	40.3315
	3431.58	88.3978	3379.9	40.3315
	3427.27	88.7661	3375.6	40.5157
	3422.97	88.9503	3371.29	40.6998
	3418.66	88.9503	3366.99	40.884
	3414.35	88.9503	3362.68	40.884
	3410.05	88.9503	3358.37	40.884
	3405.74	88.9503	3354.07	40.884
	3401.44	88.9503	3349.76	40.884
	3397.13	88.9503	3341.15	40.884
	3392.82	89.1344	3336.84	41.0681
	3388.52	89.1344	3332.54	41.2523
	3384.21	89.1344	3328.23	41.4365
	3379.9	89.1344	3323.92	41.6206
	3375.6	89.1344	3319.62	41.8048
	3371.29	89.3186	3315.31	41.8048
	3362.68	89.3186	3306.7	41.8048
	3366.99	89.3186	3298.09	41.8048
	3358.37	89.3186	3293.78	41.8048
	3354.07	89.3186	3289.47	41.8048
	3349.76	89.3186	3280.86	41.989
	3345.45	89.1344	3272.25	42.1731
	3341.15	89.1344	3263.64	42.3573
	3336.84	89.1344	3255.02	42.5414
	3332.54	89.3186	3242.11	42.5414
	3328.23	89.5028	3237.8	42.7256
	3323.92	89.5028	3233.49	42.7256
	3319.62	89.5028	3224.88	42.7256
	3315.31	89.5028	3220.57	42.7256
	3311	89.5028	3216.27	42.7256
	3306.7	89.3186	3207.66	42.7256
	3298.09	89.3186	3203.35	42.7256
	3302.39	89.3186	3194.74	42.7256
	3293.78	89.3186	3190.43	42.7256
	3289.47	89.3186	3186.12	42.7256
	3285.17	89.3186	3181.82	42.7256
	3280.86	89.3186	3177.51	42.7256
	3276.56	89.1344	3173.21	42.7256
	3272.25	89.1344	3168.9	42.7256
	3267.94	89.1344	3164.59	42.7256
	3263.64	89.1344	3160.29	42.7256
	3259.33	89.1344	3155.98	42.7256
	3255.02	89.1344	3151.67	42.7256
	3246.41	89.1344	3147.37	42.7256
	3250.72	89.1344	3138.76	42.7256
	3237.8	89.1344	3130.14	42.7256
	3242.11	89.1344	3121.53	42.7256
	3233.49	89.1344	3117.22	42.7256
	3229.19	89.1344	3112.92	42.7256
	3224.88	89.1344	3108.61	42.7256
	3220.57	89.1344	3104.31	42.7256
	3216.27	89.1344	3100	42.7256
	3211.96	89.1344	3095.69	42.7256
	3203.35	89.1344	3091.39	42.7256
	3207.66	89.1344	3087.08	42.7256
	3199.04	89.1344	3082.78	42.7256
	3194.74	89.1344	3078.47	42.7256
	3190.43	89.1344	3074.16	42.7256
	3186.12	89.1344	3069.86	42.7256
	3181.82	89.1344	3065.55	42.7256
	3177.51	89.1344	3061.24	42.7256
	3168.9	89.1344	3056.94	42.7256
	3173.21	89.1344	3052.63	42.7256
	3164.59	89.1344	3048.33	42.7256
	3160.29	89.1344	3044.02	42.7256
	3155.98	88.9503	3035.41	42.7256
	3151.67	88.9503	3031.1	42.7256
	3147.37	88.9503	3026.79	42.7256
	3143.06	88.9503	3022.49	42.7256
	3138.76	88.9503	3018.18	42.7256
	3134.45	88.9503	3018.18	42.5414
	3130.14	88.9503	3018.18	42.3573
	3125.84	88.9503	3018.18	41.989
	3121.53	88.9503	3018.18	41.8048
	3117.22	88.9503	3018.18	41.6206
	3112.92	88.9503	3013.88	41.4365
	3108.61	88.9503	3013.88	41.2523
	3104.31	88.9503	3013.88	41.0681
	3100	88.7661	3013.88	40.884
	3095.69	88.7661	3013.88	40.6998
	3091.39	88.7661	3009.57	40.6998
	3087.08	88.7661	3005.26	40.884
	3082.78	88.7661	3005.26	41.0681
	3078.47	88.7661	3005.26	41.2523
	3074.16	88.7661	3005.26	41.4365
	3069.86	88.7661	3005.26	41.8048
	3065.55	88.7661	3005.26	42.1731
	3061.24	88.7661	3005.26	42.3573
	3056.94	88.7661	3005.26	42.7256
	3052.63	88.7661	3005.26	42.9098
	3044.02	88.582	3005.26	43.0939
	3039.71	88.582	3000.96	43.0939
	3035.41	88.582	2996.65	43.0939
	3031.1	88.582	2996.65	42.9098
	3026.79	88.582	2996.65	42.5414
	3022.49	88.582	2992.34	42.3573
	3018.18	88.3978	2992.34	41.989
	3013.88	88.3978	2992.34	41.6206
	3009.57	88.3978	2992.34	41.2523
	3005.26	88.3978	2992.34	40.884
	3000.96	88.3978	2992.34	40.5157
	2992.34	88.3978	2992.34	40.3315
	2996.65	88.3978	2992.34	39.9632
	2988.04	88.3978	2992.34	39.5948
	2983.73	88.3978	2992.34	39.4107
	2975.12	88.3978	2992.34	39.2265
	2979.43	88.3978	2988.04	39.2265
	2970.81	88.3978	2988.04	39.0424
	2966.51	88.3978	2983.73	39.0424
	2962.2	88.3978	2983.73	39.2265
	2957.89	88.3978	2979.43	39.2265
	2953.59	88.3978	2979.43	39.4107
	2949.28	88.3978	2979.43	39.779
	2944.98	88.3978	2975.12	40.1473
	2940.67	88.3978	2975.12	40.6998
	2936.36	88.3978	2975.12	40.884
	2932.06	88.2136	2975.12	41.0681
	2927.75	88.2136	2975.12	41.2523
	2923.44	88.2136	2975.12	41.6206
	2919.14	88.2136	2975.12	41.8048
	2914.83	88.2136	2975.12	42.1731
	2910.53	88.2136	2975.12	42.3573
	2906.22	88.2136	2975.12	42.7256
	2901.91	88.2136	2975.12	42.9098
	2897.61	88.2136	2975.12	43.2781
	2893.3	88.2136	2975.12	43.4622
	2884.69	88.2136	2970.81	43.6464
	2880.38	88.2136	2966.51	43.6464
	2871.77	88.2136	2962.2	43.4622
	2867.46	88.2136	2962.2	43.2781
	2876.08	88.2136	2957.89	43.2781
	2889	88.2136	2953.59	43.2781
	2863.16	88.2136	2949.28	43.2781
	2858.85	88.2136	2944.98	43.0939
	2854.55	88.3978	2940.67	43.0939
	2850.24	88.3978	2940.67	43.2781
	2845.93	88.3978	2936.36	43.6464
	2841.63	88.582	2932.06	43.8306
	2837.32	88.582	2927.75	44.0147
	2833.01	88.582	2923.44	44.0147
	2828.71	88.7661	2919.14	44.0147
	2824.4	88.7661	2914.83	43.8306
	2820.1	88.7661	2910.53	43.6464
	2811.48	88.7661	2906.22	43.2781
	2815.79	88.7661	2901.91	43.2781
	2807.18	88.7661	2897.61	43.2781
	2802.87	88.7661	2893.3	43.2781
	2798.56	88.7661	2884.69	43.2781
	2794.26	88.7661	2889	43.2781
	2785.65	88.7661	2880.38	43.2781
	2789.95	88.7661	2876.08	43.2781
	2781.34	88.7661	2871.77	43.2781
	2777.03	88.7661	2867.46	43.2781
	2772.73	88.7661	2863.16	43.2781
	2764.11	88.7661	2854.55	43.2781
	2768.42	88.7661	2858.85	43.2781
	2759.81	88.7661	2850.24	43.2781
	2755.5	88.7661	2845.93	43.0939
	2751.2	88.7661	2841.63	43.0939
	2746.89	88.7661	2837.32	43.0939
	2742.58	88.7661	2833.01	43.0939
	2738.28	88.7661	2828.71	43.0939
	2733.97	88.7661	2824.4	43.0939
	2725.36	88.7661	2820.1	43.0939
	2729.67	88.7661	2807.18	43.0939
	2721.05	88.7661	2815.79	43.0939
	2716.75	88.7661	2811.48	43.0939
	2712.44	88.7661	2798.56	43.0939
	2708.13	88.7661	2802.87	43.0939
	2703.83	88.7661	2794.26	43.0939
	2699.52	88.582	2789.95	43.0939
	2695.22	88.582	2785.65	43.0939
	2690.91	88.582	2781.34	43.0939
	2686.6	88.582	2777.03	43.0939
	2682.3	88.582	2772.73	43.0939
	2677.99	88.582	2768.42	43.0939
	2673.68	88.582	2764.11	43.0939
	2669.38	88.582	2759.81	43.0939
	2665.07	88.582	2755.5	43.0939
	2660.77	88.582	2751.2	43.0939
	2656.46	88.582	2746.89	43.0939
	2652.15	88.582	2742.58	43.0939
	2647.85	88.582	2738.28	43.0939
	2639.23	88.582	2729.67	43.0939
	2643.54	88.582	2725.36	43.0939
	2634.93	88.582	2716.75	43.0939
	2630.62	88.582	2712.44	43.0939
	2626.32	88.582	2708.13	43.0939
	2622.01	88.582	2721.05	43.0939
	2617.7	88.582	2733.97	43.0939
	2613.4	88.582	2703.83	43.0939
	2609.09	88.3978	2699.52	43.0939
	2604.78	88.3978	2695.22	43.0939
	2600.48	88.3978	2690.91	43.0939
	2596.17	88.3978	2686.6	43.0939
	2591.87	88.3978	2682.3	43.0939
	2587.56	88.3978	2677.99	43.0939
	2583.25	88.3978	2673.68	43.0939
	2574.64	88.3978	2669.38	43.0939
	2578.95	88.3978	2665.07	43.0939
	2570.33	88.3978	2660.77	43.0939
	2561.72	88.3978	2652.15	43.0939
	2566.03	88.3978	2656.46	43.0939
	2557.42	88.3978	2647.85	43.0939
	2553.11	88.3978	2643.54	43.0939
	2548.8	88.3978	2639.23	43.0939
	2544.5	88.3978	2634.93	43.0939
	2540.19	88.3978	2630.62	43.0939
	2531.58	88.3978	2626.32	43.0939
	2535.89	88.3978	2622.01	43.0939
	2527.27	88.3978	2617.7	43.0939
	2522.97	88.3978	2613.4	43.0939
	2518.66	88.3978	2609.09	43.0939
	2514.35	88.3978	2604.78	43.0939
	2510.05	88.3978	2600.48	43.0939
	2505.74	88.3978	2596.17	43.0939
	2501.44	88.3978	2591.87	43.0939
	2497.13	88.3978	2587.56	43.0939
	2492.82	88.3978	2583.25	43.0939
	2488.52	88.3978	2578.95	43.0939
	2484.21	88.3978	2574.64	43.0939
	2479.9	88.3978	2570.33	43.0939
	2475.6	88.3978	2566.03	43.0939
	2471.29	88.3978	2561.72	43.0939
	2471.29	88.2136	2557.42	43.0939
	2466.99	88.2136	2553.11	43.0939
	2462.68	88.2136	2548.8	43.0939
	2458.37	88.2136	2544.5	43.0939
	2454.07	88.2136	2540.19	43.0939
	2441.15	88.2136	2535.89	43.0939
	2445.45	88.2136	2531.58	43.0939
	2449.76	88.2136	2527.27	43.0939
	2436.84	88.2136	2522.97	43.0939
	2432.54	88.2136	2518.66	43.0939
	2428.23	88.2136	2514.35	43.0939
	2423.92	88.2136	2510.05	43.0939
	2415.31	88.2136	2505.74	43.0939
	2419.62	88.2136	2501.44	43.0939
	2411	88.2136	2497.13	43.0939
	2406.7	88.2136	2492.82	43.0939
	2402.39	88.2136	2488.52	43.0939
	2398.09	88.2136	2484.21	43.0939
	2393.78	88.2136	2479.9	43.0939
	2389.47	88.2136	2475.6	43.0939
	2385.17	88.2136	2466.99	43.0939
	2376.56	88.2136	2471.29	43.0939
	2380.86	88.2136	2462.68	43.0939
	2372.25	88.2136	2458.37	43.0939
	2363.64	88.2136	2454.07	43.0939
	2367.94	88.2136	2449.76	43.0939
	2359.33	88.2136	2445.45	43.0939
	2355.02	88.2136	2441.15	43.0939
	2350.72	88.2136	2436.84	43.0939
	2346.41	88.2136	2432.54	43.0939
	2337.8	88.2136	2428.23	43.0939
	2342.11	88.2136	2423.92	43.0939
	2333.49	88.2136	2415.31	43.0939
	2329.19	88.2136	2419.62	43.0939
	2324.88	88.2136	2411	43.0939
	2320.57	88.2136	2406.7	43.0939
	2316.27	88.2136	2398.09	43.0939
	2307.66	88.2136	2402.39	43.0939
	2311.96	88.2136	2393.78	43.0939
	2303.35	88.2136	2389.47	43.0939
	2294.74	88.2136	2385.17	43.0939
	2299.04	88.2136	2380.86	43.0939
	2290.43	88.2136	2372.25	43.0939
	2286.12	88.2136	2376.56	43.0939
	2281.82	88.2136	2367.94	43.0939
	2277.51	88.2136	2363.64	43.0939
	2273.21	88.2136	2359.33	43.0939
	2268.9	88.2136	2350.72	43.0939
	2264.59	88.2136	2355.02	43.0939
	2260.29	88.2136	2346.41	43.0939
	2255.98	88.2136	2342.11	43.0939
	2251.67	88.2136	2337.8	43.0939
	2247.37	88.2136	2333.49	43.0939
	2243.06	88.2136	2324.88	43.0939
	2234.45	88.2136	2320.57	43.0939
	2238.76	88.2136	2316.27	43.0939
	2230.14	88.2136	2329.19	43.0939
	2221.53	88.2136	2311.96	43.0939
	2225.84	88.2136	2307.66	43.0939
	2217.22	88.2136	2299.04	43.0939
	2212.92	88.2136	2303.35	43.0939
	2208.61	88.2136	2294.74	43.0939
	2204.31	88.2136	2290.43	43.0939
	2200	88.2136	2286.12	43.0939
	2195.69	88.2136	2281.82	43.0939
	2187.08	88.2136	2277.51	43.0939
	2191.39	88.2136	2273.21	43.0939
	2182.78	88.2136	2268.9	43.0939
	2178.47	88.2136	2260.29	43.0939
	2174.16	88.2136	2264.59	43.0939
	2169.86	88.2136	2255.98	43.0939
	2165.55	88.2136	2251.67	43.0939
	2161.24	88.2136	2247.37	43.0939
	2156.94	88.2136	2243.06	43.0939
	2152.63	88.2136	2238.76	43.0939
	2144.02	88.2136	2234.45	43.0939
	2148.33	88.2136	2230.14	43.0939
	2139.71	88.2136	2221.53	43.0939
	2135.41	88.2136	2225.84	43.0939
	2135.41	88.0295	2212.92	43.0939
	2131.1	88.0295	2217.22	43.0939
	2126.79	88.0295	2208.61	43.0939
	2122.49	88.0295	2204.31	43.0939
	2118.18	88.0295	2200	43.0939
	2113.88	88.0295	2195.69	43.0939
	2109.57	88.0295	2191.39	43.0939
	2105.26	88.0295	2182.78	43.0939
	2100.96	88.0295	2187.08	43.0939
	2096.65	88.0295	2178.47	43.0939
	2088.04	88.0295	2174.16	43.0939
	2092.34	88.0295	2169.86	43.0939
	2083.73	88.0295	2161.24	43.0939
	2075.12	88.0295	2165.55	43.0939
	2079.43	88.0295	2156.94	43.0939
	2070.81	88.0295	2152.63	43.0939
	2066.51	88.0295	2148.33	43.0939
	2062.2	88.0295	2139.71	43.0939
	2057.89	88.0295	2144.02	43.0939
	2057.89	87.8453	2131.1	43.0939
	2053.59	87.8453	2135.41	43.0939
	2049.28	87.8453	2126.79	43.0939
	2044.98	87.8453	2118.18	43.0939
	2040.67	87.8453	2122.49	43.0939
	2036.36	87.8453	2113.88	43.0939
	2032.06	87.8453	2105.26	43.0939
	2023.44	87.8453	2109.57	43.0939
	2027.75	87.8453	2096.65	43.0939
	2019.14	87.8453	2100.96	43.0939
	2014.83	87.8453	2092.34	43.0939
	2010.53	87.8453	2083.73	43.0939
	2006.22	87.8453	2088.04	43.0939
	1997.61	87.8453	2075.12	43.0939
	2001.91	87.8453	2079.43	43.0939
	1993.3	87.8453	2066.51	43.0939
	1984.69	87.8453	2070.81	43.0939
	1989	87.8453	2057.89	43.0939
	1980.38	87.8453	2062.2	43.0939
	1976.08	87.8453	2053.59	43.0939
	1971.77	87.8453	2044.98	43.0939
	1967.46	87.8453	2049.28	43.0939
	1963.16	87.8453	2036.36	43.0939
	1958.85	87.8453	2040.67	43.0939
	1954.55	87.8453	2032.06	43.0939
	1950.24	87.8453	2023.44	43.0939
	1945.93	87.8453	2027.75	43.0939
	1941.63	87.8453	2019.14	43.0939
	1937.32	87.8453	2014.83	43.0939
	1933.01	87.8453	2010.53	43.0939
	1928.71	87.8453	2006.22	43.0939
	1924.4	87.8453	1997.61	43.0939
	1920.1	87.8453	2001.91	43.0939
	1915.79	87.8453	1993.3	43.0939
	1911.48	87.8453	1984.69	43.0939
	1907.18	87.8453	1989	43.0939
	1902.87	87.8453	1980.38	43.0939
	1902.87	87.6611	1976.08	43.0939
	1898.56	87.6611	1971.77	43.0939
	1894.26	87.6611	1967.46	43.0939
	1889.95	87.6611	1958.85	43.0939
	1885.65	87.6611	1963.16	43.0939
	1881.34	87.6611	1954.55	43.0939
	1877.03	87.6611	1950.24	43.0939
	1868.42	87.6611	1941.63	43.0939
	1872.73	87.6611	1945.93	43.0939
	1859.81	87.6611	1937.32	43.0939
	1864.11	87.6611	1933.01	43.0939
	1855.5	87.6611	1924.4	43.0939
	1851.2	87.6611	1928.71	43.0939
	1846.89	87.6611	1920.1	43.0939
	1842.58	87.6611	1915.79	43.0939
	1838.28	87.6611	1907.18	43.0939
	1829.67	87.6611	1911.48	43.0939
	1821.05	87.6611	1898.56	43.0939
	1833.97	87.6611	1902.87	43.0939
	1825.36	87.6611	1889.95	43.0939
	1816.75	87.6611	1881.34	43.0939
	1812.44	87.6611	1894.26	43.0939
	1808.13	87.6611	1885.65	43.0939
	1803.83	87.6611	1877.03	43.0939
	1799.52	87.6611	1868.42	43.0939
	1795.22	87.6611	1872.73	43.0939
	1790.91	87.6611	1864.11	43.0939
	1786.6	87.6611	1859.81	43.0939
	1782.3	87.6611	1855.5	43.0939
	1777.99	87.6611	1846.89	43.0939
	1773.68	87.6611	1851.2	43.0939
	1769.38	87.6611	1842.58	43.0939
	1765.07	87.6611	1838.28	43.0939
	1760.77	87.6611	1833.97	43.0939
	1752.15	87.6611	1829.67	43.0939
	1756.46	87.6611	1821.05	43.0939
	1747.85	87.6611	1825.36	43.0939
	1743.54	87.6611	1816.75	43.0939
	1739.23	87.6611	1812.44	43.0939
	1734.93	87.6611	1808.13	43.0939
	1730.62	87.6611	1799.52	43.0939
	1726.32	87.6611	1803.83	43.0939
	1722.01	87.6611	1790.91	43.0939
	1717.7	87.6611	1795.22	43.0939
	1713.4	87.6611	1786.6	43.0939
	1709.09	87.6611	1782.3	42.9098
	1704.78	87.6611	1777.99	42.7256
	1700.48	87.6611	1773.68	42.5414
	1696.17	87.6611	1773.68	42.1731
	1691.87	87.6611	1769.38	41.989
	1687.56	87.6611	1765.07	41.6206
	1683.25	87.6611	1760.77	41.2523
	1678.95	87.6611	1760.77	40.884
	1674.64	87.477	1756.46	40.5157
	1670.33	87.2928	1752.15	39.9632
	1666.03	87.1087	1752.15	39.5948
	1661.72	86.9245	1747.85	39.0424
	1657.42	86.7403	1747.85	38.4899
	1653.11	86.5562	1743.54	38.3057
	1648.8	86.372	1743.54	37.9374
	1644.5	86.372	1739.23	37.7532
	1640.19	86.372	1739.23	37.5691
	1635.89	86.372	1739.23	37.3849
	1631.58	86.372	1734.93	37.2007
	1627.27	86.372	1734.93	37.0166
	1622.97	86.5562	1734.93	36.8324
	1614.35	86.9245	1730.62	36.6483
	1618.66	86.7403	1726.32	36.6483
	1610.05	87.1087	1722.01	36.6483
	1605.74	87.1087	1717.7	36.8324
	1601.44	87.1087	1713.4	37.0166
	1597.13	87.1087	1709.09	37.3849
	1592.82	87.1087	1709.09	37.7532
	1588.52	87.1087	1704.78	38.1215
	1584.21	86.9245	1704.78	38.4899
	1579.9	86.7403	1704.78	38.8582
	1575.6	86.5562	1700.48	39.2265
	1575.6	86.372	1700.48	39.4107
	1571.29	86.1878	1700.48	39.5948
	1571.29	86.0037	1700.48	40.1473
	1571.29	85.8195	1700.48	40.3315
	1566.99	85.8195	1700.48	40.6998
	1566.99	85.4512	1700.48	40.5157
	1566.99	85.267	1700.48	39.9632
	1562.68	85.267	1700.48	39.779
	1562.68	85.0829	1700.48	40.884
	1562.68	84.7145	1696.17	41.0681
	1562.68	84.8987	1691.87	41.2523
	1562.68	84.5304	1687.56	41.6206
	1562.68	84.3462	1683.25	41.8048
	1562.68	84.1621	1678.95	41.8048
	1562.68	83.9779	1674.64	41.8048
	1562.68	83.7937	1670.33	41.989
	1562.68	83.4254	1666.03	42.1731
	1562.68	83.6096	1661.72	42.1731
	1562.68	83.2413	1661.72	41.989
	1562.68	83.0571	1661.72	41.8048
	1562.68	82.8729	1661.72	41.6206
	1562.68	82.5046	1657.42	41.4365
	1562.68	82.6888	1653.11	41.4365
	1562.68	82.1363	1648.8	41.6206
	1562.68	81.9521	1644.5	41.989
	1562.68	82.3204	1644.5	42.1731
	1562.68	81.768	1644.5	42.3573
	1562.68	81.5838	1644.5	42.5414
	1562.68	81.3996	1644.5	42.7256
	1562.68	81.2155	1640.19	42.7256
	1562.68	81.0313	1635.89	42.7256
	1562.68	80.8471	1635.89	42.5414
	1562.68	80.4788	1631.58	42.1731
	1562.68	80.663	1631.58	41.989
	1562.68	80.2947	1627.27	41.8048
	1562.68	80.1105	1622.97	41.6206
	1562.68	79.9263	1618.66	41.6206
	1562.68	79.7422	1614.35	41.6206
	1562.68	79.558	1605.74	41.8048
	1562.68	79.1897	1605.74	41.989
	1562.68	79.3738	1601.44	41.989
	1562.68	79.0055	1601.44	41.8048
	1562.68	78.8214	1597.13	41.4365
	1562.68	78.6372	1592.82	41.4365
	1562.68	78.453	1584.21	41.8048
	1562.68	78.2689	1584.21	41.989
	1562.68	78.0847	1579.9	41.989
	1562.68	77.9006	1575.6	41.8048
	1562.68	77.7164	1571.29	41.4365
	1562.68	77.5322	1571.29	41.2523
	1562.68	77.3481	1571.29	40.884
	1562.68	77.1639	1566.99	40.6998
	1562.68	76.9797	1566.99	40.5157
	1562.68	76.7956	1566.99	40.1473
	1562.68	76.6114	1566.99	40.3315
	1562.68	76.4273	1566.99	39.9632
	1558.37	76.4273	1566.99	39.5948
	1558.37	76.2431	1566.99	39.4107
	1558.37	76.0589	1566.99	39.0424
	1558.37	75.8748	1566.99	39.779
	1558.37	75.6906	1566.99	39.2265
	1558.37	75.5064	1566.99	38.8582
	1558.37	75.3223	1566.99	38.674
	1558.37	75.1381	1566.99	38.4899
	1558.37	74.954	1566.99	38.3057
	1558.37	74.7698	1566.99	38.1215
	1558.37	74.4015	1562.68	37.9374
	1558.37	74.5856	1562.68	37.7532
	1558.37	74.2173	1562.68	37.5691
	1558.37	74.0331	1562.68	37.2007
	1558.37	73.849	1562.68	36.8324
	1558.37	73.6648	1562.68	37.0166
	1554.07	73.4807	1562.68	37.3849
	1549.76	73.4807	1562.68	36.6483
	1545.45	73.4807	1562.68	36.2799
	1545.45	73.6648	1562.68	35.9116
	1545.45	73.849	1562.68	35.5433
	1545.45	74.0331	1562.68	35.175
	1545.45	74.2173	1562.68	35.7274
	1545.45	74.7698	1562.68	36.0958
	1545.45	74.4015	1562.68	36.4641
	1545.45	74.5856	1562.68	35.3591
	1545.45	74.954	1562.68	34.9908
	1545.45	75.1381	1562.68	34.8066
	1545.45	75.3223	1562.68	34.6225
	1545.45	75.5064	1562.68	34.4383
	1545.45	75.6906	1562.68	34.07
	1545.45	75.8748	1562.68	34.2541
	1545.45	76.0589	1562.68	33.7017
	1545.45	76.2431	1562.68	33.8858
	1545.45	76.4273	1562.68	33.5175
	1545.45	76.6114	1562.68	33.3333
	1545.45	76.7956	1562.68	33.1492
	1545.45	76.9797	1562.68	32.965
	1545.45	77.1639	1562.68	32.7808
	1545.45	77.3481	1562.68	32.5967
	1545.45	77.5322	1562.68	32.4125
	1541.15	77.7164	1562.68	32.2284
	1541.15	77.9006	1562.68	32.0442
	1541.15	78.0847	1562.68	31.86
	1541.15	78.2689	1558.37	31.6759
	1541.15	78.6372	1558.37	31.4917
	1541.15	78.453	1554.07	31.4917
	1541.15	78.8214	1549.76	31.4917
	1541.15	79.0055	1545.45	31.6759
	1541.15	79.1897	1545.45	31.86
	1541.15	79.3738	1545.45	32.0442
	1541.15	79.558	1545.45	32.2284
	1541.15	79.7422	1545.45	32.4125
	1541.15	79.9263	1545.45	32.5967
	1541.15	80.1105	1545.45	32.7808
	1541.15	80.2947	1545.45	32.965
	1541.15	80.4788	1545.45	33.1492
	1541.15	80.663	1545.45	33.3333
	1541.15	80.8471	1545.45	33.7017
	1541.15	81.0313	1545.45	33.5175
	1541.15	81.2155	1545.45	33.8858
	1541.15	81.3996	1545.45	34.07
	1541.15	81.5838	1545.45	34.2541
	1541.15	81.768	1545.45	34.4383
	1541.15	81.9521	1545.45	34.6225
	1536.84	82.1363	1545.45	34.8066
	1536.84	82.5046	1545.45	34.9908
	1536.84	82.3204	1541.15	34.9908
	1536.84	82.6888	1541.15	35.175
	1536.84	82.8729	1541.15	35.3591
	1536.84	83.0571	1541.15	35.5433
	1536.84	83.2413	1541.15	35.7274
	1536.84	83.4254	1541.15	35.9116
	1536.84	83.6096	1541.15	36.0958
	1536.84	83.7937	1541.15	36.2799
	1536.84	83.9779	1541.15	36.4641
	1536.84	84.1621	1541.15	36.6483
	1532.54	84.1621	1541.15	36.8324
	1532.54	84.3462	1541.15	37.0166
	1532.54	84.5304	1541.15	37.2007
	1532.54	84.7145	1541.15	37.3849
	1532.54	84.8987	1541.15	37.5691
	1532.54	85.0829	1541.15	37.7532
	1532.54	85.267	1541.15	37.9374
	1532.54	85.4512	1541.15	38.1215
	1532.54	85.6354	1541.15	38.3057
	1532.54	85.8195	1541.15	38.4899
	1532.54	86.0037	1541.15	38.674
	1532.54	86.1878	1541.15	38.8582
	1532.54	86.372	1541.15	39.0424
	1532.54	86.5562	1541.15	39.2265
	1528.23	86.7403	1541.15	39.4107
	1523.92	86.9245	1541.15	39.5948
	1523.92	87.1087	1536.84	39.779
	1519.62	87.2928	1536.84	39.9632
	1515.31	87.2928	1536.84	40.1473
	1511	87.2928	1536.84	40.3315
	1506.7	87.2928	1536.84	40.5157
	1502.39	87.1087	1536.84	40.6998
	1498.09	86.9245	1536.84	40.884
	1493.78	86.7403	1536.84	41.0681
	1489.47	86.5562	1536.84	41.2523
	1485.17	86.372	1532.54	41.4365
	1485.17	86.0037	1528.23	41.6206
	1485.17	86.1878	1523.92	41.8048
	1485.17	85.8195	1523.92	41.989
	1485.17	85.6354	1523.92	42.1731
	1485.17	85.4512	1519.62	42.3573
	1485.17	85.267	1515.31	42.3573
	1480.86	85.0829	1511	42.3573
	1480.86	84.8987	1506.7	42.3573
	1480.86	84.7145	1502.39	42.3573
	1480.86	84.5304	1498.09	42.1731
	1480.86	84.3462	1493.78	41.989
	1480.86	84.1621	1489.47	41.8048
	1480.86	83.9779	1485.17	41.6206
	1480.86	83.7937	1485.17	41.4365
	1480.86	83.6096	1485.17	41.2523
	1480.86	83.4254	1485.17	41.0681
	1480.86	83.2413	1480.86	41.0681
	1480.86	83.0571	1480.86	40.884
	1480.86	82.8729	1480.86	40.6998
	1480.86	82.6888	1476.56	40.5157
	1480.86	82.3204	1476.56	40.3315
	1480.86	82.5046	1476.56	40.1473
	1480.86	82.1363	1476.56	39.9632
	1480.86	81.9521	1476.56	39.779
	1480.86	81.768	1476.56	39.4107
	1480.86	81.5838	1476.56	39.5948
	1480.86	81.3996	1476.56	39.2265
	1480.86	81.2155	1476.56	39.0424
	1480.86	81.0313	1476.56	38.674
	1480.86	80.8471	1476.56	38.8582
	1480.86	80.663	1476.56	38.4899
	1480.86	80.4788	1476.56	38.3057
	1476.56	80.2947	1476.56	38.1215
	1476.56	80.1105	1476.56	37.9374
	1476.56	79.7422	1476.56	37.7532
	1476.56	79.9263	1476.56	37.3849
	1476.56	79.558	1476.56	37.5691
	1476.56	79.3738	1476.56	37.2007
	1476.56	79.1897	1476.56	37.0166
	1476.56	79.0055	1476.56	36.6483
	1476.56	78.8214	1476.56	36.8324
	1476.56	78.6372	1476.56	36.4641
	1476.56	78.453	1476.56	36.0958
	1476.56	78.2689	1476.56	36.2799
	1476.56	78.0847	1476.56	35.7274
	1476.56	77.9006	1476.56	35.9116
	1476.56	77.7164	1476.56	35.5433
	1476.56	77.5322	1476.56	35.3591
	1476.56	77.3481	1476.56	35.175
	1476.56	77.1639	1476.56	34.9908
	1476.56	76.9797	1476.56	34.8066
	1476.56	76.7956	1476.56	34.6225
	1476.56	76.6114	1476.56	34.4383
	1476.56	76.4273	1476.56	34.2541
	1476.56	76.2431	1476.56	34.07
	1476.56	76.0589	1476.56	33.8858
	1476.56	75.6906	1476.56	33.7017
	1476.56	75.8748	1476.56	33.5175
	1476.56	75.5064	1476.56	33.3333
	1476.56	75.3223	1476.56	33.1492
	1476.56	75.1381	1476.56	32.965
	1476.56	74.954	1476.56	32.7808
	1476.56	74.7698	1472.25	32.7808
	1476.56	74.5856	1472.25	32.5967
	1472.25	74.4015	1472.25	32.4125
	1472.25	74.2173	1467.94	32.2284
	1467.94	74.2173	1467.94	32.4125
	1467.94	74.4015	1463.64	32.4125
	1467.94	74.5856	1463.64	32.7808
	1467.94	74.7698	1463.64	33.1492
	1467.94	74.954	1463.64	33.3333
	1467.94	75.1381	1463.64	33.8858
	1467.94	75.5064	1463.64	33.7017
	1467.94	75.6906	1463.64	32.965
	1467.94	75.3223	1463.64	32.5967
	1467.94	75.8748	1463.64	33.5175
	1467.94	76.0589	1463.64	34.07
	1467.94	76.2431	1463.64	34.2541
	1467.94	76.4273	1463.64	34.4383
	1467.94	76.6114	1463.64	34.6225
	1467.94	76.7956	1463.64	34.8066
	1467.94	76.9797	1463.64	34.9908
	1467.94	77.1639	1459.33	34.9908
	1467.94	77.3481	1459.33	34.8066
	1467.94	77.5322	1459.33	34.6225
	1467.94	77.7164	1459.33	34.4383
	1467.94	77.9006	1459.33	34.2541
	1467.94	78.0847	1459.33	34.07
	1467.94	78.2689	1459.33	33.8858
	1463.64	78.2689	1459.33	33.5175
	1459.33	78.2689	1459.33	33.3333
	1459.33	78.0847	1459.33	33.1492
	1459.33	77.9006	1459.33	32.7808
	1459.33	77.7164	1459.33	32.4125
	1459.33	77.5322	1459.33	32.965
	1459.33	77.3481	1459.33	33.7017
	1459.33	77.1639	1459.33	32.5967
	1459.33	76.9797	1459.33	32.2284
	1459.33	76.7956	1459.33	32.0442
	1459.33	76.4273	1459.33	31.86
	1459.33	76.6114	1459.33	31.6759
	1459.33	76.2431	1459.33	31.4917
	1459.33	76.0589	1459.33	31.3076
	1459.33	75.8748	1459.33	31.1234
	1459.33	75.6906	1459.33	30.9392
	1459.33	75.5064	1459.33	30.7551
	1459.33	75.3223	1459.33	30.5709
	1459.33	75.1381	1459.33	30.3867
	1459.33	74.954	1459.33	30.2026
	1459.33	74.7698	1459.33	30.0184
	1459.33	74.5856	1459.33	29.8343
	1459.33	74.4015	1459.33	29.6501
	1459.33	74.2173	1459.33	29.4659
	1459.33	74.0331	1459.33	29.2818
	1459.33	73.849	1459.33	29.0976
	1459.33	73.6648	1459.33	28.9134
	1459.33	73.4807	1459.33	28.7293
	1459.33	73.2965	1459.33	28.361
	1459.33	73.1123	1459.33	28.5451
	1459.33	72.9282	1459.33	28.1768
	1459.33	72.5599	1459.33	27.9926
	1459.33	72.744	1459.33	27.8085
	1459.33	72.1915	1459.33	27.6243
	1459.33	72.3757	1455.02	27.4401
	1459.33	72.0074	1455.02	27.256
	1459.33	71.8232	1450.72	27.256
	1459.33	71.639	1450.72	27.4401
	1459.33	71.4549	1450.72	27.6243
	1459.33	71.2707	1450.72	27.8085
	1459.33	71.0866	1450.72	28.1768
	1459.33	70.9024	1450.72	27.9926
	1459.33	70.7182	1450.72	28.361
	1459.33	70.1657	1450.72	28.7293
	1459.33	70.5341	1450.72	28.5451
	1459.33	70.3499	1450.72	28.9134
	1459.33	69.9816	1450.72	29.0976
	1459.33	69.7974	1450.72	29.2818
	1459.33	69.6133	1450.72	29.4659
	1459.33	69.4291	1446.41	29.6501
	1459.33	69.0608	1446.41	29.8343
	1459.33	69.2449	1446.41	30.0184
	1459.33	68.8766	1446.41	30.2026
	1459.33	68.6924	1446.41	30.3867
	1459.33	68.5083	1446.41	30.5709
	1459.33	68.3241	1446.41	30.7551
	1459.33	68.14	1446.41	30.9392
	1459.33	67.9558	1446.41	31.1234
	1459.33	67.7716	1446.41	31.3076
	1459.33	67.5875	1446.41	31.4917
	1459.33	67.4033	1446.41	31.6759
	1459.33	67.2192	1446.41	31.86
	1455.02	67.035	1446.41	32.0442
	1450.72	67.035	1446.41	32.2284
	1446.41	67.2192	1446.41	32.5967
	1446.41	67.4033	1446.41	32.4125
	1446.41	67.5875	1446.41	32.7808
	1446.41	67.7716	1446.41	32.965
	1446.41	67.9558	1446.41	33.1492
	1446.41	68.3241	1446.41	33.3333
	1446.41	68.14	1446.41	33.5175
	1446.41	68.5083	1446.41	33.7017
	1446.41	68.6924	1446.41	33.8858
	1446.41	68.8766	1446.41	34.07
	1446.41	69.0608	1446.41	34.2541
	1446.41	69.2449	1446.41	34.4383
	1446.41	69.4291	1442.11	34.6225
	1446.41	69.6133	1442.11	34.8066
	1446.41	69.7974	1442.11	34.9908
	1446.41	69.9816	1442.11	35.175
	1446.41	70.1657	1442.11	35.5433
	1446.41	70.3499	1442.11	35.3591
	1446.41	70.5341	1442.11	35.7274
	1446.41	70.7182	1442.11	35.9116
	1446.41	70.9024	1442.11	36.0958
	1446.41	71.0866	1442.11	36.2799
	1446.41	71.2707	1442.11	36.4641
	1446.41	71.4549	1442.11	36.8324
	1446.41	71.639	1442.11	36.6483
	1446.41	71.8232	1442.11	37.0166
	1446.41	72.0074	1442.11	37.2007
	1446.41	72.1915	1442.11	37.3849
	1446.41	72.3757	1437.8	37.5691
	1446.41	72.5599	1437.8	37.9374
	1446.41	72.744	1437.8	37.7532
	1446.41	72.9282	1433.49	38.1215
	1446.41	73.1123	1433.49	38.3057
	1446.41	73.2965	1433.49	38.4899
	1446.41	73.6648	1433.49	38.674
	1446.41	73.4807	1429.19	38.674
	1446.41	73.849	1424.88	38.8582
	1446.41	74.0331	1420.57	39.2265
	1446.41	74.2173	1420.57	39.4107
	1446.41	74.4015	1420.57	39.5948
	1446.41	74.5856	1420.57	39.779
	1446.41	74.7698	1420.57	39.9632
	1446.41	74.954	1416.27	40.1473
	1446.41	75.1381	1411.96	40.3315
	1446.41	75.3223	1403.35	40.3315
	1446.41	75.5064	1407.66	40.3315
	1446.41	75.6906	1399.04	40.1473
	1446.41	75.8748	1399.04	39.779
	1446.41	76.0589	1399.04	39.4107
	1446.41	76.2431	1394.74	39.2265
	1446.41	76.4273	1394.74	39.0424
	1446.41	76.6114	1394.74	38.8582
	1446.41	76.7956	1394.74	38.674
	1446.41	76.9797	1394.74	38.3057
	1446.41	77.1639	1394.74	38.4899
	1446.41	77.3481	1394.74	38.1215
	1446.41	77.5322	1394.74	37.9374
	1446.41	77.7164	1394.74	37.5691
	1446.41	77.9006	1394.74	37.7532
	1446.41	78.0847	1394.74	37.3849
	1446.41	78.2689	1394.74	37.2007
	1446.41	78.453	1394.74	37.0166
	1446.41	78.6372	1394.74	36.8324
	1446.41	78.8214	1390.43	36.8324
	1446.41	79.0055	1386.12	36.8324
	1446.41	79.1897	1381.82	36.8324
	1446.41	79.3738	1381.82	37.0166
	1446.41	79.558	1381.82	37.2007
	1446.41	79.7422	1381.82	37.3849
	1446.41	79.9263	1381.82	37.5691
	1446.41	80.1105	1381.82	37.7532
	1446.41	80.2947	1381.82	37.9374
	1446.41	80.4788	1381.82	38.1215
	1446.41	80.663	1381.82	38.3057
	1446.41	80.8471	1381.82	38.4899
	1446.41	81.0313	1377.51	38.4899
	1446.41	81.5838	1377.51	38.674
	1446.41	81.2155	1377.51	38.8582
	1446.41	81.3996	1377.51	39.0424
	1446.41	81.768	1377.51	39.2265
	1446.41	81.9521	1377.51	39.4107
	1446.41	82.1363	1377.51	39.5948
	1446.41	82.3204	1377.51	39.779
	1442.11	82.5046	1373.21	39.779
	1442.11	82.6888	1373.21	39.9632
	1442.11	82.8729	1373.21	40.1473
	1442.11	83.0571	1373.21	40.3315
	1442.11	83.2413	1368.9	40.3315
	1442.11	83.4254	1368.9	40.5157
	1442.11	83.6096	1368.9	40.6998
	1442.11	83.7937	1368.9	40.884
	1442.11	83.9779	1368.9	41.0681
	1442.11	84.1621	1368.9	41.2523
	1437.8	84.5304	1368.9	41.4365
	1433.49	84.7145	1368.9	41.6206
	1429.19	84.8987	1364.59	41.6206
	1429.19	85.267	1360.29	41.6206
	1429.19	85.4512	1355.98	41.6206
	1429.19	85.0829	1351.67	41.6206
	1429.19	85.6354	1347.37	41.8048
	1424.88	85.8195	1343.06	41.989
	1420.57	86.0037	1334.45	42.1731
	1420.57	86.372	1325.84	42.3573
	1416.27	86.5562	1321.53	42.3573
	1411.96	86.7403	1312.92	42.3573
	1411.96	86.9245	1317.22	42.3573
	1407.66	87.1087	1308.61	42.3573
	1403.35	87.2928	1304.31	42.3573
	1399.04	87.2928	1300	42.1731
	1394.74	87.2928	1295.69	41.8048
	1390.43	87.2928	1295.69	41.4365
	1386.12	87.1087	1295.69	40.884
	1381.82	87.1087	1295.69	41.0681
	1377.51	87.1087	1295.69	41.2523
	1368.9	87.1087	1295.69	40.6998
	1364.59	87.1087	1295.69	40.3315
	1355.98	87.1087	1295.69	40.5157
	1351.67	87.1087	1295.69	40.1473
	1360.29	87.1087	1295.69	39.9632
	1347.37	87.1087	1291.39	39.779
	1338.76	87.2928	1291.39	39.5948
	1334.45	87.477	1291.39	39.4107
	1330.14	87.477	1291.39	39.2265
	1325.84	87.477	1291.39	39.0424
	1321.53	87.477	1291.39	38.8582
	1312.92	87.477	1291.39	38.4899
	1317.22	87.477	1291.39	38.1215
	1308.61	87.477	1291.39	37.9374
	1308.61	87.2928	1291.39	37.7532
	1304.31	87.1087	1291.39	37.5691
	1300	86.9245	1291.39	38.3057
	1300	86.7403	1291.39	37.3849
	1300	86.5562	1291.39	37.2007
	1300	86.372	1291.39	37.0166
	1295.69	86.372	1291.39	36.8324
	1295.69	86.1878	1291.39	36.6483
	1295.69	86.0037	1291.39	36.4641
	1295.69	85.8195	1291.39	36.2799
	1295.69	85.6354	1287.08	36.2799
	1295.69	85.4512	1282.78	36.2799
	1295.69	85.267	1278.47	36.2799
	1295.69	85.0829	1278.47	36.4641
	1295.69	84.7145	1278.47	36.6483
	1295.69	84.8987	1278.47	36.8324
	1295.69	84.5304	1278.47	37.0166
	1295.69	84.3462	1278.47	37.2007
	1295.69	84.1621	1278.47	37.3849
	1295.69	83.9779	1278.47	37.5691
	1295.69	83.7937	1278.47	37.7532
	1295.69	83.6096	1278.47	37.9374
	1295.69	83.4254	1278.47	38.1215
	1295.69	83.0571	1278.47	38.3057
	1295.69	82.8729	1274.16	38.3057
	1295.69	83.2413	1269.86	38.3057
	1295.69	82.6888	1265.55	38.3057
	1295.69	82.5046	1265.55	38.1215
	1295.69	82.3204	1265.55	37.9374
	1295.69	81.9521	1265.55	37.7532
	1295.69	82.1363	1265.55	37.5691
	1295.69	81.5838	1265.55	37.3849
	1295.69	81.768	1265.55	37.2007
	1295.69	81.3996	1265.55	37.0166
	1295.69	81.2155	1265.55	36.8324
	1295.69	81.0313	1265.55	36.6483
	1295.69	80.8471	1265.55	36.4641
	1295.69	80.663	1265.55	36.2799
	1295.69	80.4788	1265.55	35.9116
	1295.69	80.2947	1261.24	35.7274
	1295.69	80.1105	1261.24	35.3591
	1291.39	79.9263	1261.24	35.5433
	1291.39	79.7422	1261.24	35.175
	1291.39	79.558	1261.24	34.9908
	1287.08	79.558	1261.24	34.8066
	1282.78	79.558	1261.24	34.6225
	1282.78	79.7422	1261.24	34.4383
	1282.78	79.9263	1261.24	34.2541
	1282.78	80.1105	1256.94	34.2541
	1278.47	80.2947	1252.63	34.2541
	1278.47	80.4788	1252.63	34.6225
	1278.47	80.8471	1252.63	34.4383
	1278.47	80.663	1252.63	34.8066
	1278.47	81.0313	1252.63	34.9908
	1278.47	81.2155	1252.63	35.175
	1278.47	81.3996	1248.33	35.3591
	1278.47	81.5838	1248.33	35.5433
	1278.47	81.768	1248.33	35.7274
	1278.47	81.9521	1248.33	35.9116
	1278.47	82.1363	1248.33	36.0958
	1278.47	82.3204	1248.33	36.2799
	1278.47	82.5046	1248.33	36.6483
	1274.16	82.5046	1248.33	36.4641
	1269.86	82.5046	1248.33	36.8324
	1269.86	82.3204	1244.02	37.0166
	1265.55	82.1363	1244.02	37.2007
	1265.55	81.9521	1244.02	37.3849
	1265.55	81.5838	1244.02	37.5691
	1265.55	81.768	1244.02	37.7532
	1265.55	81.3996	1244.02	37.9374
	1265.55	81.0313	1244.02	38.1215
	1265.55	81.2155	1244.02	38.3057
	1265.55	80.8471	1244.02	38.4899
	1265.55	80.663	1244.02	38.674
	1265.55	80.4788	1244.02	38.8582
	1265.55	80.2947	1239.71	39.0424
	1265.55	80.1105	1235.41	39.0424
	1265.55	79.9263	1231.1	39.0424
	1265.55	79.7422	1226.79	38.8582
	1265.55	79.558	1226.79	38.674
	1261.24	79.1897	1226.79	38.4899
	1261.24	79.0055	1226.79	38.3057
	1261.24	78.8214	1226.79	38.1215
	1261.24	78.6372	1226.79	37.9374
	1261.24	78.453	1226.79	37.7532
	1261.24	78.2689	1222.49	37.5691
	1256.94	78.2689	1222.49	37.3849
	1252.63	78.2689	1222.49	37.2007
	1252.63	78.453	1222.49	37.0166
	1252.63	78.6372	1222.49	36.8324
	1252.63	78.8214	1222.49	36.6483
	1252.63	79.0055	1222.49	36.4641
	1252.63	79.1897	1222.49	36.2799
	1252.63	79.3738	1222.49	36.0958
	1252.63	79.558	1222.49	35.9116
	1248.33	79.558	1222.49	35.7274
	1248.33	79.7422	1222.49	35.5433
	1248.33	79.9263	1222.49	35.3591
	1248.33	80.1105	1222.49	35.175
	1248.33	80.2947	1222.49	34.9908
	1248.33	80.663	1222.49	34.8066
	1248.33	80.4788	1222.49	34.6225
	1248.33	80.8471	1222.49	34.4383
	1248.33	81.0313	1222.49	34.2541
	1248.33	81.2155	1222.49	34.07
	1248.33	81.3996	1222.49	33.8858
	1248.33	81.5838	1222.49	33.7017
	1248.33	81.768	1222.49	33.5175
	1248.33	81.9521	1222.49	33.3333
	1248.33	82.1363	1222.49	33.1492
	1248.33	82.3204	1222.49	32.965
	1248.33	82.5046	1222.49	32.7808
	1248.33	82.6888	1222.49	32.5967
	1248.33	82.8729	1222.49	32.4125
	1248.33	83.0571	1222.49	32.2284
	1248.33	83.2413	1222.49	31.86
	1248.33	83.4254	1222.49	31.4917
	1248.33	83.6096	1222.49	31.1234
	1248.33	83.7937	1222.49	32.0442
	1244.02	83.9779	1222.49	31.6759
	1244.02	84.1621	1222.49	31.3076
	1239.71	84.1621	1222.49	30.9392
	1239.71	84.3462	1222.49	30.7551
	1235.41	84.3462	1222.49	30.5709
	1235.41	84.1621	1222.49	30.3867
	1231.1	84.1621	1222.49	30.2026
	1231.1	83.9779	1222.49	30.0184
	1231.1	83.7937	1222.49	29.8343
	1226.79	83.7937	1222.49	29.6501
	1226.79	83.6096	1222.49	29.4659
	1226.79	83.4254	1222.49	29.2818
	1226.79	83.2413	1222.49	28.9134
	1226.79	83.0571	1222.49	29.0976
	1226.79	82.8729	1222.49	28.7293
	1226.79	82.6888	1222.49	28.5451
	1226.79	82.3204	1222.49	28.361
	1226.79	82.5046	1222.49	28.1768
	1226.79	82.1363	1222.49	27.8085
	1226.79	81.9521	1222.49	27.9926
	1226.79	81.768	1222.49	27.6243
	1226.79	81.5838	1222.49	27.256
	1226.79	81.3996	1222.49	27.4401
	1226.79	81.2155	1222.49	27.0718
	1226.79	81.0313	1218.18	26.8877
	1226.79	80.8471	1218.18	26.7035
	1226.79	80.4788	1218.18	26.5193
	1226.79	80.663	1218.18	26.3352
	1226.79	80.2947	1218.18	26.151
	1226.79	80.1105	1218.18	25.9669
	1226.79	79.9263	1218.18	25.7827
	1226.79	79.7422	1218.18	25.5985
	1226.79	79.558	1218.18	25.4144
	1226.79	79.3738	1218.18	25.2302
	1226.79	79.1897	1213.88	25.046
	1226.79	79.0055	1213.88	24.8619
	1226.79	78.8214	1213.88	24.6777
	1226.79	78.6372	1213.88	24.4936
	1226.79	78.453	1213.88	24.3094
	1226.79	78.2689	1213.88	24.1252
	1226.79	78.0847	1213.88	23.9411
	1226.79	77.9006	1213.88	23.7569
	1226.79	77.7164	1213.88	23.5727
	1226.79	77.5322	1213.88	23.3886
	1226.79	77.3481	1213.88	23.2044
	1226.79	77.1639	1213.88	23.0203
	1226.79	76.9797	1209.57	22.8361
	1226.79	76.7956	1209.57	22.6519
	1226.79	76.6114	1209.57	22.4678
	1226.79	76.2431	1209.57	22.2836
	1226.79	76.4273	1209.57	22.0994
	1226.79	76.0589	1205.26	21.9153
	1226.79	75.8748	1200.96	21.9153
	1226.79	75.6906	1196.65	22.0994
	1226.79	75.5064	1196.65	22.2836
	1226.79	75.3223	1196.65	22.4678
	1226.79	75.1381	1196.65	22.6519
	1226.79	74.954	1196.65	22.8361
	1226.79	74.7698	1196.65	23.0203
	1226.79	74.5856	1196.65	23.2044
	1222.49	74.4015	1196.65	23.3886
	1222.49	74.2173	1196.65	23.5727
	1222.49	74.0331	1196.65	23.7569
	1222.49	73.849	1196.65	23.9411
	1222.49	73.6648	1196.65	24.3094
	1222.49	73.4807	1196.65	24.1252
	1222.49	73.2965	1196.65	24.4936
	1222.49	73.1123	1196.65	24.6777
	1222.49	72.9282	1196.65	24.8619
	1222.49	72.744	1196.65	25.046
	1222.49	72.5599	1196.65	25.2302
	1222.49	72.3757	1196.65	25.4144
	1222.49	72.1915	1196.65	25.5985
	1222.49	72.0074	1196.65	25.7827
	1222.49	71.8232	1196.65	25.9669
	1222.49	71.639	1196.65	26.151
	1222.49	71.4549	1192.34	26.151
	1222.49	71.2707	1192.34	26.3352
	1222.49	71.0866	1192.34	26.5193
	1222.49	70.9024	1192.34	26.7035
	1222.49	70.7182	1192.34	26.8877
	1222.49	70.5341	1192.34	27.0718
	1222.49	70.3499	1192.34	27.256
	1222.49	70.1657	1192.34	27.4401
	1222.49	69.9816	1192.34	27.6243
	1222.49	69.7974	1192.34	27.8085
	1222.49	69.6133	1192.34	27.9926
	1218.18	69.4291	1192.34	28.1768
	1218.18	69.2449	1192.34	28.361
	1218.18	69.0608	1192.34	28.5451
	1218.18	68.8766	1192.34	28.7293
	1218.18	68.6924	1192.34	28.9134
	1218.18	68.5083	1192.34	29.0976
	1218.18	68.3241	1192.34	29.2818
	1218.18	68.14	1192.34	29.4659
	1218.18	67.9558	1192.34	29.6501
	1218.18	67.7716	1192.34	30.0184
	1218.18	67.5875	1192.34	30.2026
	1218.18	67.4033	1192.34	29.8343
	1218.18	67.2192	1192.34	30.3867
	1218.18	67.035	1192.34	30.7551
	1218.18	66.6667	1192.34	30.9392
	1218.18	66.8508	1192.34	30.5709
	1218.18	66.4825	1192.34	31.1234
	1218.18	66.2983	1192.34	31.3076
	1218.18	66.1142	1192.34	31.6759
	1218.18	65.93	1192.34	31.4917
	1218.18	65.7459	1192.34	31.86
	1218.18	65.5617	1192.34	32.0442
	1218.18	65.3775	1192.34	32.2284
	1218.18	65.0092	1192.34	32.4125
	1218.18	65.1934	1192.34	32.5967
	1218.18	64.825	1192.34	32.7808
	1218.18	64.6409	1192.34	32.965
	1218.18	64.0884	1192.34	33.1492
	1218.18	64.2726	1192.34	33.3333
	1218.18	64.4567	1188.04	33.5175
	1218.18	63.7201	1188.04	33.7017
	1218.18	63.9042	1188.04	33.8858
	1218.18	63.3517	1188.04	34.07
	1218.18	63.5359	1188.04	34.2541
	1218.18	63.1676	1188.04	34.4383
	1213.88	62.9834	1188.04	34.6225
	1213.88	62.7993	1188.04	34.8066
	1213.88	62.6151	1188.04	34.9908
	1213.88	62.4309	1188.04	35.175
	1213.88	62.2468	1188.04	35.3591
	1213.88	62.0626	1188.04	35.5433
	1213.88	61.8785	1188.04	35.7274
	1213.88	61.6943	1188.04	35.9116
	1213.88	61.5101	1188.04	36.0958
	1213.88	61.326	1188.04	36.2799
	1213.88	61.1418	1188.04	36.4641
	1213.88	60.9576	1188.04	36.6483
	1213.88	60.7735	1183.73	36.8324
	1213.88	60.5893	1183.73	37.0166
	1213.88	60.4052	1183.73	37.2007
	1213.88	60.221	1183.73	37.3849
	1213.88	60.0368	1183.73	37.5691
	1213.88	59.6685	1183.73	37.7532
	1213.88	59.8527	1183.73	37.9374
	1209.57	59.4843	1183.73	38.1215
	1209.57	59.3002	1183.73	38.3057
	1209.57	59.116	1183.73	38.4899
	1209.57	58.9319	1183.73	38.674
	1209.57	58.7477	1183.73	38.8582
	1209.57	58.5635	1183.73	39.0424
	1205.26	58.5635	1179.43	39.0424
	1200.96	58.5635	1179.43	39.2265
	1200.96	58.7477	1179.43	39.4107
	1200.96	58.9319	1179.43	39.5948
	1200.96	59.116	1179.43	39.779
	1200.96	59.3002	1179.43	39.9632
	1200.96	59.4843	1175.12	39.9632
	1200.96	59.6685	1170.81	39.9632
	1196.65	59.8527	1166.51	39.9632
	1196.65	60.0368	1162.2	39.9632
	1196.65	60.221	1162.2	40.1473
	1196.65	60.4052	1162.2	40.3315
	1196.65	60.5893	1162.2	40.5157
	1196.65	60.7735	1162.2	40.6998
	1196.65	60.9576	1162.2	40.884
	1196.65	61.326	1162.2	41.0681
	1196.65	61.1418	1162.2	41.2523
	1196.65	61.5101	1162.2	41.4365
	1196.65	61.6943	1157.89	41.4365
	1196.65	61.8785	1157.89	41.6206
	1196.65	62.0626	1153.59	41.6206
	1196.65	62.2468	1149.28	41.6206
	1196.65	62.4309	1144.98	41.4365
	1196.65	62.6151	1144.98	41.2523
	1196.65	62.7993	1144.98	41.0681
	1196.65	62.9834	1144.98	40.884
	1196.65	63.3517	1144.98	40.6998
	1196.65	63.5359	1144.98	40.5157
	1196.65	63.1676	1140.67	40.3315
	1196.65	63.7201	1140.67	40.1473
	1196.65	63.9042	1140.67	39.9632
	1196.65	64.0884	1140.67	39.779
	1196.65	64.2726	1140.67	39.4107
	1196.65	64.4567	1140.67	39.5948
	1196.65	64.6409	1140.67	39.2265
	1196.65	64.825	1140.67	39.0424
	1196.65	65.0092	1140.67	38.8582
	1196.65	65.1934	1140.67	38.674
	1196.65	65.3775	1140.67	38.4899
	1196.65	65.5617	1140.67	38.1215
	1196.65	65.7459	1140.67	37.9374
	1196.65	65.93	1140.67	38.3057
	1196.65	66.1142	1140.67	37.7532
	1196.65	66.2983	1140.67	37.5691
	1196.65	66.4825	1140.67	37.3849
	1196.65	66.6667	1140.67	37.2007
	1196.65	66.8508	1140.67	37.0166
	1196.65	67.035	1140.67	36.8324
	1196.65	67.2192	1140.67	36.6483
	1196.65	67.4033	1140.67	36.4641
	1196.65	67.5875	1140.67	36.2799
	1196.65	67.7716	1140.67	36.0958
	1196.65	67.9558	1140.67	35.9116
	1196.65	68.14	1140.67	35.7274
	1196.65	68.3241	1140.67	35.5433
	1196.65	68.6924	1136.36	35.3591
	1196.65	68.5083	1136.36	35.175
	1196.65	68.8766	1136.36	34.9908
	1196.65	69.0608	1136.36	34.8066
	1196.65	69.2449	1136.36	34.6225
	1196.65	69.4291	1136.36	34.4383
	1196.65	69.6133	1136.36	34.2541
	1196.65	69.7974	1136.36	34.07
	1196.65	69.9816	1136.36	33.8858
	1196.65	70.1657	1136.36	33.7017
	1196.65	70.3499	1136.36	33.5175
	1196.65	70.5341	1136.36	33.3333
	1196.65	70.7182	1136.36	33.1492
	1196.65	70.9024	1136.36	32.965
	1196.65	71.0866	1136.36	32.7808
	1196.65	71.2707	1132.06	32.7808
	1196.65	71.4549	1132.06	32.5967
	1196.65	71.639	1127.75	32.5967
	1196.65	71.8232	1127.75	32.7808
	1196.65	72.1915	1123.44	32.7808
	1196.65	72.3757	1119.14	32.7808
	1196.65	72.0074	1119.14	32.5967
	1196.65	72.5599	1119.14	32.4125
	1196.65	72.744	1119.14	32.2284
	1196.65	72.9282	1119.14	32.0442
	1192.34	73.2965	1119.14	31.86
	1192.34	73.6648	1119.14	31.6759
	1192.34	73.849	1119.14	31.4917
	1192.34	74.2173	1119.14	31.3076
	1192.34	74.0331	1119.14	31.1234
	1192.34	73.4807	1119.14	30.9392
	1192.34	74.4015	1119.14	30.5709
	1192.34	74.5856	1119.14	30.7551
	1192.34	74.7698	1119.14	30.3867
	1192.34	74.954	1119.14	30.2026
	1192.34	75.1381	1119.14	30.0184
	1192.34	75.5064	1119.14	29.8343
	1192.34	75.3223	1119.14	29.6501
	1192.34	75.6906	1119.14	29.4659
	1192.34	75.8748	1119.14	29.2818
	1192.34	76.0589	1119.14	29.0976
	1192.34	76.2431	1119.14	28.9134
	1192.34	76.4273	1119.14	28.7293
	1192.34	76.7956	1119.14	28.5451
	1192.34	76.6114	1119.14	28.361
	1192.34	76.9797	1119.14	28.1768
	1192.34	77.1639	1119.14	27.9926
	1192.34	77.3481	1119.14	27.8085
	1188.04	77.5322	1119.14	27.6243
	1188.04	77.7164	1119.14	27.4401
	1188.04	77.9006	1119.14	27.256
	1188.04	78.0847	1114.83	27.256
	1188.04	78.2689	1114.83	27.0718
	1188.04	78.453	1114.83	26.8877
	1188.04	78.6372	1114.83	26.7035
	1188.04	78.8214	1114.83	26.3352
	1188.04	79.0055	1114.83	26.5193
	1188.04	79.1897	1114.83	26.151
	1188.04	79.3738	1110.53	26.151
	1188.04	79.558	1110.53	26.3352
	1188.04	79.7422	1106.22	26.3352
	1188.04	79.9263	1106.22	26.5193
	1188.04	80.1105	1106.22	26.7035
	1188.04	80.2947	1106.22	26.8877
	1188.04	80.4788	1106.22	27.0718
	1188.04	80.663	1106.22	27.256
	1188.04	80.8471	1106.22	27.4401
	1183.73	81.0313	1106.22	27.6243
	1183.73	81.2155	1106.22	27.8085
	1183.73	81.3996	1106.22	27.9926
	1183.73	81.5838	1106.22	28.361
	1183.73	81.768	1106.22	28.1768
	1183.73	81.9521	1106.22	28.5451
	1183.73	82.1363	1106.22	28.7293
	1183.73	82.3204	1106.22	28.9134
	1183.73	82.5046	1106.22	29.0976
	1183.73	82.6888	1106.22	29.2818
	1183.73	83.0571	1106.22	29.4659
	1183.73	82.8729	1106.22	29.6501
	1183.73	83.2413	1106.22	29.8343
	1183.73	83.4254	1106.22	30.0184
	1183.73	83.6096	1106.22	30.2026
	1179.43	83.9779	1106.22	30.3867
	1179.43	84.1621	1106.22	30.7551
	1179.43	84.3462	1106.22	30.5709
	1175.12	84.3462	1106.22	30.9392
	1170.81	84.3462	1106.22	31.1234
	1166.51	84.3462	1106.22	31.3076
	1166.51	84.5304	1106.22	31.4917
	1166.51	84.7145	1106.22	31.6759
	1166.51	84.8987	1106.22	32.0442
	1166.51	85.0829	1106.22	31.86
	1166.51	85.267	1106.22	32.2284
	1166.51	85.4512	1106.22	32.4125
	1166.51	85.6354	1106.22	32.5967
	1162.2	85.6354	1106.22	32.7808
	1162.2	85.8195	1106.22	32.965
	1162.2	86.0037	1106.22	33.1492
	1162.2	86.1878	1106.22	33.3333
	1157.89	86.1878	1106.22	33.5175
	1157.89	86.372	1106.22	33.7017
	1153.59	86.372	1106.22	34.07
	1149.28	86.372	1106.22	34.2541
	1144.98	86.1878	1106.22	33.8858
	1144.98	86.0037	1106.22	34.6225
	1144.98	85.8195	1106.22	34.4383
	1144.98	85.6354	1106.22	34.8066
	1140.67	85.4512	1106.22	34.9908
	1140.67	85.267	1106.22	35.175
	1140.67	85.0829	1106.22	35.3591
	1140.67	84.8987	1106.22	35.5433
	1140.67	84.7145	1106.22	35.7274
	1140.67	84.5304	1106.22	35.9116
	1140.67	84.3462	1106.22	36.0958
	1140.67	84.1621	1106.22	36.2799
	1140.67	83.9779	1106.22	36.4641
	1140.67	83.7937	1106.22	36.6483
	1140.67	83.6096	1106.22	36.8324
	1140.67	83.4254	1106.22	37.0166
	1140.67	83.2413	1101.91	37.2007
	1140.67	83.0571	1097.61	37.2007
	1140.67	82.8729	1097.61	37.3849
	1140.67	82.6888	1097.61	37.9374
	1140.67	82.5046	1097.61	38.1215
	1140.67	82.3204	1097.61	37.5691
	1140.67	82.1363	1097.61	37.7532
	1140.67	81.9521	1097.61	38.3057
	1140.67	81.768	1097.61	38.4899
	1140.67	81.5838	1097.61	38.674
	1140.67	81.3996	1097.61	38.8582
	1140.67	81.2155	1097.61	39.0424
	1140.67	81.0313	1097.61	39.2265
	1140.67	80.8471	1097.61	39.4107
	1140.67	80.663	1097.61	39.5948
	1140.67	80.4788	1097.61	39.779
	1140.67	80.2947	1097.61	39.9632
	1140.67	80.1105	1097.61	40.1473
	1140.67	79.9263	1097.61	40.3315
	1140.67	79.7422	1097.61	40.5157
	1140.67	79.558	1097.61	40.6998
	1140.67	79.1897	1097.61	40.884
	1140.67	79.3738	1093.3	41.0681
	1140.67	79.0055	1089	41.0681
	1140.67	78.8214	1084.69	41.0681
	1140.67	78.6372	1080.38	40.884
	1140.67	78.453	1076.08	40.6998
	1140.67	78.2689	1076.08	40.5157
	1140.67	77.9006	1076.08	40.3315
	1140.67	78.0847	1076.08	39.9632
	1140.67	77.7164	1076.08	39.779
	1140.67	77.3481	1076.08	40.1473
	1140.67	77.5322	1076.08	39.5948
	1140.67	77.1639	1076.08	39.4107
	1136.36	76.9797	1076.08	39.2265
	1136.36	76.7956	1076.08	39.0424
	1136.36	76.6114	1076.08	38.8582
	1136.36	76.4273	1076.08	38.674
	1136.36	76.2431	1076.08	38.4899
	1136.36	76.0589	1076.08	38.3057
	1136.36	75.8748	1076.08	38.1215
	1136.36	75.6906	1076.08	37.9374
	1136.36	75.5064	1076.08	37.7532
	1136.36	75.3223	1076.08	37.5691
	1136.36	75.1381	1076.08	37.2007
	1136.36	74.954	1076.08	37.3849
	1136.36	74.7698	1076.08	37.0166
	1136.36	74.5856	1076.08	36.8324
	1136.36	74.4015	1076.08	36.6483
	1136.36	74.2173	1076.08	36.4641
	1132.06	74.0331	1076.08	36.2799
	1127.75	74.0331	1076.08	35.9116
	1127.75	74.2173	1076.08	36.0958
	1127.75	74.4015	1076.08	35.5433
	1127.75	74.5856	1076.08	35.7274
	1127.75	74.7698	1076.08	35.3591
	1127.75	74.954	1076.08	34.9908
	1127.75	75.1381	1076.08	35.175
	1127.75	75.3223	1076.08	34.8066
	1127.75	75.5064	1076.08	34.6225
	1127.75	75.8748	1076.08	34.4383
	1127.75	75.6906	1076.08	34.2541
	1127.75	76.0589	1076.08	34.07
	1127.75	76.2431	1076.08	33.8858
	1127.75	76.4273	1076.08	33.7017
	1127.75	76.6114	1071.77	33.5175
	1127.75	76.7956	1071.77	33.3333
	1127.75	76.9797	1071.77	33.1492
	1127.75	77.1639	1071.77	32.965
	1127.75	77.3481	1071.77	32.7808
	1127.75	77.5322	1071.77	32.5967
	1127.75	77.9006	1071.77	32.4125
	1127.75	78.0847	1071.77	32.2284
	1127.75	77.7164	1071.77	32.0442
	1127.75	78.2689	1071.77	31.86
	1127.75	78.453	1071.77	31.6759
	1127.75	78.6372	1071.77	31.4917
	1127.75	78.8214	1071.77	31.3076
	1127.75	79.0055	1071.77	31.1234
	1127.75	79.1897	1071.77	30.7551
	1127.75	79.3738	1071.77	30.9392
	1123.44	79.558	1071.77	30.5709
	1119.14	79.558	1067.46	30.3867
	1119.14	79.3738	1063.16	30.3867
	1119.14	79.1897	1063.16	30.5709
	1119.14	79.0055	1063.16	30.7551
	1119.14	78.8214	1063.16	30.9392
	1119.14	78.453	1063.16	31.1234
	1119.14	78.2689	1063.16	31.3076
	1119.14	78.6372	1063.16	31.4917
	1119.14	78.0847	1063.16	31.6759
	1119.14	77.9006	1063.16	31.86
	1119.14	77.7164	1063.16	32.0442
	1119.14	77.5322	1063.16	32.2284
	1119.14	77.3481	1063.16	32.4125
	1119.14	77.1639	1063.16	32.5967
	1119.14	76.9797	1063.16	32.7808
	1119.14	76.7956	1063.16	32.965
	1119.14	76.6114	1063.16	33.1492
	1119.14	76.4273	1063.16	33.3333
	1119.14	76.2431	1063.16	33.5175
	1119.14	76.0589	1063.16	33.7017
	1119.14	75.8748	1063.16	33.8858
	1119.14	75.6906	1063.16	34.07
	1119.14	75.5064	1063.16	34.4383
	1119.14	75.3223	1063.16	34.2541
	1119.14	75.1381	1063.16	34.6225
	1119.14	74.954	1063.16	34.8066
	1119.14	74.7698	1063.16	34.9908
	1119.14	74.5856	1063.16	35.175
	1119.14	74.4015	1063.16	35.3591
	1119.14	74.2173	1063.16	35.5433
	1119.14	74.0331	1063.16	35.7274
	1119.14	73.849	1063.16	35.9116
	1119.14	73.6648	1063.16	36.0958
	1119.14	73.4807	1063.16	36.2799
	1119.14	73.2965	1063.16	36.4641
	1119.14	73.1123	1063.16	36.6483
	1119.14	72.744	1063.16	36.8324
	1119.14	72.9282	1063.16	37.0166
	1119.14	72.5599	1063.16	37.2007
	1119.14	72.3757	1058.85	37.3849
	1119.14	72.1915	1058.85	37.5691
	1119.14	71.8232	1058.85	37.7532
	1119.14	72.0074	1058.85	37.9374
	1119.14	71.639	1058.85	38.1215
	1119.14	71.4549	1058.85	38.3057
	1119.14	71.2707	1058.85	38.4899
	1119.14	71.0866	1058.85	38.674
	1119.14	70.9024	1058.85	38.8582
	1119.14	70.7182	1058.85	39.0424
	1119.14	70.5341	1058.85	39.2265
	1119.14	70.3499	1058.85	39.4107
	1119.14	70.1657	1058.85	39.5948
	1119.14	69.9816	1058.85	39.779
	1119.14	69.7974	1058.85	39.9632
	1119.14	69.6133	1054.55	40.1473
	1119.14	69.4291	1054.55	40.3315
	1119.14	69.2449	1054.55	40.5157
	1119.14	69.0608	1054.55	40.6998
	1119.14	68.6924	1054.55	40.884
	1119.14	68.8766	1054.55	41.0681
	1119.14	68.5083	1050.24	41.0681
	1119.14	68.3241	1045.93	41.0681
	1119.14	68.14	1045.93	40.884
	1119.14	67.9558	1045.93	40.6998
	1119.14	67.7716	1045.93	40.5157
	1119.14	67.5875	1045.93	40.3315
	1119.14	67.4033	1045.93	40.1473
	1119.14	67.2192	1041.63	40.1473
	1119.14	67.035	1037.32	40.1473
	1119.14	66.8508	1033.01	40.1473
	1119.14	66.6667	1033.01	40.3315
	1119.14	66.4825	1033.01	40.5157
	1119.14	66.2983	1033.01	40.6998
	1119.14	66.1142	1033.01	40.884
	1119.14	65.93	1033.01	41.0681
	1119.14	65.7459	1033.01	41.2523
	1114.83	65.7459	1033.01	41.4365
	1114.83	65.5617	1033.01	41.6206
	1114.83	65.3775	1033.01	41.8048
	1114.83	65.1934	1028.71	41.8048
	1114.83	65.0092	1028.71	41.989
	1114.83	64.6409	1028.71	42.3573
	1114.83	64.825	1028.71	42.1731
	1114.83	64.4567	1028.71	42.5414
	1110.53	64.4567	1024.4	42.5414
	1106.22	64.4567	1024.4	42.7256
	1106.22	64.6409	1024.4	42.9098
	1106.22	64.825	1020.1	42.9098
	1106.22	65.0092	1015.79	42.9098
	1106.22	65.1934	1015.79	43.0939
	1106.22	65.5617	1011.48	43.0939
	1106.22	65.3775	1007.18	43.0939
	1106.22	65.7459	1002.87	43.0939
	1106.22	65.93	998.565	43.0939
	1106.22	66.1142	994.258	43.0939
	1106.22	66.4825	989.952	43.0939
	1106.22	66.2983	985.646	43.0939
	1106.22	66.6667	981.34	42.9098
	1106.22	66.8508	977.033	42.7256
	1106.22	67.035	977.033	42.5414
	1106.22	67.2192	977.033	42.3573
	1106.22	67.4033	977.033	42.1731
	1106.22	67.5875	977.033	41.989
	1106.22	67.9558	977.033	41.8048
	1106.22	68.14	977.033	41.6206
	1106.22	67.7716	977.033	41.4365
	1106.22	68.3241	977.033	41.2523
	1106.22	68.5083	977.033	40.884
	1106.22	68.6924	977.033	41.0681
	1106.22	68.8766	977.033	40.6998
	1106.22	69.2449	977.033	40.5157
	1106.22	69.4291	977.033	40.3315
	1106.22	69.0608	977.033	40.1473
	1106.22	69.6133	977.033	39.9632
	1106.22	69.7974	977.033	39.779
	1106.22	69.9816	977.033	39.5948
	1106.22	70.3499	977.033	39.4107
	1106.22	70.5341	977.033	39.2265
	1106.22	70.1657	977.033	39.0424
	1106.22	70.7182	977.033	38.8582
	1106.22	70.9024	972.727	38.8582
	1106.22	71.0866	968.421	38.8582
	1106.22	71.2707	968.421	39.0424
	1106.22	71.4549	968.421	39.2265
	1106.22	71.8232	968.421	39.4107
	1106.22	71.639	968.421	39.5948
	1106.22	72.0074	968.421	39.779
	1106.22	72.1915	968.421	39.9632
	1106.22	72.3757	968.421	40.1473
	1106.22	72.5599	968.421	40.3315
	1106.22	72.744	968.421	40.5157
	1106.22	72.9282	968.421	40.6998
	1106.22	73.1123	968.421	40.884
	1106.22	73.2965	968.421	41.0681
	1106.22	73.4807	968.421	41.2523
	1106.22	73.6648	968.421	41.4365
	1106.22	74.0331	968.421	41.6206
	1106.22	73.849	968.421	41.8048
	1106.22	74.2173	968.421	41.989
	1106.22	74.5856	968.421	42.1731
	1106.22	74.4015	968.421	42.3573
	1106.22	74.7698	964.115	42.3573
	1106.22	74.954	964.115	42.5414
	1106.22	75.1381	964.115	42.7256
	1106.22	75.3223	964.115	42.9098
	1106.22	75.5064	964.115	43.0939
	1106.22	75.6906	959.809	43.0939
	1106.22	75.8748	959.809	43.2781
	1106.22	76.0589	955.502	43.2781
	1106.22	76.2431	951.196	43.2781
	1106.22	76.4273	946.89	43.2781
	1106.22	76.7956	942.584	43.2781
	1106.22	76.6114	938.278	43.2781
	1106.22	76.9797	933.971	43.2781
	1106.22	77.1639	925.359	43.2781
	1106.22	77.3481	929.665	43.2781
	1106.22	77.7164	921.053	43.2781
	1106.22	77.5322	916.746	43.2781
	1106.22	77.9006	912.44	43.2781
	1106.22	78.0847	908.134	43.2781
	1106.22	78.2689	903.828	43.2781
	1106.22	78.6372	899.522	43.2781
	1106.22	78.8214	895.215	43.2781
	1106.22	78.453	890.909	43.2781
	1106.22	79.0055	886.603	43.4622
	1106.22	79.1897	882.297	43.4622
	1106.22	79.3738	877.99	43.4622
	1106.22	79.7422	873.684	43.4622
	1106.22	79.558	869.378	43.4622
	1106.22	79.9263	865.072	43.4622
	1106.22	80.1105	860.766	43.4622
	1106.22	80.2947	856.459	43.2781
	1106.22	80.4788	852.153	43.0939
	1106.22	80.663	847.847	43.0939
	1106.22	80.8471	843.541	42.9098
	1106.22	81.0313	843.541	42.7256
	1106.22	81.2155	839.234	42.3573
	1106.22	81.3996	839.234	42.1731
	1106.22	81.5838	839.234	41.989
	1106.22	81.768	839.234	41.8048
	1106.22	81.9521	839.234	41.6206
	1106.22	82.1363	839.234	41.4365
	1106.22	82.3204	839.234	41.2523
	1106.22	82.5046	839.234	41.0681
	1101.91	82.6888	839.234	40.884
	1101.91	82.8729	839.234	40.6998
	1101.91	83.0571	839.234	40.5157
	1101.91	83.2413	839.234	40.3315
	1101.91	83.4254	839.234	40.1473
	1101.91	83.6096	839.234	39.779
	1101.91	83.7937	839.234	39.5948
	1101.91	83.9779	839.234	39.2265
	1101.91	84.1621	839.234	39.0424
	1101.91	84.3462	839.234	39.4107
	1101.91	84.5304	839.234	38.4899
	1101.91	84.7145	839.234	39.9632
	1097.61	84.8987	839.234	38.674
	1097.61	85.0829	839.234	38.8582
	1097.61	85.267	839.234	38.3057
	1097.61	85.4512	839.234	38.1215
	1093.3	85.4512	839.234	37.9374
	1093.3	85.6354	839.234	37.5691
	1089	85.6354	839.234	37.7532
	1084.69	85.6354	839.234	37.3849
	1080.38	85.6354	834.928	37.2007
	1080.38	85.4512	834.928	37.0166
	1080.38	85.267	834.928	36.8324
	1080.38	85.0829	834.928	36.6483
	1080.38	84.8987	834.928	36.4641
	1076.08	84.7145	830.622	36.4641
	1076.08	84.5304	826.316	36.4641
	1076.08	84.3462	826.316	36.8324
	1076.08	84.1621	826.316	36.6483
	1076.08	83.9779	826.316	37.0166
	1076.08	83.7937	826.316	37.2007
	1076.08	83.6096	826.316	37.3849
	1076.08	83.4254	826.316	37.5691
	1076.08	83.2413	826.316	37.9374
	1076.08	83.0571	826.316	37.7532
	1076.08	82.8729	826.316	38.1215
	1076.08	82.6888	826.316	38.4899
	1076.08	82.5046	826.316	38.3057
	1076.08	82.3204	826.316	38.674
	1076.08	82.1363	826.316	38.8582
	1076.08	81.9521	826.316	39.0424
	1076.08	81.768	826.316	39.2265
	1076.08	81.5838	826.316	39.4107
	1076.08	81.3996	826.316	39.5948
	1076.08	81.2155	822.01	39.5948
	1076.08	81.0313	817.703	39.5948
	1076.08	80.8471	817.703	39.4107
	1076.08	80.663	817.703	39.0424
	1076.08	80.4788	817.703	39.2265
	1076.08	80.2947	817.703	38.8582
	1076.08	80.1105	817.703	38.674
	1076.08	79.9263	817.703	38.3057
	1076.08	79.7422	817.703	38.4899
	1076.08	79.558	817.703	38.1215
	1076.08	79.1897	817.703	37.7532
	1076.08	79.3738	817.703	37.9374
	1076.08	79.0055	817.703	37.5691
	1076.08	78.6372	817.703	37.3849
	1076.08	78.8214	817.703	37.2007
	1076.08	78.453	813.397	37.2007
	1076.08	78.2689	809.091	37.2007
	1076.08	78.0847	809.091	37.5691
	1076.08	77.9006	809.091	37.3849
	1076.08	77.7164	809.091	37.7532
	1076.08	77.5322	809.091	37.9374
	1076.08	77.1639	809.091	38.3057
	1076.08	77.3481	809.091	38.1215
	1076.08	76.7956	809.091	38.674
	1076.08	76.9797	809.091	38.4899
	1076.08	76.6114	809.091	38.8582
	1076.08	76.4273	804.785	38.8582
	1076.08	76.2431	800.478	38.8582
	1076.08	76.0589	796.172	38.674
	1076.08	75.8748	796.172	38.3057
	1076.08	75.6906	796.172	38.1215
	1076.08	75.3223	796.172	37.9374
	1076.08	75.5064	796.172	37.7532
	1076.08	75.1381	796.172	37.5691
	1076.08	74.954	796.172	37.2007
	1076.08	74.7698	796.172	37.3849
	1076.08	74.5856	796.172	37.0166
	1076.08	74.4015	796.172	36.6483
	1076.08	74.2173	796.172	36.8324
	1076.08	74.0331	796.172	36.4641
	1071.77	74.0331	796.172	36.2799
	1071.77	73.849	796.172	36.0958
	1071.77	73.6648	796.172	35.9116
	1071.77	73.4807	796.172	35.7274
	1071.77	73.2965	796.172	35.5433
	1071.77	73.1123	796.172	35.3591
	1071.77	72.9282	796.172	35.175
	1071.77	72.744	796.172	34.9908
	1071.77	72.5599	796.172	34.8066
	1071.77	72.3757	787.56	34.8066
	1071.77	72.1915	787.56	34.9908
	1071.77	72.0074	787.56	35.175
	1071.77	71.8232	787.56	35.3591
	1071.77	71.639	787.56	35.5433
	1071.77	71.4549	783.254	35.7274
	1071.77	71.2707	783.254	36.0958
	1071.77	71.0866	783.254	35.9116
	1071.77	70.9024	783.254	36.2799
	1071.77	70.7182	783.254	36.6483
	1067.46	70.7182	783.254	36.4641
	1063.16	70.7182	783.254	36.8324
	1063.16	71.0866	783.254	37.0166
	1063.16	70.9024	783.254	37.2007
	1063.16	71.2707	783.254	37.3849
	1063.16	71.4549	783.254	37.7532
	1063.16	71.639	783.254	37.5691
	1063.16	71.8232	783.254	37.9374
	1063.16	72.0074	783.254	38.1215
	1063.16	72.1915	783.254	38.3057
	1063.16	72.3757	783.254	38.4899
	1063.16	72.5599	783.254	38.674
	1063.16	72.744	783.254	38.8582
	1063.16	72.9282	783.254	39.0424
	1063.16	73.1123	783.254	39.2265
	1063.16	73.2965	783.254	39.4107
	1063.16	73.4807	783.254	39.5948
	1058.85	73.4807	783.254	39.779
	1058.85	73.6648	783.254	39.9632
	1058.85	73.849	783.254	40.1473
	1058.85	74.0331	783.254	40.3315
	1058.85	74.2173	783.254	40.5157
	1058.85	74.5856	778.947	40.884
	1058.85	74.4015	778.947	41.0681
	1058.85	74.7698	778.947	41.2523
	1058.85	74.954	778.947	41.4365
	1058.85	75.1381	774.641	41.6206
	1058.85	75.5064	770.335	41.8048
	1058.85	75.3223	766.029	41.989
	1058.85	75.6906	766.029	42.1731
	1058.85	75.8748	766.029	42.3573
	1058.85	76.0589	761.722	42.5414
	1058.85	76.2431	757.416	42.5414
	1058.85	76.4273	753.11	42.5414
	1058.85	76.6114	748.804	42.5414
	1058.85	76.7956	748.804	42.7256
	1058.85	76.9797	748.804	42.9098
	1058.85	77.1639	748.804	43.0939
	1058.85	77.3481	744.498	43.2781
	1058.85	77.5322	740.191	43.2781
	1058.85	77.7164	735.885	43.2781
	1058.85	78.0847	731.579	43.2781
	1058.85	77.9006	727.273	43.2781
	1058.85	78.2689	722.967	43.2781
	1058.85	78.453	722.967	43.0939
	1058.85	78.6372	722.967	42.9098
	1058.85	78.8214	718.66	42.9098
	1058.85	79.0055	714.354	42.9098
	1058.85	79.1897	710.048	42.9098
	1054.55	79.1897	705.742	42.9098
	1054.55	79.3738	705.742	42.7256
	1054.55	79.558	705.742	42.5414
	1054.55	79.7422	701.435	42.3573
	1054.55	79.9263	701.435	42.1731
	1054.55	80.1105	701.435	41.989
	1054.55	80.2947	701.435	41.8048
	1054.55	80.4788	701.435	41.6206
	1054.55	80.663	701.435	41.4365
	1054.55	80.8471	697.129	41.4365
	1054.55	81.0313	692.823	41.4365
	1054.55	81.2155	688.517	41.4365
	1054.55	81.3996	684.211	41.4365
	1054.55	81.768	679.904	41.4365
	1054.55	81.5838	675.598	41.4365
	1054.55	81.9521	675.598	41.2523
	1054.55	82.1363	675.598	41.0681
	1054.55	82.5046	675.598	40.884
	1054.55	82.3204	675.598	40.6998
	1054.55	82.6888	675.598	40.5157
	1054.55	82.8729	675.598	40.1473
	1054.55	83.0571	675.598	40.3315
	1054.55	83.2413	675.598	39.9632
	1054.55	83.4254	675.598	39.779
	1054.55	83.6096	675.598	39.5948
	1054.55	83.7937	675.598	39.4107
	1054.55	83.9779	675.598	39.2265
	1054.55	84.1621	671.292	39.2265
	1054.55	84.3462	666.986	39.2265
	1054.55	84.5304	666.986	39.4107
	1054.55	84.7145	666.986	39.5948
	1054.55	84.8987	666.986	39.779
	1054.55	85.0829	666.986	39.9632
	1054.55	85.267	666.986	40.1473
	1054.55	85.4512	666.986	40.3315
	1050.24	85.4512	666.986	40.5157
	1045.93	85.4512	666.986	40.6998
	1045.93	85.267	666.986	41.0681
	1045.93	85.0829	666.986	41.2523
	1045.93	84.8987	666.986	40.884
	1045.93	84.7145	666.986	41.4365
	1045.93	84.5304	662.679	41.4365
	1045.93	84.3462	658.373	41.4365
	1045.93	84.1621	654.067	41.4365
	1045.93	83.9779	654.067	41.2523
	1045.93	83.7937	654.067	41.0681
	1045.93	83.6096	654.067	40.884
	1045.93	83.4254	654.067	40.6998
	1045.93	83.2413	654.067	40.5157
	1045.93	83.0571	654.067	40.3315
	1041.63	83.0571	654.067	40.1473
	1037.32	83.0571	654.067	39.9632
	1037.32	83.2413	654.067	39.779
	1037.32	83.4254	654.067	39.5948
	1037.32	83.6096	654.067	39.4107
	1033.01	83.6096	654.067	39.2265
	1033.01	83.7937	654.067	39.0424
	1033.01	83.9779	654.067	38.8582
	1033.01	84.1621	654.067	38.674
	1028.71	84.1621	654.067	38.4899
	1028.71	84.3462	654.067	38.3057
	1028.71	84.5304	654.067	38.1215
	1028.71	84.7145	654.067	37.9374
	1028.71	84.8987	654.067	37.7532
	1028.71	85.0829	654.067	37.5691
	1028.71	85.267	649.761	37.5691
	1028.71	85.4512	649.761	37.3849
	1028.71	85.6354	645.455	37.3849
	1028.71	85.8195	645.455	37.5691
	1028.71	86.0037	641.148	37.5691
	1028.71	86.1878	641.148	37.7532
	1028.71	86.5562	641.148	38.1215
	1028.71	86.372	641.148	38.4899
	1028.71	86.7403	641.148	37.9374
	1028.71	86.9245	641.148	38.3057
	1028.71	87.1087	641.148	38.674
	1028.71	87.2928	641.148	38.8582
	1028.71	87.477	641.148	39.0424
	1024.4	87.6611	641.148	39.2265
	1020.1	87.8453	641.148	39.4107
	1015.79	88.0295	641.148	39.5948
	1011.48	88.2136	641.148	39.779
	1007.18	88.2136	641.148	39.9632
	1002.87	88.2136	641.148	40.1473
	998.565	88.2136	641.148	40.3315
	994.258	88.2136	641.148	40.5157
	989.952	88.2136	641.148	40.6998
	985.646	88.0295	636.842	40.884
	981.34	87.8453	636.842	41.0681
	981.34	87.6611	636.842	41.2523
	981.34	87.477	636.842	41.4365
	981.34	87.2928	636.842	41.6206
	981.34	87.1087	636.842	41.8048
	981.34	86.9245	632.536	41.989
	981.34	86.7403	628.23	41.989
	981.34	86.5562	623.923	41.989
	981.34	86.372	623.923	41.8048
	981.34	86.1878	623.923	41.6206
	981.34	86.0037	623.923	41.4365
	981.34	85.8195	619.617	41.4365
	981.34	85.6354	615.311	41.4365
	981.34	85.4512	611.005	41.6206
	981.34	85.267	611.005	41.8048
	981.34	85.0829	611.005	41.989
	981.34	84.8987	611.005	42.3573
	981.34	84.7145	606.699	42.3573
	981.34	84.5304	606.699	42.5414
	981.34	84.1621	602.392	42.5414
	981.34	83.9779	598.086	42.5414
	981.34	84.3462	593.78	42.5414
	981.34	83.7937	589.474	42.3573
	977.033	83.7937	589.474	42.1731
	977.033	83.6096	589.474	41.989
	977.033	83.4254	589.474	41.8048
	977.033	83.2413	589.474	41.6206
	977.033	83.0571	589.474	41.4365
	977.033	82.8729	589.474	41.0681
	977.033	82.6888	589.474	41.2523
	972.727	82.6888	589.474	40.884
	968.421	82.6888	580.861	41.0681
	968.421	82.8729	580.861	41.2523
	968.421	83.0571	580.861	41.4365
	968.421	83.2413	580.861	41.6206
	968.421	83.4254	580.861	41.8048
	968.421	83.6096	580.861	41.989
	968.421	83.7937	580.861	42.1731
	968.421	83.9779	576.555	42.3573
	968.421	84.1621	576.555	42.5414
[truncated: 729 more rows]

## Sheet: XRDmembrane
		5	1.96	1.7248
		5.02	4.84	4.2592
		5.04	5.76	5.0688
		5.06	4	3.52
		5.08	4.84	4.2592
		5.1	12.25	10.78
		5.12	7.84	6.8992
		5.14	1.96	1.7248
		5.16	5.76	5.0688
		5.18	2.89	2.5432
		5.2	10.24	9.0112
		5.22	2.89	2.5432
		5.24	4	3.52
		5.26	1.96	1.7248
		5.28	5.76	5.0688
		5.3	1.96	1.7248
		5.32	4	3.52
		5.34	1.96	1.7248
		5.36	5.76	5.0688
		5.38	1.96	1.7248
		5.4	2.89	2.5432
		5.42	2.89	2.5432
		5.44	4.84	4.2592
		5.46	2.89	2.5432
		5.48	4	3.52
		5.5	6.76	5.9488
		5.52	4	3.52
		5.54	7.84	6.8992
		5.56	4.84	4.2592
		5.58	1.96	1.7248
		5.6	1.96	1.7248
		5.62	4.84	4.2592
		5.64	5.76	5.0688
		5.66	4.84	4.2592
		5.68	2.89	2.5432
		5.7	4	3.52
		5.72	4	3.52
		5.74	4.84	4.2592
		5.76	2.89	2.5432
		5.78	7.84	6.8992
		5.8	4.84	4.2592
		5.82	4	3.52
		5.84	1	0.88
		5.86	1.96	1.7248
		5.88	7.84	6.8992
		5.9	1.96	1.7248
		5.92	4.84	4.2592
		5.94	4	3.52
		5.96	4	3.52
		5.98	4	3.52
		6	4	3.52
		6.02	2.89	2.5432
		6.04	4.84	4.2592
		6.06	2.89	2.5432
		6.08	4.84	4.2592
		6.1	2.89	2.5432
		6.12	4.84	4.2592
		6.14	7.84	6.8992
		6.16	12.25	10.78
		6.18	9	7.92
		6.2	1	0.88
		6.22	6.76	5.9488
		6.24	6.76	5.9488
		6.26	1.96	1.7248
		6.28	0	0
		6.3	2.89	2.5432
		6.32	6.76	5.9488
		6.34	4.84	4.2592
		6.36	2.89	2.5432
		6.38	4	3.52
		6.4	7.84	6.8992
		6.42	1.96	1.7248
		6.44	2.89	2.5432
		6.46	1.96	1.7248
		6.48	5.76	5.0688
		6.5	4	3.52
		6.52	1.96	1.7248
		6.54	2.89	2.5432
		6.56	4	3.52
		6.58	4	3.52
		6.6	0	0
		6.62	2.89	2.5432
		6.64	4	3.52
		6.66	6.76	5.9488
		6.68	4	3.52
		6.7	4	3.52
		6.72	4.84	4.2592
		6.74	2.89	2.5432
		6.76	4	3.52
		6.78	1.96	1.7248
		6.8	4	3.52
		6.82	2.89	2.5432
		6.84	2.89	2.5432
		6.86	4	3.52
		6.88	7.84	6.8992
		6.9	4	3.52
		6.92	1.96	1.7248
		6.94	2.89	2.5432
		6.96	7.84	6.8992
		6.98	4.84	4.2592
		7	4.84	4.2592
		7.02	2.89	2.5432
		7.04	6.76	5.9488
		7.06	4.84	4.2592
		7.08	2.89	2.5432
		7.1	5.76	5.0688
		7.12	5.76	5.0688
		7.14	2.89	2.5432
		7.16	1	0.88
		7.18	2.89	2.5432
		7.2	4.84	4.2592
		7.22	2.89	2.5432
		7.24	4	3.52
		7.26	4	3.52
		7.28	5.76	5.0688
		7.3	4	3.52
		7.32	5.76	5.0688
		7.34	1	0.88
		7.36	4	3.52
		7.38	2.89	2.5432
		7.4	2.89	2.5432
		7.42	4	3.52
		7.44	4.84	4.2592
		7.46	4.84	4.2592
		7.48	4.84	4.2592
		7.5	6.76	5.9488
		7.52	1.96	1.7248
		7.54	2.89	2.5432
		7.56	1	0.88
		7.58	1.96	1.7248
		7.6	4.84	4.2592
		7.62	10.89	9.5832
		7.64	4.84	4.2592
		7.66	4	3.52
		7.68	2.89	2.5432
		7.7	2.89	2.5432
		7.72	5.76	5.0688
		7.74	6.76	5.9488
		7.76	1.96	1.7248
		7.78	4.84	4.2592
		7.8	5.76	5.0688
		7.82	4.84	4.2592
		7.84	4.84	4.2592
		7.86	2.89	2.5432
		7.88	4	3.52
		7.9	4	3.52
		7.92	4.84	4.2592
		7.94	6.76	5.9488
		7.96	4	3.52
		7.98	2.89	2.5432
		8	9	7.92
		8.02	6.76	5.9488
		8.04	1.96	1.7248
		8.06	5.76	5.0688
		8.08	1.96	1.7248
		8.1	1	0.88
		8.12	7.84	6.8992
		8.14	5.76	5.0688
		8.16	6.76	5.9488
		8.18	2.89	2.5432
		8.2	1	0.88
		8.22	4	3.52
		8.24	2.89	2.5432
		8.26	2.89	2.5432
		8.28	2.89	2.5432
		8.3	6.76	5.9488
		8.32	5.76	5.0688
		8.34	4	3.52
		8.36	1.96	1.7248
		8.38	2.89	2.5432
		8.4	2.89	2.5432
		8.42	0	0
		8.44	4	3.52
		8.46	4.84	4.2592
		8.48	1.96	1.7248
		8.5	2.89	2.5432
		8.52	1.96	1.7248
		8.54	1.96	1.7248
		8.56	4	3.52
		8.58	4.84	4.2592
		8.6	1	0.88
		8.62	6.76	5.9488
		8.64	0	0
		8.66	0	0
		8.68	4.84	4.2592
		8.7	2.89	2.5432
		8.72	2.89	2.5432
		8.74	6.76	5.9488
		8.76	1.96	1.7248
		8.78	2.89	2.5432
		8.8	2.89	2.5432
		8.82	4	3.52
		8.84	4	3.52
		8.86	5.76	5.0688
		8.88	4	3.52
		8.9	1.96	1.7248
		8.92	1	0.88
		8.94	9	7.92
		8.96	4	3.52
		8.98	1.96	1.7248
		9	0	0
		9.02	5.76	5.0688
		9.04	6.76	5.9488
		9.06	4.84	4.2592
		9.08	4	3.52
		9.1	2.89	2.5432
		9.12	4.84	4.2592
		9.14	4	3.52
		9.16	5.76	5.0688
		9.18	1.96	1.7248
		9.2	2.89	2.5432
		9.22	1.96	1.7248
		9.24	1.96	1.7248
		9.26	4	3.52
		9.28	2.89	2.5432
		9.3	2.89	2.5432
		9.32	4.84	4.2592
		9.34	4.84	4.2592
		9.36	2.89	2.5432
		9.38	1.96	1.7248
		9.4	4.84	4.2592
		9.42	1.96	1.7248
		9.44	4.84	4.2592
		9.46	1	0.88
		9.48	0	0
		9.5	4.84	4.2592
		9.52	4	3.52
		9.54	4	3.52
		9.56	4	3.52
		9.58	1	0.88
		9.6	4.84	4.2592
		9.62	2.89	2.5432
		9.64	4.84	4.2592
		9.66	4	3.52
		9.68	4	3.52
		9.7	9	7.92
		9.72	2.89	2.5432
		9.74	2.89	2.5432
		9.76	4	3.52
		9.78	6.76	5.9488
		9.8	4	3.52
		9.82	2.89	2.5432
		9.84	6.76	5.9488
		9.86	4	3.52
		9.88	5.76	5.0688
		9.9	4	3.52
		9.92	4.84	4.2592
		9.94	1.96	1.7248
		9.96	6.76	5.9488
		9.98	2.89	2.5432
		10	5.76	5.0688
		10.02	6.76	5.9488
		10.04	1	0.88
		10.06	4	3.52
		10.08	2.89	2.5432
		10.1	1	0.88
		10.12	4.84	4.2592
		10.14	7.84	6.8992
		10.16	4	3.52
		10.18	1.96	1.7248
		10.2	2.89	2.5432
		10.22	2.89	2.5432
		10.24	5.76	5.0688
		10.26	4.84	4.2592
		10.28	2.89	2.5432
		10.3	2.89	2.5432
		10.32	4.84	4.2592
		10.34	1.96	1.7248
		10.36	4	3.52
		10.38	1.96	1.7248
		10.4	1.96	1.7248
		10.42	4	3.52
		10.44	4	3.52
		10.46	5.76	5.0688
		10.48	2.89	2.5432
		10.5	1.96	1.7248
		10.52	4.84	4.2592
		10.54	4	3.52
		10.56	2.89	2.5432
		10.58	2.89	2.5432
		10.6	4.84	4.2592
		10.62	9	7.92
		10.64	1	0.88
		10.66	4.84	4.2592
		10.68	1.96	1.7248
		10.7	5.76	5.0688
		10.72	4	3.52
		10.74	2.89	2.5432
		10.76	2.89	2.5432
		10.78	1	0.88
		10.8	5.76	5.0688
		10.82	2.89	2.5432
		10.84	4.84	4.2592
		10.86	4.84	4.2592
		10.88	4.84	4.2592
		10.9	0	0
		10.92	2.89	2.5432
		10.94	4.84	4.2592
		10.96	1.96	1.7248
		10.98	5.76	5.0688
		11	4	3.52
		11.02	7.84	6.8992
		11.04	4	3.52
		11.06	1	0.88
		11.08	2.89	2.5432
		11.1	1	0.88
		11.12	0	0
		11.14	2.89	2.5432
		11.16	4.84	4.2592
		11.18	4.84	4.2592
		11.2	1.96	1.7248
		11.22	4	3.52
		11.24	5.76	5.0688
		11.26	4	3.52
		11.28	4	3.52
		11.3	0	0
		11.32	1.96	1.7248
		11.34	2.89	2.5432
		11.36	4.84	4.2592
		11.38	5.76	5.0688
		11.4	4	3.52
		11.42	5.76	5.0688
		11.44	4.84	4.2592
		11.46	4	3.52
		11.48	2.89	2.5432
		11.5	2.89	2.5432
		11.52	5.76	5.0688
		11.54	4.84	4.2592
		11.56	2.89	2.5432
		11.58	4	3.52
		11.6	4	3.52
		11.62	4	3.52
		11.64	6.76	5.9488
		11.66	4.84	4.2592
		11.68	9	7.92
		11.7	5.76	5.0688
		11.72	1.96	1.7248
		11.74	2.89	2.5432
		11.76	6.76	5.9488
		11.78	4	3.52
		11.8	9	7.92
		11.82	4.84	4.2592
		11.84	4.84	4.2592
		11.86	4.84	4.2592
		11.88	5.76	5.0688
		11.9	4	3.52
		11.92	7.84	6.8992
		11.94	1.96	1.7248
		11.96	4.84	4.2592
		11.98	4	3.52
		12	1	0.88
		12.02	4	3.52
		12.04	4	3.52
		12.06	0	0
		12.08	1.96	1.7248
		12.1	4.84	4.2592
		12.12	2.89	2.5432
		12.14	6.76	5.9488
		12.16	2.89	2.5432
		12.18	2.89	2.5432
		12.2	4	3.52
		12.22	1	0.88
		12.24	4.84	4.2592
		12.26	5.76	5.0688
		12.28	0	0
		12.3	6.76	5.9488
		12.32	4	3.52
		12.34	1.96	1.7248
		12.36	4.84	4.2592
		12.38	0	0
		12.4	1	0.88
		12.42	2.89	2.5432
		12.44	2.89	2.5432
		12.46	4	3.52
		12.48	2.89	2.5432
		12.5	4	3.52
		12.52	4.84	4.2592
		12.54	2.89	2.5432
		12.56	4	3.52
		12.58	2.89	2.5432
		12.6	6.76	5.9488
		12.62	1.96	1.7248
		12.64	4.84	4.2592
		12.66	5.76	5.0688
		12.68	4.84	4.2592
		12.7	1.96	1.7248
		12.72	4	3.52
		12.74	2.89	2.5432
		12.76	2.89	2.5432
		12.78	2.89	2.5432
		12.8	4	3.52
		12.82	2.89	2.5432
		12.84	1.96	1.7248
		12.86	5.76	5.0688
		12.88	2.89	2.5432
		12.9	1	0.88
		12.92	2.89	2.5432
		12.94	4.84	4.2592
		12.96	5.76	5.0688
		12.98	2.89	2.5432
		13	2.89	2.5432
		13.02	2.89	2.5432
		13.04	4	3.52
		13.06	5.76	5.0688
		13.08	2.89	2.5432
		13.1	4.84	4.2592
		13.12	4	3.52
		13.14	4	3.52
		13.16	2.89	2.5432
		13.18	2.89	2.5432
		13.2	1.96	1.7248
		13.22	6.76	5.9488
		13.24	6.76	5.9488
		13.26	1.96	1.7248
		13.28	2.89	2.5432
		13.3	1	0.88
		13.32	4	3.52
		13.34	2.89	2.5432
		13.36	6.76	5.9488
		13.38	1	0.88
		13.4	0	0
		13.42	4	3.52
		13.44	4	3.52
		13.46	4.84	4.2592
		13.48	4.84	4.2592
		13.5	4	3.52
		13.52	2.89	2.5432
		13.54	4.84	4.2592
		13.56	1	0.88
		13.58	5.76	5.0688
		13.6	4	3.52
		13.62	2.89	2.5432
		13.64	2.89	2.5432
		13.66	4.84	4.2592
		13.68	5.76	5.0688
		13.7	4.84	4.2592
		13.72	1.96	1.7248
		13.74	5.76	5.0688
		13.76	1.96	1.7248
		13.78	6.76	5.9488
		13.8	1.96	1.7248
		13.82	2.89	2.5432
		13.84	4.84	4.2592
		13.86	4	3.52
		13.88	4	3.52
		13.9	4	3.52
		13.92	4	3.52
		13.94	5.76	5.0688
		13.96	4	3.52
		13.98	4	3.52
		14	2.89	2.5432
		14.02	2.89	2.5432
		14.04	1.96	1.7248
		14.06	4.84	4.2592
		14.08	7.84	6.8992
		14.1	5.76	5.0688
		14.12	6.76	5.9488
		14.14	4.84	4.2592
		14.16	2.89	2.5432
		14.18	1.96	1.7248
		14.2	1.96	1.7248
		14.22	4	3.52
		14.24	5.76	5.0688
		14.26	1.96	1.7248
		14.28	1.96	1.7248
		14.3	5.76	5.0688
		14.32	2.89	2.5432
		14.34	4.84	4.2592
		14.36	2.89	2.5432
		14.38	2.89	2.5432
		14.4	1.96	1.7248
		14.42	2.89	2.5432
		14.44	4.84	4.2592
		14.46	7.84	6.8992
		14.48	4.84	4.2592
		14.5	1	0.88
		14.52	4	3.52
		14.54	4	3.52
		14.56	7.84	6.8992
		14.58	1.96	1.7248
		14.6	4.84	4.2592
		14.62	1.96	1.7248
		14.64	4	3.52
		14.66	1	0.88
		14.68	4.84	4.2592
		14.7	1.96	1.7248
		14.72	2.89	2.5432
		14.74	4	3.52
		14.76	2.89	2.5432
		14.78	1.96	1.7248
		14.8	2.89	2.5432
		14.82	4.84	4.2592
		14.84	1.96	1.7248
		14.86	4.84	4.2592
		14.88	2.89	2.5432
		14.9	1.96	1.7248
		14.92	2.89	2.5432
		14.94	5.76	5.0688
		14.96	4	3.52
		14.98	1.96	1.7248
		15	4	3.52
		15.02	5.76	5.0688
		15.04	4	3.52
		15.06	5.76	5.0688
		15.08	2.89	2.5432
		15.1	2.89	2.5432
		15.12	4	3.52
		15.14	4	3.52
		15.16	5.76	5.0688
		15.18	7.84	6.8992
		15.2	6.76	5.9488
		15.22	4	3.52
		15.24	4	3.52
		15.26	4	3.52
		15.28	4.84	4.2592
		15.3	4	3.52
		15.32	5.76	5.0688
		15.34	7.84	6.8992
		15.36	5.76	5.0688
		15.38	2.89	2.5432
		15.4	5.76	5.0688
		15.42	2.89	2.5432
		15.44	4	3.52
		15.46	5.76	5.0688
		15.48	1	0.88
		15.5	4.84	4.2592
		15.52	6.76	5.9488
		15.54	5.76	5.0688
		15.56	4.84	4.2592
		15.58	4.84	4.2592
		15.6	5.76	5.0688
		15.62	4.84	4.2592
		15.64	6.76	5.9488
		15.66	2.89	2.5432
		15.68	1.96	1.7248
		15.7	4.84	4.2592
		15.72	4.84	4.2592
		15.74	5.76	5.0688
		15.76	5.76	5.0688
		15.78	1.96	1.7248
		15.8	2.89	2.5432
		15.82	2.89	2.5432
		15.84	2.89	2.5432
		15.86	5.76	5.0688
		15.88	2.89	2.5432
		15.9	4.84	4.2592
		15.92	5.76	5.0688
		15.94	4.84	4.2592
		15.96	5.76	5.0688
		15.98	4	3.52
		16	6.76	5.9488
		16.02	4	3.52
		16.04	6.76	5.9488
		16.06	2.89	2.5432
		16.08	4	3.52
		16.1	7.84	6.8992
		16.12	1.96	1.7248
		16.14	4	3.52
		16.16	4	3.52
		16.18	4	3.52
		16.2	4.84	4.2592
		16.22	10.24	9.0112
		16.24	4.84	4.2592
		16.26	4	3.52
		16.28	5.76	5.0688
		16.3	9	7.92
		16.32	2.89	2.5432
		16.34	2.89	2.5432
		16.36	0	0
		16.38	2.89	2.5432
		16.4	4	3.52
		16.42	4	3.52
		16.44	2.89	2.5432
		16.46	2.89	2.5432
		16.48	2.89	2.5432
		16.5	4	3.52
		16.52	0	0
		16.54	2.89	2.5432
		16.56	4.84	4.2592
		16.58	1.96	1.7248
		16.6	2.89	2.5432
		16.62	4.84	4.2592
		16.64	1	0.88
		16.66	6.76	5.9488
		16.68	6.76	5.9488
		16.7	4.84	4.2592
		16.72	4.84	4.2592
		16.74	1	0.88
		16.76	9	7.92
		16.78	2.89	2.5432
		16.8	1	0.88
		16.82	2.89	2.5432
		16.84	2.89	2.5432
		16.86	1	0.88
		16.88	2.89	2.5432
		16.9	1.96	1.7248
		16.92	1	0.88
		16.94	1.96	1.7248
		16.96	4	3.52
		16.98	2.89	2.5432
		17	2.89	2.5432
		17.02	2.89	2.5432
		17.04	1.96	1.7248
		17.06	2.89	2.5432
		17.08	1.96	1.7248
		17.1	5.76	5.0688
		17.12	1.96	1.7248
		17.14	2.89	2.5432
		17.16	1.96	1.7248
		17.18	4.84	4.2592
		17.2	2.89	2.5432
		17.22	6.76	5.9488
		17.24	2.89	2.5432
		17.26	4.84	4.2592
		17.28	5.76	5.0688
		17.3	1.96	1.7248
		17.32	6.76	5.9488
		17.34	4.84	4.2592
		17.36	1	0.88
		17.38	1.96	1.7248
		17.4	7.84	6.8992
		17.42	2.89	2.5432
		17.44	4	3.52
		17.46	2.89	2.5432
		17.48	6.76	5.9488
		17.5	4	3.52
		17.52	2.89	2.5432
		17.54	5.76	5.0688
		17.56	0	0
		17.58	7.84	6.8992
		17.6	4	3.52
		17.62	4	3.52
		17.64	2.89	2.5432
		17.66	2.89	2.5432
		17.68	2.89	2.5432
		17.7	7.84	6.8992
		17.72	2.89	2.5432
		17.74	4.84	4.2592
		17.76	4.84	4.2592
		17.78	2.89	2.5432
		17.8	1.96	1.7248
		17.82	4.84	4.2592
		17.84	4	3.52
		17.86	2.89	2.5432
		17.88	4.84	4.2592
		17.9	1	0.88
		17.92	1	0.88
		17.94	4.84	4.2592
		17.96	2.89	2.5432
		17.98	1.96	1.7248
		18	4	3.52
		18.02	7.84	6.8992
		18.04	4	3.52
		18.06	5.76	5.0688
		18.08	2.89	2.5432
		18.1	7.84	6.8992
		18.12	4	3.52
		18.14	5.76	5.0688
		18.16	10.24	9.0112
		18.18	6.76	5.9488
		18.2	5.76	5.0688
		18.22	5.76	5.0688
		18.24	2.89	2.5432
		18.26	6.76	5.9488
		18.28	9	7.92
		18.3	4.84	4.2592
		18.32	4.84	4.2592
		18.34	2.89	2.5432
		18.36	2.89	2.5432
		18.38	4.84	4.2592
		18.4	5.76	5.0688
		18.42	2.89	2.5432
		18.44	10.24	9.0112
		18.46	10.24	9.0112
		18.48	4.84	4.2592
		18.5	9	7.92
		18.52	12.96	11.4048
		18.54	9	7.92
		18.56	4	3.52
		18.58	5.76	5.0688
		18.6	2.89	2.5432
		18.62	7.84	6.8992
		18.64	4	3.52
		18.66	5.76	5.0688
		18.68	4	3.52
		18.7	4	3.52
		18.72	5.76	5.0688
		18.74	2.89	2.5432
		18.76	5.76	5.0688
		18.78	4.84	4.2592
		18.8	4.84	4.2592
		18.82	1.96	1.7248
		18.84	9	7.92
		18.86	2.89	2.5432
		18.88	7.84	6.8992
		18.9	1	0.88
		18.92	1.96	1.7248
		18.94	2.89	2.5432
		18.96	2.89	2.5432
		18.98	5.76	5.0688
		19	1	0.88
		19.02	2.89	2.5432
		19.04	4.84	4.2592
		19.06	2.89	2.5432
		19.08	1.96	1.7248
		19.1	1.96	1.7248
		19.12	4	3.52
		19.14	4	3.52
		19.16	2.89	2.5432
		19.18	9	7.92
		19.2	4	3.52
		19.22	1	0.88
		19.24	5.76	5.0688
		19.26	4	3.52
		19.28	1.96	1.7248
		19.3	1.96	1.7248
		19.32	2.89	2.5432
		19.34	1.96	1.7248
		19.36	4.84	4.2592
		19.38	1	0.88
		19.4	6.76	5.9488
		19.42	2.89	2.5432
		19.44	4.84	4.2592
		19.46	5.76	5.0688
		19.48	2.89	2.5432
		19.5	1.96	1.7248
		19.52	4	3.52
		19.54	4.84	4.2592
		19.56	4.84	4.2592
		19.58	2.89	2.5432
		19.6	4	3.52
		19.62	4	3.52
		19.64	4.84	4.2592
		19.66	2.89	2.5432
		19.68	1	0.88
		19.7	4	3.52
		19.72	6.76	5.9488
		19.74	1	0.88
		19.76	1	0.88
		19.78	2.89	2.5432
		19.8	1.96	1.7248
		19.82	6.76	5.9488
		19.84	4.84	4.2592
		19.86	2.89	2.5432
		19.88	1	0.88
		19.9	4	3.52
		19.92	1.96	1.7248
		19.94	5.76	5.0688
		19.96	2.89	2.5432
		19.98	7.84	6.8992
		20	5.76	5.0688
		20.02	9	7.92
		20.04	4	3.52
		20.06	4.84	4.2592
		20.08	2.89	2.5432
		20.1	2.89	2.5432
		20.12	1	0.88
		20.14	1	0.88
		20.16	1	0.88
		20.18	1.96	1.7248
		20.2	1.96	1.7248
		20.22	5.76	5.0688
		20.24	4	3.52
		20.26	4	3.52
		20.28	1.96	1.7248
		20.3	1	0.88
		20.32	1.96	1.7248
		20.34	5.76	5.0688
		20.36	1	0.88
		20.38	2.89	2.5432
		20.4	4	3.52
		20.42	4	3.52
		20.44	6.76	5.9488
		20.46	5.76	5.0688
		20.48	1	0.88
		20.5	6.76	5.9488
		20.52	4.84	4.2592
		20.54	2.89	2.5432
		20.56	1.96	1.7248
		20.58	4	3.52
		20.6	9	7.92
		20.62	5.76	5.0688
		20.64	1	0.88
		20.66	4	3.52
		20.68	2.89	2.5432
		20.7	5.76	5.0688
		20.72	4	3.52
		20.74	4	3.52
		20.76	5.76	5.0688
		20.78	1.96	1.7248
		20.8	6.76	5.9488
		20.82	4.84	4.2592
		20.84	1.96	1.7248
		20.86	1	0.88
		20.88	4.84	4.2592
		20.9	4	3.52
		20.92	2.89	2.5432
		20.94	5.76	5.0688
		20.96	4.84	4.2592
		20.98	6.76	5.9488
		21	4.84	4.2592
		21.02	1	0.88
		21.04	5.76	5.0688
		21.06	1	0.88
		21.08	4.84	4.2592
		21.1	1	0.88
		21.12	4.84	4.2592
		21.14	6.76	5.9488
		21.16	1.96	1.7248
		21.18	4.84	4.2592
		21.2	2.89	2.5432
		21.22	5.76	5.0688
		21.24	4.84	4.2592
		21.26	5.76	5.0688
		21.28	4	3.52
		21.3	4.84	4.2592
		21.32	1.96	1.7248
		21.34	5.76	5.0688
		21.36	4.84	4.2592
		21.38	2.89	2.5432
		21.4	0	0
		21.42	2.89	2.5432
		21.44	4.84	4.2592
		21.46	2.89	2.5432
		21.48	2.89	2.5432
		21.5	1.96	1.7248
		21.52	4.84	4.2592
		21.54	1.96	1.7248
		21.56	7.84	6.8992
		21.58	1.96	1.7248
		21.6	6.76	5.9488
		21.62	5.76	5.0688
		21.64	1.96	1.7248
		21.66	1.96	1.7248
		21.68	6.76	5.9488
		21.7	1.96	1.7248
		21.72	6.76	5.9488
		21.74	6.76	5.9488
		21.76	1.96	1.7248
		21.78	1.96	1.7248
		21.8	2.89	2.5432
		21.82	2.89	2.5432
		21.84	6.76	5.9488
		21.86	10.89	9.5832
		21.88	4	3.52
		21.9	5.76	5.0688
		21.92	4.84	4.2592
		21.94	6.76	5.9488
		21.96	2.89	2.5432
		21.98	2.89	2.5432
		22	5.76	5.0688
		22.02	6.76	5.9488
		22.04	2.89	2.5432
		22.06	2.89	2.5432
		22.08	4	3.52
		22.1	4	3.52
		22.12	4	3.52
		22.14	1.96	1.7248
		22.16	1	0.88
		22.18	4	3.52
		22.2	1.96	1.7248
		22.22	4.84	4.2592
		22.24	1	0.88
		22.26	1	0.88
		22.28	1.96	1.7248
		22.3	1	0.88
		22.32	5.76	5.0688
		22.34	9	7.92
		22.36	1.96	1.7248
		22.38	1.96	1.7248
		22.4	2.89	2.5432
		22.42	4	3.52
		22.44	1.96	1.7248
		22.46	4.84	4.2592
		22.48	4.84	4.2592
		22.5	5.76	5.0688
		22.52	6.76	5.9488
		22.54	2.89	2.5432
		22.56	1	0.88
		22.58	4	3.52
		22.6	1	0.88
		22.62	2.89	2.5432
		22.64	1.96	1.7248
		22.66	2.89	2.5432
		22.68	1.96	1.7248
		22.7	2.89	2.5432
		22.72	7.84	6.8992
		22.74	2.89	2.5432
		22.76	1.96	1.7248
		22.78	4	3.52
		22.8	4	3.52
		22.82	4.84	4.2592
		22.84	4.84	4.2592
		22.86	1.96	1.7248
		22.88	4	3.52
		22.9	4.84	4.2592
		22.92	4	3.52
		22.94	1	0.88
		22.96	6.76	5.9488
		22.98	4.84	4.2592
		23	4.84	4.2592
		23.02	5.76	5.0688
		23.04	5.76	5.0688
		23.06	4.84	4.2592
		23.08	6.76	5.9488
		23.1	4.84	4.2592
		23.12	4	3.52
		23.14	4.84	4.2592
		23.16	4.84	4.2592
		23.18	2.89	2.5432
		23.2	4.84	4.2592
		23.22	1.96	1.7248
		23.24	2.89	2.5432
		23.26	4.84	4.2592
		23.28	1.96	1.7248
		23.3	4.84	4.2592
		23.32	4.84	4.2592
		23.34	5.76	5.0688
		23.36	9	7.92
		23.38	1	0.88
		23.4	6.76	5.9488
		23.42	5.76	5.0688
		23.44	4	3.52
		23.46	4.84	4.2592
		23.48	4.84	4.2592
		23.5	4.84	4.2592
		23.52	2.89	2.5432
		23.54	6.76	5.9488
		23.56	2.89	2.5432
		23.58	4	3.52
		23.6	4	3.52
		23.62	5.76	5.0688
		23.64	6.76	5.9488
		23.66	1.96	1.7248
		23.68	4	3.52
		23.7	4.84	4.2592
		23.72	2.89	2.5432
		23.74	2.89	2.5432
		23.76	4	3.52
		23.78	4	3.52
		23.8	5.76	5.0688
		23.82	5.76	5.0688
		23.84	5.76	5.0688
		23.86	6.76	5.9488
		23.88	4	3.52
		23.9	5.76	5.0688
		23.92	7.84	6.8992
		23.94	4.84	4.2592
		23.96	5.76	5.0688
		23.98	2.89	2.5432
		24	1.96	1.7248
		24.02	4	3.52
		24.04	4.84	4.2592
		24.06	6.76	5.9488
		24.08	4	3.52
		24.1	4	3.52
		24.12	4.84	4.2592
		24.14	2.89	2.5432
		24.16	9	7.92
		24.18	4	3.52
		24.2	4.84	4.2592
		24.22	4	3.52
		24.24	5.76	5.0688
		24.26	1	0.88
		24.28	7.84	6.8992
		24.3	4.84	4.2592
		24.32	5.76	5.0688
		24.34	2.89	2.5432
		24.36	7.84	6.8992
		24.38	1.96	1.7248
		24.4	5.76	5.0688
		24.42	1.96	1.7248
		24.44	6.76	5.9488
		24.46	2.89	2.5432
		24.48	2.89	2.5432
		24.5	4.84	4.2592
		24.52	2.89	2.5432
		24.54	4	3.52
		24.56	4	3.52
		24.58	4	3.52
		24.6	5.76	5.0688
		24.62	1.96	1.7248
		24.64	4	3.52
		24.66	7.84	6.8992
		24.68	1	0.88
		24.7	2.89	2.5432
		24.72	1.96	1.7248
		24.74	6.76	5.9488
		24.76	2.89	2.5432
		24.78	4.84	4.2592
		24.8	9	7.92
		24.82	4	3.52
		24.84	6.76	5.9488
		24.86	4.84	4.2592
		24.88	1.96	1.7248
		24.9	4.84	4.2592
		24.92	4.84	4.2592
		24.94	4.84	4.2592
		24.96	4.84	4.2592
		24.98	2.89	2.5432
		25	4.84	4.2592
		25.02	4	3.52
		25.04	2.89	2.5432
		25.06	5.76	5.0688
		25.08	4	3.52
		25.1	7.84	6.8992
		25.12	1	0.88
		25.14	5.76	5.0688
		25.16	1.96	1.7248
		25.18	2.89	2.5432
		25.2	1.96	1.7248
		25.22	2.89	2.5432
		25.24	4.84	4.2592
		25.26	4	3.52
		25.28	4.84	4.2592
		25.3	2.89	2.5432
		25.32	2.89	2.5432
		25.34	2.89	2.5432
		25.36	1.96	1.7248
		25.38	4.84	4.2592
		25.4	4	3.52
		25.42	1.96	1.7248
		25.44	1.96	1.7248
		25.46	5.76	5.0688
		25.48	1	0.88
		25.5	4	3.52
		25.52	7.84	6.8992
		25.54	4	3.52
		25.56	2.89	2.5432
		25.58	10.24	9.0112
		25.6	4.84	4.2592
		25.62	5.76	5.0688
		25.64	2.89	2.5432
		25.66	2.89	2.5432
		25.68	5.76	5.0688
		25.7	4	3.52
		25.72	2.89	2.5432
		25.74	6.76	5.9488
		25.76	9	7.92
		25.78	4.84	4.2592
		25.8	6.76	5.9488
		25.82	2.89	2.5432
		25.84	9	7.92
		25.86	4.84	4.2592
		25.88	2.89	2.5432
		25.9	5.76	5.0688
		25.92	5.76	5.0688
		25.94	2.89	2.5432
		25.96	5.76	5.0688
		25.98	4	3.52
		26	4	3.52
		26.02	4	3.52
		26.04	6.76	5.9488
		26.06	2.89	2.5432
		26.08	4	3.52
		26.1	4.84	4.2592
		26.12	5.76	5.0688
		26.14	7.84	6.8992
		26.16	6.76	5.9488
		26.18	4.84	4.2592
		26.2	2.89	2.5432
		26.22	2.89	2.5432
		26.24	1	0.88
		26.26	4	3.52
		26.28	4	3.52
		26.3	1	0.88
		26.32	5.76	5.0688
		26.34	1.96	1.7248
		26.36	4.84	4.2592
		26.38	6.76	5.9488
		26.4	4.84	4.2592
		26.42	4	3.52
		26.44	4	3.52
		26.46	9	7.92
		26.48	2.89	2.5432
		26.5	5.76	5.0688
		26.52	1.96	1.7248
		26.54	1.96	1.7248
		26.56	4.84	4.2592
		26.58	5.76	5.0688
		26.6	4.84	4.2592
		26.62	9	7.92
		26.64	7.84	6.8992
		26.66	4.84	4.2592
		26.68	1.96	1.7248
		26.7	5.76	5.0688
		26.72	4	3.52
		26.74	4.84	4.2592
		26.76	2.89	2.5432
		26.78	7.84	6.8992
		26.8	1.96	1.7248
		26.82	10.24	9.0112
		26.84	5.76	5.0688
		26.86	4.84	4.2592
		26.88	4.84	4.2592
		26.9	2.89	2.5432
		26.92	4.84	4.2592
		26.94	4.84	4.2592
		26.96	6.76	5.9488
		26.98	4	3.52
		27	10.24	9.0112
		27.02	5.76	5.0688
		27.04	4	3.52
		27.06	5.76	5.0688
		27.08	4.84	4.2592
		27.1	2.89	2.5432
		27.12	2.89	2.5432
		27.14	5.76	5.0688
		27.16	6.76	5.9488
		27.18	2.89	2.5432
		27.2	2.89	2.5432
		27.22	1	0.88
		27.24	5.76	5.0688
		27.26	2.89	2.5432
		27.28	4	3.52
		27.3	9	7.92
		27.32	2.89	2.5432
		27.34	4	3.52
		27.36	1.96	1.7248
		27.38	5.76	5.0688
		27.4	6.76	5.9488
		27.42	5.76	5.0688
		27.44	4.84	4.2592
		27.46	4.84	4.2592
		27.48	6.76	5.9488
		27.5	1.96	1.7248
		27.52	4	3.52
		27.54	1	0.88
		27.56	4	3.52
		27.58	5.76	5.0688
		27.6	4	3.52
		27.62	4	3.52
		27.64	4	3.52
		27.66	5.76	5.0688
		27.68	4.84	4.2592
		27.7	9	7.92
		27.72	4	3.52
		27.74	9	7.92
		27.76	4	3.52
		27.78	4	3.52
		27.8	6.76	5.9488
		27.82	10.24	9.0112
		27.84	5.76	5.0688
		27.86	4.84	4.2592
		27.88	4.84	4.2592
		27.9	1.96	1.7248
		27.92	9	7.92
		27.94	5.76	5.0688
		27.96	2.89	2.5432
		27.98	2.89	2.5432
		28	6.76	5.9488
		28.02	4	3.52
		28.04	4	3.52
		28.06	2.89	2.5432
		28.08	4	3.52
		28.1	2.89	2.5432
		28.12	4	3.52
		28.14	6.76	5.9488
		28.16	1.96	1.7248
		28.18	5.76	5.0688
		28.2	6.76	5.9488
		28.22	10.89	9.5832
		28.24	2.89	2.5432
		28.26	4	3.52
		28.28	4.84	4.2592
		28.3	4	3.52
		28.32	2.89	2.5432
		28.34	2.89	2.5432
		28.36	4	3.52
		28.38	4	3.52
		28.4	1.96	1.7248
		28.42	5.76	5.0688
		28.44	4	3.52
		28.46	1.96	1.7248
		28.48	7.84	6.8992
		28.5	1	0.88
		28.52	4	3.52
		28.54	4.84	4.2592
		28.56	9	7.92
		28.58	4	3.52
		28.6	4.84	4.2592
		28.62	5.76	5.0688
		28.64	6.76	5.9488
		28.66	7.84	6.8992
		28.68	5.76	5.0688
		28.7	0	0
		28.72	6.76	5.9488
		28.74	1.96	1.7248
		28.76	5.76	5.0688
		28.78	6.76	5.9488
		28.8	6.76	5.9488
		28.82	9	7.92
		28.84	2.89	2.5432
		28.86	7.84	6.8992
		28.88	5.76	5.0688
		28.9	7.84	6.8992
		28.92	4	3.52
		28.94	10.89	9.5832
		28.96	4	3.52
		28.98	9	7.92
		29	2.89	2.5432
		29.02	5.76	5.0688
		29.04	9	7.92
		29.06	5.76	5.0688
		29.08	6.76	5.9488
		29.1	4	3.52
		29.12	4.84	4.2592
		29.14	9	7.92
		29.16	6.76	5.9488
		29.18	4.84	4.2592
		29.2	4	3.52
		29.22	4.84	4.2592
		29.24	6.76	5.9488
		29.26	6.76	5.9488
		29.28	7.84	6.8992
		29.3	12.96	11.4048
		29.32	4.84	4.2592
		29.34	4.84	4.2592
		29.36	2.89	2.5432
		29.38	2.89	2.5432
		29.4	2.89	2.5432
		29.42	2.89	2.5432
		29.44	5.76	5.0688
		29.46	10.89	9.5832
		29.48	2.89	2.5432
		29.5	12.25	10.78
		29.52	9	7.92
		29.54	16.81	14.7928
		29.56	9	7.92
		29.58	6.76	5.9488
		29.6	10.24	9.0112
		29.62	15.21	13.3848
		29.64	6.76	5.9488
		29.66	9	7.92
		29.68	10.89	9.5832
		29.7	10.89	9.5832
		29.72	4	3.52
		29.74	13.69	12.0472
		29.76	10.24	9.0112
		29.78	12.96	11.4048
		29.8	15.21	13.3848
		29.82	13.69	12.0472
		29.84	9	7.92
		29.86	13.69	12.0472
		29.88	13.69	12.0472
		29.9	13.69	12.0472
		29.92	13.69	12.0472
		29.94	16.81	14.7928
		29.96	16	14.08
		29.98	16.81	14.7928
		30	24.01	21.1288
		30.02	23.04	20.2752
		30.04	16	14.08
		30.06	19.36	17.0368
		30.08	25	22
		30.1	28.09	24.7192
		30.12	36	31.68
		30.14	37.21	32.7448
		30.16	33.64	29.6032
		30.18	34.81	30.6328
		30.2	34.81	30.6328
		30.22	39.69	34.9272
		30.24	33.64	29.6032
		30.26	38.44	33.8272
		30.28	40.96	36.0448
		30.3	38.44	33.8272
		30.32	37.21	32.7448
		30.34	37.21	32.7448
		30.36	30.25	26.62
		30.38	20.25	17.82
		30.4	32.49	28.5912
		30.42	32.49	28.5912
		30.44	21.16	18.6208
		30.46	22.09	19.4392
		30.48	28.09	24.7192
		30.5	22.09	19.4392
		30.52	22.09	19.4392
		30.54	16	14.08
		30.56	23.04	20.2752
		30.58	25	22
		30.6	24.01	21.1288
		30.62	13.69	12.0472
		30.64	15.21	13.3848
		30.66	13.69	12.0472
		30.68	16	14.08
		30.7	19.36	17.0368
		30.72	10.89	9.5832
		30.74	12.25	10.78
		30.76	10.89	9.5832
		30.78	9	7.92
		30.8	6.76	5.9488
		30.82	7.84	6.8992
		30.84	13.69	12.0472
		30.86	13.69	12.0472
		30.88	7.84	6.8992
		30.9	7.84	6.8992
		30.92	10.89	9.5832
		30.94	9	7.92
		30.96	13.69	12.0472
		30.98	10.89	9.5832
		31	12.96	11.4048
		31.02	6.76	5.9488
		31.04	13.69	12.0472
		31.06	6.76	5.9488
		31.08	6.76	5.9488
		31.1	5.76	5.0688
		31.12	4	3.52
		31.14	6.76	5.9488
		31.16	5.76	5.0688
		31.18	7.84	6.8992
		31.2	4	3.52
		31.22	4.84	4.2592
		31.24	5.76	5.0688
		31.26	6.76	5.9488
		31.28	5.76	5.0688
		31.3	2.89	2.5432
		31.32	10.24	9.0112
		31.34	9	7.92
		31.36	10.89	9.5832
		31.38	4.84	4.2592
		31.4	4.84	4.2592
		31.42	1.96	1.7248
		31.44	6.76	5.9488
		31.46	7.84	6.8992
		31.48	12.96	11.4048
		31.5	6.76	5.9488
		31.52	4.84	4.2592
		31.54	4	3.52
		31.56	9	7.92
		31.58	9	7.92
		31.6	1.96	1.7248
		31.62	15.21	13.3848
		31.64	6.76	5.9488
		31.66	4.84	4.2592
		31.68	6.76	5.9488
		31.7	4	3.52
		31.72	4.84	4.2592
		31.74	6.76	5.9488
		31.76	9	7.92
		31.78	2.89	2.5432
		31.8	9	7.92
		31.82	2.89	2.5432
		31.84	9	7.92
		31.86	4.84	4.2592
		31.88	7.84	6.8992
		31.9	12.25	10.78
		31.92	2.89	2.5432
		31.94	9	7.92
		31.96	6.76	5.9488
		31.98	4.84	4.2592
		32	9	7.92
		32.02	6.76	5.9488
		32.04	5.76	5.0688
		32.06	1.96	1.7248
		32.08	4	3.52
		32.1	2.89	2.5432
		32.12	4	3.52
		32.14	1	0.88
		32.16	4.84	4.2592
		32.18	4.84	4.2592
		32.2	10.24	9.0112
		32.22	2.89	2.5432
		32.24	5.76	5.0688
		32.26	5.76	5.0688
		32.28	6.76	5.9488
		32.3	10.24	9.0112
		32.32	5.76	5.0688
		32.34	6.76	5.9488
		32.36	4	3.52
		32.38	4.84	4.2592
		32.4	1.96	1.7248
		32.42	7.84	6.8992
		32.44	5.76	5.0688
		32.46	6.76	5.9488
		32.48	6.76	5.9488
		32.5	1	0.88
		32.52	12.25	10.78
		32.54	6.76	5.9488
		32.56	9	7.92
		32.58	5.76	5.0688
		32.6	7.84	6.8992
		32.62	4.84	4.2592
		32.64	6.76	5.9488
		32.66	1.96	1.7248
		32.68	2.89	2.5432
		32.7	7.84	6.8992
		32.72	4.84	4.2592
		32.74	1.96	1.7248
		32.76	1	0.88
		32.78	7.84	6.8992
		32.8	5.76	5.0688
		32.82	5.76	5.0688
		32.84	6.76	5.9488
		32.86	6.76	5.9488
		32.88	7.84	6.8992
		32.9	4.84	4.2592
		32.92	2.89	2.5432
		32.94	6.76	5.9488
		32.96	5.76	5.0688
		32.98	12.25	10.78
		33	7.84	6.8992
		33.02	7.84	6.8992
		33.04	2.89	2.5432
		33.06	7.84	6.8992
		33.08	5.76	5.0688
		33.1	9	7.92
		33.12	10.24	9.0112
		33.14	4	3.52
		33.16	6.76	5.9488
		33.18	5.76	5.0688
		33.2	4.84	4.2592
		33.22	6.76	5.9488
		33.24	7.84	6.8992
		33.26	10.89	9.5832
		33.28	4	3.52
		33.3	4	3.52
		33.32	4	3.52
		33.34	10.24	9.0112
		33.36	9	7.92
		33.38	4	3.52
		33.4	10.24	9.0112
		33.42	6.76	5.9488
		33.44	9	7.92
		33.46	7.84	6.8992
		33.48	1.96	1.7248
		33.5	4.84	4.2592
		33.52	4.84	4.2592
		33.54	4.84	4.2592
		33.56	2.89	2.5432
		33.58	6.76	5.9488
		33.6	4.84	4.2592
		33.62	5.76	5.0688
		33.64	12.25	10.78
		33.66	6.76	5.9488
		33.68	12.96	11.4048
		33.7	2.89	2.5432
		33.72	10.24	9.0112
		33.74	10.89	9.5832
		33.76	6.76	5.9488
		33.78	5.76	5.0688
		33.8	7.84	6.8992
		33.82	4.84	4.2592
		33.84	10.24	9.0112
		33.86	5.76	5.0688
		33.88	7.84	6.8992
		33.9	4	3.52
		33.92	10.89	9.5832
		33.94	10.89	9.5832
		33.96	6.76	5.9488
		33.98	7.84	6.8992
		34	9	7.92
		34.02	1	0.88
		34.04	6.76	5.9488
		34.06	10.24	9.0112
		34.08	7.84	6.8992
		34.1	4.84	4.2592
		34.12	4.84	4.2592
		34.14	6.76	5.9488
		34.16	10.24	9.0112
		34.18	15.21	13.3848
		34.2	5.76	5.0688
		34.22	10.89	9.5832
		34.24	12.96	11.4048
		34.26	7.84	6.8992
		34.28	6.76	5.9488
		34.3	5.76	5.0688
		34.32	12.96	11.4048
		34.34	7.84	6.8992
		34.36	6.76	5.9488
		34.38	10.89	9.5832
		34.4	7.84	6.8992
		34.42	12.25	10.78
		34.44	9	7.92
		34.46	10.24	9.0112
		34.48	7.84	6.8992
		34.5	4	3.52
		34.52	13.69	12.0472
		34.54	10.24	9.0112
		34.56	9	7.92
		34.58	4.84	4.2592
		34.6	9	7.92
		34.62	12.25	10.78
		34.64	13.69	12.0472
		34.66	10.89	9.5832
		34.68	10.24	9.0112
		34.7	15.21	13.3848
		34.72	10.89	9.5832
		34.74	16	14.08
		34.76	19.36	17.0368
		34.78	19.36	17.0368
		34.8	15.21	13.3848
		34.82	16	14.08
		34.84	22.09	19.4392
		34.86	17.64	15.5232
		34.88	12.25	10.78
		34.9	27.04	23.7952
		34.92	12.25	10.78
		34.94	22.09	19.4392
		34.96	16	14.08
		34.98	25	22
		35	17.64	15.5232
		35.02	24.01	21.1288
		35.04	31.36	27.5968
		35.06	31.36	27.5968
		35.08	25	22
		35.1	23.04	20.2752
		35.12	33.64	29.6032
		35.14	26.01	22.8888
		35.16	31.36	27.5968
		35.18	40.96	36.0448
		35.2	36	31.68
		35.22	28.09	24.7192
		35.24	43.56	38.3328
		35.26	33.64	29.6032
		35.28	50.41	44.3608
		35.3	39.69	34.9272
		35.32	67.24	59.1712
		35.34	70.56	62.0928
		35.36	50.41	44.3608
		35.38	68.89	60.6232
		35.4	88.36	77.7568
		35.42	86.49	76.1112
		35.44	77.44	68.1472
		35.46	98.01	86.2488
		35.48	110.25	97.02
		35.5	108.16	95.1808
		35.52	121	106.48
		35.54	127.69	112.367
		35.56	129.96	114.365
		35.58	148.84	130.979
		35.6	121	106.48
		35.62	146.41	128.841
		35.64	144	126.72
		35.66	141.61	124.617
		35.68	114.49	100.751
		35.7	129.96	114.365
		35.72	100	88
		35.74	134.56	118.413
		35.76	116.64	102.643
		35.78	98.01	86.2488
		35.8	94.09	82.7992
		35.82	96.04	84.5152
		35.84	75.69	66.6072
		35.86	75.69	66.6072
		35.88	73.96	65.0848
		35.9	73.96	65.0848
		35.92	81	71.28
		35.94	47.61	41.8968
		35.96	47.61	41.8968
		35.98	50.41	44.3608
		36	56.25	49.5
		36.02	46.24	40.6912
		36.04	36	31.68
		36.06	56.25	49.5
		36.08	36	31.68
		36.1	38.44	33.8272
		36.12	36	31.68
		36.14	38.44	33.8272
		36.16	16.81	14.7928
		36.18	27.04	23.7952
		36.2	22.09	19.4392
		36.22	32.49	28.5912
		36.24	25	22
		36.26	30.25	26.62
		36.28	13.69	12.0472
		36.3	19.36	17.0368
		36.32	26.01	22.8888
		36.34	31.36	27.5968
		36.36	23.04	20.2752
		36.38	13.69	12.0472
		36.4	19.36	17.0368
		36.42	21.16	18.6208
		36.44	21.16	18.6208
		36.46	15.21	13.3848
		36.48	13.69	12.0472
		36.5	10.24	9.0112
		36.52	7.84	6.8992
		36.54	7.84	6.8992
		36.56	12.25	10.78
		36.58	7.84	6.8992
		36.6	16	14.08
		36.62	6.76	5.9488
		36.64	12.96	11.4048
		36.66	7.84	6.8992
		36.68	10.89	9.5832
		36.7	12.25	10.78
		36.72	9	7.92
		36.74	7.84	6.8992
		36.76	6.76	5.9488
		36.78	15.21	13.3848
		36.8	13.69	12.0472
		36.82	5.76	5.0688
		36.84	10.24	9.0112
		36.86	12.25	10.78
		36.88	12.25	10.78
		36.9	4.84	4.2592
		36.92	6.76	5.9488
		36.94	7.84	6.8992
		36.96	9	7.92
		36.98	6.76	5.9488
		37	4	3.52
		37.02	9	7.92
		37.04	10.89	9.5832
		37.06	12.96	11.4048
		37.08	12.96	11.4048
		37.1	7.84	6.8992
		37.12	10.24	9.0112
		37.14	17.64	15.5232
		37.16	12.96	11.4048
		37.18	13.69	12.0472
		37.2	10.89	9.5832
		37.22	12.25	10.78
		37.24	12.25	10.78
		37.26	16.81	14.7928
		37.28	9	7.92
		37.3	10.24	9.0112
		37.32	12.96	11.4048
		37.34	9	7.92
		37.36	17.64	15.5232
		37.38	6.76	5.9488
		37.4	12.25	10.78
		37.42	10.24	9.0112
		37.44	15.21	13.3848
		37.46	6.76	5.9488
		37.48	5.76	5.0688
		37.5	10.24	9.0112
		37.52	7.84	6.8992
		37.54	4	3.52
		37.56	10.24	9.0112
		37.58	6.76	5.9488
		37.6	10.89	9.5832
		37.62	4.84	4.2592
		37.64	4	3.52
		37.66	2.89	2.5432
		37.68	5.76	5.0688
		37.7	6.76	5.9488
		37.72	9	7.92
		37.74	4	3.52
		37.76	5.76	5.0688
		37.78	4	3.52
		37.8	7.84	6.8992
		37.82	7.84	6.8992
		37.84	2.89	2.5432
		37.86	4.84	4.2592
		37.88	4.84	4.2592
		37.9	6.76	5.9488
		37.92	1	0.88
		37.94	4	3.52
		37.96	4.84	4.2592
		37.98	4	3.52
		38	2.89	2.5432
		38.02	7.84	6.8992
		38.04	2.89	2.5432
		38.06	1.96	1.7248
		38.08	4	3.52
		38.1	4	3.52
		38.12	2.89	2.5432
		38.14	7.84	6.8992
		38.16	2.89	2.5432
		38.18	7.84	6.8992
		38.2	4.84	4.2592
		38.22	4.84	4.2592
		38.24	2.89	2.5432
		38.26	4.84	4.2592
		38.28	4	3.52
		38.3	4.84	4.2592
		38.32	4	3.52
		38.34	1.96	1.7248
		38.36	4.84	4.2592
		38.38	1	0.88
		38.4	4.84	4.2592
		38.42	4	3.52
		38.44	2.89	2.5432
		38.46	4	3.52
		38.48	9	7.92
		38.5	5.76	5.0688
		38.52	7.84	6.8992
		38.54	4	3.52
		38.56	2.89	2.5432
		38.58	4.84	4.2592
		38.6	4	3.52
		38.62	2.89	2.5432
		38.64	2.89	2.5432
		38.66	4	3.52
		38.68	4.84	4.2592
		38.7	4.84	4.2592
		38.72	4.84	4.2592
		38.74	5.76	5.0688
		38.76	9	7.92
		38.78	1	0.88
		38.8	0	0
		38.82	2.89	2.5432
		38.84	6.76	5.9488
		38.86	1.96	1.7248
		38.88	4.84	4.2592
		38.9	1.96	1.7248
		38.92	2.89	2.5432
		38.94	6.76	5.9488
		38.96	6.76	5.9488
		38.98	1.96	1.7248
		39	4.84	4.2592
		39.02	0	0
		39.04	2.89	2.5432
		39.06	4	3.52
		39.08	4.84	4.2592
		39.1	4.84	4.2592
		39.12	1.96	1.7248
		39.14	4	3.52
		39.16	4	3.52
		39.18	2.89	2.5432
		39.2	4	3.52
		39.22	1	0.88
		39.24	2.89	2.5432
		39.26	4.84	4.2592
		39.28	4	3.52
		39.3	1	0.88
		39.32	2.89	2.5432
		39.34	4	3.52
		39.36	1.96	1.7248
		39.38	2.89	2.5432
		39.4	5.76	5.0688
		39.42	2.89	2.5432
		39.44	4.84	4.2592
		39.46	4	3.52
		39.48	1	0.88
		39.5	4	3.52
		39.52	4.84	4.2592
		39.54	4	3.52
		39.56	4	3.52
		39.58	5.76	5.0688
		39.6	1.96	1.7248
		39.62	4.84	4.2592
		39.64	7.84	6.8992
		39.66	4.84	4.2592
		39.68	1.96	1.7248
		39.7	5.76	5.0688
		39.72	2.89	2.5432
		39.74	1.96	1.7248
		39.76	2.89	2.5432
		39.78	6.76	5.9488
		39.8	1.96	1.7248
		39.82	1.96	1.7248
		39.84	4	3.52
		39.86	4.84	4.2592
		39.88	2.89	2.5432
		39.9	1.96	1.7248
		39.92	6.76	5.9488
		39.94	2.89	2.5432
		39.96	2.89	2.5432
		39.98	1	0.88
		40	1.96	1.7248
		40.02	1	0.88
		40.04	4	3.52
		40.06	4	3.52
		40.08	1.96	1.7248
		40.1	4	3.52
		40.12	10.24	9.0112
		40.14	4	3.52
		40.16	4	3.52
		40.18	1.96	1.7248
		40.2	4	3.52
		40.22	1.96	1.7248
		40.24	1	0.88
		40.26	2.89	2.5432
		40.28	1.96	1.7248
		40.3	4	3.52
		40.32	2.89	2.5432
		40.34	1.96	1.7248
		40.36	1.96	1.7248
		40.38	2.89	2.5432
		40.4	4	3.52
		40.42	6.76	5.9488
		40.44	4.84	4.2592
		40.46	6.76	5.9488
		40.48	1	0.88
		40.5	2.89	2.5432
		40.52	4.84	4.2592
		40.54	4	3.52
		40.56	1	0.88
		40.58	1.96	1.7248
		40.6	5.76	5.0688
		40.62	4.84	4.2592
		40.64	2.89	2.5432
		40.66	2.89	2.5432
		40.68	2.89	2.5432
		40.7	4	3.52
		40.72	5.76	5.0688
		40.74	2.89	2.5432
		40.76	4	3.52
		40.78	4	3.52
		40.8	2.89	2.5432
		40.82	2.89	2.5432
		40.84	5.76	5.0688
		40.86	4.84	4.2592
		40.88	6.76	5.9488
		40.9	1.96	1.7248
		40.92	1.96	1.7248
		40.94	4.84	4.2592
		40.96	4	3.52
		40.98	1.96	1.7248
		41	4.84	4.2592
		41.02	4.84	4.2592
		41.04	0	0
		41.06	4	3.52
		41.08	4.84	4.2592
		41.1	2.89	2.5432
		41.12	5.76	5.0688
		41.14	1	0.88
		41.16	1.96	1.7248
		41.18	1.96	1.7248
		41.2	5.76	5.0688
		41.22	4.84	4.2592
		41.24	1.96	1.7248
		41.26	4	3.52
		41.28	2.89	2.5432
		41.3	4.84	4.2592
		41.32	2.89	2.5432
		41.34	4	3.52
		41.36	1	0.88
		41.38	4.84	4.2592
		41.4	5.76	5.0688
		41.42	4	3.52
		41.44	1.96	1.7248
		41.46	4	3.52
		41.48	4.84	4.2592
		41.5	4.84	4.2592
		41.52	2.89	2.5432
		41.54	4.84	4.2592
		41.56	1	0.88
		41.58	7.84	6.8992
		41.6	2.89	2.5432
		41.62	4	3.52
		41.64	6.76	5.9488
		41.66	4	3.52
		41.68	4	3.52
		41.7	1.96	1.7248
		41.72	2.89	2.5432
		41.74	1.96	1.7248
		41.76	4.84	4.2592
		41.78	5.76	5.0688
		41.8	4	3.52
		41.82	4.84	4.2592
		41.84	4.84	4.2592
		41.86	2.89	2.5432
		41.88	1.96	1.7248
		41.9	4.84	4.2592
		41.92	2.89	2.5432
		41.94	4.84	4.2592
		41.96	4.84	4.2592
		41.98	1.96	1.7248
		42	4.84	4.2592
		42.02	2.89	2.5432
		42.04	2.89	2.5432
		42.06	5.76	5.0688
		42.08	4	3.52
		42.1	6.76	5.9488
		42.12	4	3.52
		42.14	5.76	5.0688
		42.16	4	3.52
		42.18	4	3.52
		42.2	4	3.52
		42.22	1.96	1.7248
		42.24	7.84	6.8992
		42.26	4	3.52
		42.28	5.76	5.0688
		42.3	6.76	5.9488
		42.32	6.76	5.9488
		42.34	7.84	6.8992
		42.36	9	7.92
		42.38	10.89	9.5832
		42.4	1	0.88
		42.42	4.84	4.2592
		42.44	1.96	1.7248
		42.46	10.24	9.0112
		42.48	5.76	5.0688
		42.5	2.89	2.5432
		42.52	12.96	11.4048
		42.54	4.84	4.2592
		42.56	4.84	4.2592
		42.58	10.24	9.0112
		42.6	4.84	4.2592
		42.62	12.96	11.4048
		42.64	4.84	4.2592
		42.66	7.84	6.8992
		42.68	6.76	5.9488
		42.7	6.76	5.9488
		42.72	2.89	2.5432
		42.74	10.24	9.0112
		42.76	6.76	5.9488
		42.78	5.76	5.0688
		42.8	12.96	11.4048
		42.82	7.84	6.8992
		42.84	5.76	5.0688
		42.86	9	7.92
		42.88	12.96	11.4048
		42.9	16.81	14.7928
		42.92	7.84	6.8992
		42.94	15.21	13.3848
		42.96	19.36	17.0368
		42.98	12.25	10.78
		43	22.09	19.4392
		43.02	26.01	22.8888
		43.04	21.16	18.6208
		43.06	21.16	18.6208
		43.08	30.25	26.62
		43.1	19.36	17.0368
		43.12	29.16	25.6608
		43.14	36	31.68
		43.16	36	31.68
		43.18	31.36	27.5968
		43.2	36	31.68
		43.22	27.04	23.7952
		43.24	26.01	22.8888
		43.26	44.89	39.5032
		43.28	36	31.68
		43.3	34.81	30.6328
		43.32	31.36	27.5968
		43.34	39.69	34.9272
		43.36	32.49	28.5912
		43.38	36	31.68
		43.4	25	22
		43.42	24.01	21.1288
		43.44	29.16	25.6608
		43.46	33.64	29.6032
		43.48	23.04	20.2752
		43.5	28.09	24.7192
		43.52	24.01	21.1288
		43.54	25	22
		43.56	28.09	24.7192
		43.58	6.76	5.9488
		43.6	32.49	28.5912
		43.62	16.81	14.7928
		43.64	16	14.08
		43.66	15.21	13.3848
		43.68	19.36	17.0368
		43.7	12.96	11.4048
		43.72	5.76	5.0688
		43.74	12.25	10.78
		43.76	12.25	10.78
		43.78	16	14.08
		43.8	12.25	10.78
		43.82	7.84	6.8992
		43.84	12.25	10.78
		43.86	10.89	9.5832
		43.88	7.84	6.8992
		43.9	12.25	10.78
		43.92	10.89	9.5832
		43.94	6.76	5.9488
		43.96	4.84	4.2592
		43.98	10.89	9.5832
		44	9	7.92
		44.02	7.84	6.8992
		44.04	12.96	11.4048
		44.06	7.84	6.8992
		44.08	1	0.88
		44.1	5.76	5.0688
		44.12	7.84	6.8992
		44.14	6.76	5.9488
		44.16	6.76	5.9488
		44.18	2.89	2.5432
		44.2	12.25	10.78
		44.22	2.89	2.5432
		44.24	4.84	4.2592
		44.26	4.84	4.2592
		44.28	4.84	4.2592
		44.3	5.76	5.0688
		44.32	7.84	6.8992
		44.34	7.84	6.8992
		44.36	1	0.88
		44.38	5.76	5.0688
		44.4	2.89	2.5432
		44.42	4.84	4.2592
		44.44	4.84	4.2592
		44.46	4.84	4.2592
		44.48	4	3.52
		44.5	4.84	4.2592
		44.52	2.89	2.5432
		44.54	1.96	1.7248
		44.56	4.84	4.2592
		44.58	2.89	2.5432
		44.6	2.89	2.5432
		44.62	4	3.52
		44.64	5.76	5.0688
		44.66	0	0
		44.68	4	3.52
		44.7	2.89	2.5432
		44.72	4.84	4.2592
		44.74	1.96	1.7248
		44.76	4	3.52
		44.78	1	0.88
		44.8	4	3.52
		44.82	2.89	2.5432
		44.84	4	3.52
		44.86	4	3.52
		44.88	4	3.52
		44.9	4	3.52
		44.92	4	3.52
		44.94	4	3.52
		44.96	2.89	2.5432
		44.98	1.96	1.7248
[truncated: 2,751 more rows]

## Sheet: ContactAngle membrane
	TFC	67.54
	TFN-0.05	61.39
	TFN-0.1	56.39
	TFN-0.3	51.78

## Sheet: Flux
Flux
	60	58.36	52.36	50.17	47.96
	120	59.23	52.25	50.75	48.03
	180	58.12	51.88	50.45	48.12
	240	57.62	51.03	50.12	48.01
	300	56.44	50.42	49.25	47.65
	360	56.01	50.33	48.77	47.44
	420	55.88	50.26	48.45	47.12
	480	55.45	50.01	48.12	47.01
	540	55.24	49.75	48.02	46.79
	600	55.03	49.5	48.08	46.8
	660	55.04	49.55	48.1	46.74
	720	55.11	49.46	48.05	46.8

## Sheet: COD
	0	1645	1645	1645	1645
	1	1235	1103	1078	1100
	2	1097	1000	972	995
	3	1104	1021	985	990
	4	1058	1011	990	996
	5	1016	995	965	979
	6	1023	990	912	950
	7	956	912	825	932
	8	866	860	832	852
	9	836	802	770	836
	10	804	779	725	769
	11	812	780	669	753
	12	759	725	604	720
	13	656	601	510	589
	14	574	489	389	506
	15	582	445	264	432
	16	569	436	212	412
	17	494	437	194	409
	18	492	420	190	403
	19	493	421	189	404
	20	491	423	189	402

## Sheet: TSS
	0	265	265	265	265
	1	260	258	248	252
	2	256	252	249	251
	3	257	251	240	249
	4	250	246	241	245
	5	246	243	236	239
	6	231	227	229	227
	7	224	221	201	214
	8	221	217	189	210
	9	217	211	181	195
	10	215	205	173	187
	11	211	197	164	179
	12	204	186	157	178
	13	205	182	146	170
	14	206	172	134	162
	15	201	171	135	163
	16	198	173	132	164
	17	200	170	132	162
	18	201	169	131	163
	19	199	169	131	164
	20	200	170	132	162

[truncated: 6 more sheets: DO, NTU, OilWater, MLSS, Removal, Fouling]
